# Supplementary material for: Stable Associations Masked by Temporal Variability in the Marine Copepod Microbiome
Source: PubMed Central journal article supplement (PMC4579122; doi:10.1371/journal.pone.0138967), 2015-09-22
Supplement: pone.0138967.s004.pdf [file pone.0138967.s004.pdf]

| Taxon                                                                                                                   | 1180          | 1182       | 1183       | 1203       | 1211       | 1242       | 6475       | 6476       | 6477       | 1220       | 1221       | 1248       | 2032       | 2033       | 2034       |
|-------------------------------------------------------------------------------------------------------------------------|---------------|------------|------------|------------|------------|------------|------------|------------|------------|------------|------------|------------|------------|------------|------------|
|                                                                                                                         | Copepod genus | Acartia    | Acartia    | Acartia    | Acartia    | Acartia    | Acartia    | Acartia    | Acartia    | Acartia    | Acartia    | Acartia    | Acartia    | Acartia    | Acartia    |
| Type of sample                                                                                                          | FullGut       | FullGut    | FullGut    | FullGut    | FullGut    | FullGut    | FullGut    | FullGut    | FullGut    | Starved    | Starved    | Starved    | Starved    | Starved    | Starved    |
| k_Bacteria;p__Actinobacteria;c__Actinobacteria;o__Actinomycetales;f__Mycobacteriaceae;g__Mycobacterium                  | 0             | 0          | 0          | 0          | 0          | 0.00037814 | 0          | 0          | 0          | 0.00018601 | 0.0016835  | 0          | 0          | 0          | 0          |
| k_Bacteria;p__Actinobacteria;c__Actinobacteria;o__Actinomycetales;f__Nakamurellaceae;g__                                | 0             | 0          | 0          | 0          | 0          | 0          | 0          | 0          | 0          | 0          | 0          | 0          | 0          | 0          | 0          |
| k_Bacteria;p__Actinobacteria;c__Actinobacteria;o__Actinomycetales;f__Nocardiaceae;g__                                   | 0             | 0          | 0          | 0          | 0          | 0          | 0          | 0          | 0          | 0          | 0          | 0          | 0          | 0          | 0          |
| k_Bacteria;p__Actinobacteria;c__Actinobacteria;o__Actinomycetales;f__Nocardiaceae;g__Rhodococcus                        | 0             | 0          | 0.00030664 | 0          | 0          | 0.000439   | 0          | 0.00010088 | 0          | 0          | 0          | 0          | 0          | 0          | 0          |
| k_Bacteria;p__Actinobacteria;c__Actinobacteria;o__Actinomycetales;f__Nocardioideaceae;g__                               | 0.00012984    | 4.47E-05   | 0          | 0          | 0          | 0.00024661 | 0          | 0          | 0.00716146 | 0          | 0          | 0          | 0          | 0          | 0          |
| k_Bacteria;p__Actinobacteria;c__Actinobacteria;o__Actinomycetales;f__Nocardioideaceae;g__Aeromicrobium                  | 0             | 0          | 0          | 0          | 0          | 0          | 0          | 0          | 0          | 0          | 0          | 0          | 0          | 0          | 0          |
| k_Bacteria;p__Actinobacteria;c__Actinobacteria;o__Actinomycetales;f__Nocardioideaceae;g__Friedmanniella                 | 0             | 0          | 0          | 0          | 0          | 0          | 0          | 0          | 0          | 0          | 0          | 0          | 0          | 0          | 0          |
| k_Bacteria;p__Actinobacteria;c__Actinobacteria;o__Actinomycetales;f__Nocardioideaceae;g__Nocardioides                   | 0             | 0          | 0          | 0          | 0          | 0          | 0          | 0          | 0          | 0          | 0          | 0          | 0          | 0          | 0          |
| k_Bacteria;p__Actinobacteria;c__Actinobacteria;o__Actinomycetales;f__Nocardioideaceae;g__Prompronionomas                | 0             | 0          | 0          | 0          | 0          | 0          | 0          | 0.00015132 | 0          | 0          | 0          | 0          | 0          | 0          | 0          |
| k_Bacteria;p__Actinobacteria;c__Actinobacteria;o__Actinomycetales;f__Prompronionomonosporaceae;g__Prompronionomonospora | 0             | 0          | 0          | 0          | 0          | 0          | 0          | 0          | 0          | 0          | 0          | 0          | 0          | 0          | 0          |
| k_Bacteria;p__Actinobacteria;c__Actinobacteria;o__Actinomycetales;f__Propionibacteriaceae;g__                           | 0             | 0          | 0          | 0          | 0          | 0          | 0          | 0          | 0          | 0          | 0          | 0          | 0          | 0          | 0          |
| k_Bacteria;p__Actinobacteria;c__Actinobacteria;o__Actinomycetales;f__Propionibacteriaceae;g__Propionibacterium          | 0.00095217    | 0.00142985 | 0.00034061 | 0.00035685 | 0.00443049 | 0.00580363 | 0.01694482 | 0.0009079  | 0.0006096  | 0.02799479 | 0.0162037  | 0.00020669 | 6.92E-05   | 9.84E-05   | 0.00027525 |
| k_Bacteria;p__Actinobacteria;c__Actinobacteria;o__Actinomycetales;f__Pseudonocardiaceae;g__Pseudonocardia               | 0             | 0          | 0          | 0          | 0          | 0          | 0          | 0          | 0          | 0          | 0          | 0          | 0          | 0          | 0          |
| k_Bacteria;p__Actinobacteria;c__Actinobacteria;o__Actinomycetales;f__Pseudonocardiaceae;g__Saccharopolyspora            | 0             | 0          | 0          | 0          | 0          | 0          | 0          | 0          | 0          | 0          | 0          | 0          | 0          | 0          | 0          |
| k_Bacteria;p__Actinobacteria;c__Actinobacteria;o__Actinomycetales;f__Sanguibacteraceae;g__Sanguibacter                  | 0             | 0          | 0          | 0          | 0          | 0          | 0          | 0          | 0          | 0          | 0          | 0          | 1.73E-05   | 0          | 0          |
| k_Bacteria;p__Actinobacteria;c__Actinobacteria;o__Actinomycetales;f__Sporichthyaceae;g__                                | 0             | 0.0002681  | 0          | 0          | 0          | 0          | 0          | 0          | 0          | 0          | 0          | 0          | 0          | 0          | 0          |
| k_Bacteria;p__Actinobacteria;c__Actinobacteria;o__Actinomycetales;f__Streptomycetaceae;g__                              | 0             | 0          | 0          | 0          | 0          | 0          | 0          | 0          | 0          | 0          | 0          | 0          | 0          | 0          | 0          |
| k_Bacteria;p__Actinobacteria;c__Actinobacteria;o__Actinomycetales;f__Williamsiaceae;g__Williamsia                       | 0             | 0          | 0          | 0          | 0          | 0          | 0          | 0          | 0          | 0          | 0          | 0          | 0          | 0          | 0          |
| k_Bacteria;p__Actinobacteria;c__Actinobacteria;o__Actinomycetales;f__Yaniellaceae;g__Aurilibacter                       | 0.00017312    | 0          | 0          | 0          | 0          | 0          | 0          | 0          | 0          | 0          | 0          | 0          | 0          | 0          | 0          |
| k_Bacteria;p__Actinobacteria;c__Actinobacteria;o__Bifidobacteriales;f__Bifidobacteriaceae;g__                           | 0             | 0          | 0          | 0          | 0          | 0          | 0          | 0          | 0          | 0          | 0          | 0          | 0          | 0          | 0          |
| k_Bacteria;p__Actinobacteria;c__Actinobacteria;o__Bifidobacteriales;f__Bifidobacteriaceae;g__Alloscardovia              | 0             | 0          | 0          | 0          | 0          | 0          | 0          | 0          | 0          | 0          | 0          | 0          | 0          | 0          | 0          |
| k_Bacteria;p__Actinobacteria;c__Actinobacteria;o__Bifidobacteriales;f__Bifidobacteriaceae;g__Bifidobacterium            | 0             | 0          | 0          | 0          | 0          | 0          | 0          | 0          | 0          | 0          | 0          | 0          | 0          | 0          | 0          |
| k_Bacteria;p__Actinobacteria;c__Actinobacteria;o__Bifidobacteriales;f__Bifidobacteriaceae;g__Gardnerella                | 0             | 0          | 0          | 0          | 0          | 0          | 0          | 0          | 0          | 0          | 0          | 0          | 0          | 1.64E-05   | 0          |
| k_Bacteria;p__Actinobacteria;c__Actinobacteria;o__Bifidobacteriales;f__Bifidobacteriaceae;g__Scardovia                  | 0             | 0          | 0          | 0          | 0          | 0          | 0          | 0          | 0          | 0          | 0          | 0          | 0          | 0          | 0          |
| k_Bacteria;p__Actinobacteria;c__Actinobacteria;o__WCHB1-81;f__A425_EubF1;g__                                            | 0             | 0          | 0          | 0          | 0          | 0          | 0          | 0          | 0          | 0          | 0          | 0          | 0          | 0          | 0          |
| k_Bacteria;p__Actinobacteria;c__Coriobacteriales;f__Coriobacteriaceae;g__Atopobium                                      | 0             | 0          | 0          | 0          | 0          | 0          | 0          | 0          | 0          | 0          | 0          | 0          | 0          | 0          | 0          |
| k_Bacteria;p__Actinobacteria;c__Rubrobacteriales;f__Rubrobacteraceae;g__Rubrobacter                                     | 0             | 0.00098302 | 0          | 0          | 0          | 0          | 0          | 0          | 0          | 0          | 0          | 0          | 0          | 0          | 0          |
| k_Bacteria;p__Actinobacteria;c__Thermoleophilales;f__Gaiellaceae;g__                                                    | 0             | 0          | 0.00022039 | 0          | 0          | 0          | 0          | 0          | 0          | 0.00186012 | 0          | 0          | 0          | 0          | 0          |
| k_Bacteria;p__Actinobacteria;c__Thermoleophilales;f__Solirubrobacteriales;f__Conexibacteraceae;g__                      | 0             | 0          | 0          | 0          | 0          | 0.0003206  | 0          | 0          | 0          | 0          | 0          | 0          | 0          | 0          | 0          |
| k_Bacteria;p__Actinobacteria;c__Thermoleophilales;f__Solirubrobacteriales;f__Patulibacteraceae;g__                      | 0             | 0          | 0          | 0          | 0          | 0          | 0          | 0          | 0          | 0          | 0          | 0          | 0          | 0          | 0          |
| k_Bacteria;p__Actinobacteria;c__Thermoleophilales;f__Solirubrobacteriales;f__Solirubrobacteraceae;g__                   | 0             | 0          | 0          | 0          | 0.00014797 | 0          | 0          | 0          | 0          | 0          | 0          | 0          | 0          | 0          | 0          |
| k_Bacteria;p__Actinobacteria;c__Thermoleophilales;f__Solirubrobacteriales;f__Solirubrobacter                            | 0             | 0          | 0          | 0          | 0          | 0          | 0          | 0          | 0          | 0          | 0          | 0          | 0          | 0          | 0          |
| k_Bacteria;p__Bacteroidetes;c__Bacteroidia;o__Bacteroidales;f__g__                                                      | 0             | 0          | 0          | 0          | 0          | 0          | 0          | 0          | 0          | 0          | 0          | 0          | 0          | 0          | 0          |
| k_Bacteria;p__Bacteroidetes;c__Bacteroidia;o__Bacteroidales;f__Bacteroidaceae;g__Bacteroides                            | 0             | 0.00016384 | 0          | 0          | 0          | 0          | 0          | 1.68E-05   | 0          | 0          | 0          | 0          | 0          | 0          | 0          |
| k_Bacteria;p__Bacteroidetes;c__Bacteroidia;o__Bacteroidales;f__Porphyromonadaceae;g__                                   | 0             | 0          | 0          | 0          | 0          | 0          | 0          | 0          | 0.00041168 | 0          | 0          | 0          | 0          | 0          | 0          |
| k_Bacteria;p__Bacteroidetes;c__Bacteroidia;o__Bacteroidales;f__Porphyromonadaceae;g__Paludibacter                       | 0             | 0          | 0          | 0          | 0          | 0          | 0          | 0          | 0          | 0          | 0          | 0          | 0          | 0          | 0          |
| k_Bacteria;p__Bacteroidetes;c__Bacteroidia;o__Bacteroidales;f__Porphyromonadaceae;g__Parabacteroides                    | 0             | 0          | 0          | 0          | 0          | 0          | 0          | 0          | 0          | 0          | 0          | 0          | 0          | 1.64E-05   | 0          |
| k_Bacteria;p__Bacteroidetes;c__Bacteroidia;o__Bacteroidales;f__Porphyromonadaceae;g__Porphyromonas                      | 0.00020198    | 0          | 0.00020036 | 0.00027755 | 0.00397478 | 0          | 0.00545484 | 0.00015972 | 0.0001425  | 0.00325521 | 0.00610269 | 0          | 1.73E-05   | 0          | 0.00012042 |
| k_Bacteria;p__Bacteroidetes;c__Bacteroidia;o__Bacteroidales;f__Prevotellaceae;g__Prevotella                             | 0.00014427    | 0.00047662 | 0          | 5.95E-05   | 0          | 0          | 0.00582623 | 0          | 0.00028501 | 0          | 0          | 0          | 0          | 0          | 0.00025805 |
| k_Bacteria;p__Bacteroidetes;c__Bacteroidia;o__Bacteroidales;f__Rikenellaceae;g__                                        | 0             | 0          | 0          | 0          | 0          | 0          | 0          | 0          | 0          | 0          | 0          | 0          | 0          | 0          | 0          |
| k_Bacteria;p__Bacteroidetes;c__Bacteroidia;o__Bacteroidales;f__SB-1;g__                                                 | 0             | 0          | 0          | 0          | 0          | 0          | 0          | 0          | 0          | 0          | 0          | 0          | 0          | 0          | 0          |
| k_Bacteria;p__Bacteroidetes;c__Bacteroidia;o__Bacteroidales;f__[Odoribacteraceae];g__Butyricimonas                      | 0             | 0          | 0          | 0          | 0          | 0          | 0          | 0          | 0          | 0          | 0          | 0          | 0          | 0          | 0          |
| k_Bacteria;p__Bacteroidetes;c__Bacteroidia;o__Bacteroidales;f__[Odoribacteraceae];g__Odoribacter                        | 0             | 0          | 0          | 0          | 0          | 0          | 0          | 0          | 0          | 0          | 0          | 0          | 0          | 0          | 0          |
| k_Bacteria;p__Bacteroidetes;c__Bacteroidia;o__Bacteroidales;f__[Paraprevotellaceae];g__[Prevotella]                     | 0             | 0          | 0          | 0          | 6.01E-05   | 0          | 0.00018907 | 0          | 0.00030084 | 0          | 0          | 0          | 0          | 0          | 0          |
| k_Bacteria;p__Bacteroidetes;c__Cytophagia;o__Cytophagales;f__Cyclobacteriaceae;g__                                      | 0             | 0          | 0          | 0          | 0          | 0          | 0          | 0          | 0          | 0          | 0          | 0          | 0          | 0          | 0          |
| k_Bacteria;p__Bacteroidetes;c__Cytophagia;o__Cytophagales;f__Cytophagaceae;g__                                          | 0             | 0          | 0.00016029 | 0          | 0          | 0          | 0          | 0          | 0          | 0          | 0          | 0          | 0          | 0          | 0          |
| k_Bacteria;p__Bacteroidetes;c__Cytophagia;o__Cytophagales;f__Cytophagaceae;g__Adhaeribacter                             | 0             | 8.94E-05   | 0          | 0          | 0          | 0          | 0          | 0          | 0          | 0          | 0          | 0          | 0          | 0          | 0          |
| k_Bacteria;p__Bacteroidetes;c__Cytophagia;o__Cytophagales;f__Cytophagaceae;g__Cytophaga                                 | 0             | 0          | 0          | 0          | 0          | 0          | 0          | 0          | 0          | 0          | 0          | 4.70E-05   | 0          | 0          | 0          |
| k_Bacteria;p__Bacteroidetes;c__Cytophagia;o__Cytophagales;f__Cytophagaceae;g__Hymenobacter                              | 0             | 0          | 0          | 0          | 0          | 0.00057543 | 0          | 0          | 0          | 0          | 0          | 0          | 0          | 0          | 1.72E-05   |
| k_Bacteria;p__Bacteroidetes;c__Cytophagia;o__Cytophagales;f__Cytophagaceae;g__Leadbetterella                            | 0             | 0.0005064  | 0          | 0          | 0          | 0          | 0          | 0          | 0          | 0          | 0          | 0          | 0          | 0          | 0          |
| k_Bacteria;p__Bacteroidetes;c__Cytophagia;o__Cytophagales;f__Cytophagaceae;g__Spirosoma                                 | 0             | 0          | 0          | 0          | 0          | 0          | 0          | 0          | 0.00031668 | 0          | 0          | 0          | 0          | 0          | 0          |
| k_Bacteria;p__Bacteroidetes;c__Cytophagia;o__Cytophagales;f__Flammeovirgaceae;g__                                       | 0.0007502     | 0.00020852 | 0.00026046 | 0          | 0.00040507 | 0.00194002 | 0          | 0.00021016 | 0          | 0          | 0          | 0.00049793 | 0.00032874 | 0.00018036 | 0.00015483 |
| k_Bacteria;p__Bacteroidetes;c__Cytophagia;o__Cytophagales;f__Flammeovirgaceae;g__TB248                                  | 0             | 0.00013405 | 0          | 0          | 0          | 0          | 0          | 0          | 0          | 0          | 0          | 0          | 0          | 0          | 0          |
| k_Bacteria;p__Bacteroidetes;c__Cytophagia;o__Cytophagales;f__Flammeovirgaceae;g__Roseivirga                             | 0.00030296    | 0          | 0.00022039 | 0          | 0          | 0          | 0          | 0          | 0          | 0          | 0          | 0          | 0          | 0          | 1.64E-05   |
| k_Bacteria;p__Bacteroidetes;c__Cytophagia;o__Cytophagales;f__[Amoebophila];g__SC3-56                                    | 0             | 0          | 0          | 0          | 0          | 0          | 0          | 0          | 0          | 0          | 0          | 0          | 0          | 0          | 0          |
| k_Bacteria;p__Bacteroidetes;c__Flavobacteriales;f__g__                                                                  | 0.00461661    | 0.00460232 | 0.00078139 | 0          | 0.00159498 | 0.00735729 | 0          | 0.00033626 | 0.00296884 | 9.30E-05   | 0          | 0.00234872 | 0.00371998 | 0.0025414  | 0.00202997 |
| k_Bacteria;p__Bacteroidetes;c__Flavobacteriales;f__Cryomorphaeae;g__                                                    | 0.02911347    | 0.02158177 | 0.00534952 | 0          | 0          | 0.00596804 | 0.0048049  | 0          | 0.00022959 | 0.00050501 | 0.00185079 | 0.00119385 | 0.00075422 | 0.00116981 | 0          |
| k_Bacteria;p__Bacteroidetes;c__Flavobacteriales;f__Cryomorphaeae;g__Crocinitomix                                        | 0             | 0          | 0          | 0          | 0          | 0          | 0          | 0.00043543 | 0          | 0          | 0.0005543  | 0.00019032 | 0.00018036 | 0.00017203 | 0          |
| k_Bacteria;p__Bacteroidetes;c__Flavobacteriales;f__Cryomorphaeae;g__Fluivicola                                          | 0.00137055    | 0.00150432 | 0.00096171 | 0          | 0.00081015 | 0.0037403  | 0          | 0.00016813 | 0.00145671 | 0          | 0          | 0.00356066 | 0.00325282 | 0.00500082 | 0.00345783 |
| k_Bacteria;p__Bacteroidetes;c__Flavobacteriales;f__Flavobacteriaceae;g__                                                | 0.02107769    | 0.01732201 | 0.00875558 | 0.00551128 | 0.01405099 | 0.05602229 | 0.0316845  | 0.03215475 | 0.02127272 | 0.02929688 | 0.00715488 | 0.05706448 | 0.03730362 | 0.05300869 | 0.03881023 |
| k_Bacteria;p__Bacteroidetes;c__Flavobacteriales;f__Flavobacteriaceae;g__Algibacter                                      | 0             | 0          | 0          | 0          | 0          | 0          | 0          | 0          | 0          | 0          | 0          | 0          | 0          | 0          | 0          |
| k_Bacteria;p__Bacteroidetes;c__Flavobacteriales;f__Flavobacteriaceae;g__Aquamarina                                      | 0             | 0          | 0          | 0          | 0          | 0          | 0          | 0          | 0          | 0          | 0          | 0          | 0          | 0          | 0          |
| k_Bacteria;p__Bacteroidetes;c__Flavobacteriales;f__Flavobacteriaceae;g__Bizionia                                        | 0             | 0          | 0          | 0          | 0          | 0          | 0          | 0          | 0          | 0          | 0          | 0          | 0          | 0          | 1.64E-05   |
| k_Bacteria;p__Bacteroidetes;c__Flavobacteriales;f__Flavobacteriaceae;g__Capnocytophaga                                  | 0             | 0          | 0          | 0          | 0          | 0          | 0.00162485 | 0          | 0          | 0          | 0          | 0          | 0          | 0          | 8.60E-05   |
| k_Bacteria;p__Bacteroidetes;c__Flavobacteriales;f__Flavobacteriaceae;g__Cellulophaga                                    | 0             | 0          | 0          | 0          | 0          | 0          | 0          | 0          | 0          | 0          | 0          | 0          | 0          | 0          | 0          |
| k_Bacteria;p__Bacteroidetes;c__Flavobacteriales;f__Flavobacteriaceae;g__Coccinimonas                                    | 0             | 0          | 0          | 0          | 0          | 0          | 0          | 0          | 0          | 0          | 0          | 0          | 0          | 0          | 1.64E-05   |
| k_Bacteria;p__Bacteroidetes;c__Flavobacteriales;f__Flavobacteriaceae;g__Flavobacterium                                  | 0.00952175    | 0.01465594 | 0.00446795 | 0.00138773 | 0.00764576 | 0.01992634 | 0.00680114 | 0.00474966 | 0.00843942 | 0.01032366 | 0.07744108 | 0.01153691 | 0.01382449 | 0.01421545 | 0.01278192 |
| k_Bacteria;p__Bacteroidetes;c__Flavobacteriales;f__Flavobacteriaceae;g__Formosa                                         | 0             | 0          | 0          | 0          | 0          | 0          | 0          | 0          | 0          | 0          | 0          | 1.88E-05   | 0          | 0          | 0          |
| k_Bacteria;p__Bacteroidetes;c__Flavobacteriales;f__Flavobacteriaceae;g__Gaebulibacter                                   | 0             | 0          | 0          | 0          | 0          | 0          | 0          | 0          | 0          | 0          | 0          | 0          | 0          | 0          | 1.72E-05   |
| k_Bacteria;p__Bacteroidetes;c__Flavobacteriales;f__Flavobacteriaceae;g__Gillisia                                        | 0             | 0          | 0</        |            |            |            |            |            |            |            |            |            |            |            |            |









| Taxon                                                                                                                 | 1180          |            | 1182       | 1183       | 1203       | 1211       | 1242       | 6475       | 6476       | 6477       | 1220       | 1221       | 1248       | 2032       | 2033       | 2034     |
|-----------------------------------------------------------------------------------------------------------------------|---------------|------------|------------|------------|------------|------------|------------|------------|------------|------------|------------|------------|------------|------------|------------|----------|
|                                                                                                                       | Copepod genus | Acartia    | Acartia    | Acartia    | Acartia    | Acartia    | Acartia    | Acartia    | Acartia    | Acartia    | Acartia    | Acartia    | Acartia    | Acartia    | Acartia    | Acartia  |
| Type of sample                                                                                                        | FullGut       | FullGut    | FullGut    | FullGut    | FullGut    | FullGut    | FullGut    | FullGut    | FullGut    | FullGut    | Starved    | Starved    | Starved    | Starved    | Starved    | Starved  |
| k_Bacteria;p__Proteobacteria;c__Betaproteobacteria;o__Burkholderiales;f__Oxalobacteraceae;g__Polynucleobacter         |               |            |            |            |            |            |            |            |            |            |            |            |            |            |            |          |
| k_Bacteria;p__Proteobacteria;c__Betaproteobacteria;o__Burkholderiales;f__Oxalobacteraceae;g__Ralstonia                | 8.66E-05      | 4.47E-05   | 0.0002036  | 0.00013877 | 0.00037976 | 0.00027127 | 0.00104454 | 2.52E-05   | 0.00061752 | 0.00176711 | 0.00063131 | 2.82E-05   | 0          | 1.64E-05   | 1.72E-05   |          |
| k_Bacteria;p__Proteobacteria;c__Betaproteobacteria;o__Elini6067;f__g__                                                |               | 0          | 0          | 0          | 0          | 0          | 0          | 0          | 0          | 0          | 0          | 0          | 0          | 0          | 0          | 0        |
| k_Bacteria;p__Proteobacteria;c__Betaproteobacteria;o__Methylophilales;f__Methylophilaceae;g__                         | 0.00190435    | 0.00144474 | 0.00026046 | 0          | 0          | 0.00512955 | 2.32E-05   | 0.00046236 | 0.00167838 | 0          | 0.00039458 | 0.00089972 | 0.00031153 | 0.00086016 |            |          |
| k_Bacteria;p__Proteobacteria;c__Betaproteobacteria;o__Methylophilales;f__Methylophilaceae;g__Methylotenera            |               |            |            |            |            |            |            |            |            |            |            |            |            |            |            |          |
| k_Bacteria;p__Proteobacteria;c__Betaproteobacteria;o__Neisseriales;f__Neisseriaceae;g__                               | 0.00067806    | 0.00038725 | 0          | 0          | 0.00037976 | 0          | 0.002298   | 8.41E-05   | 0.00016625 | 0.00483631 | 0.00210438 | 2.82E-05   | 0          | 1.64E-05   | 0          | 0        |
| k_Bacteria;p__Proteobacteria;c__Betaproteobacteria;o__Neisseriales;f__Neisseriaceae;g__Kingella                       |               | 0          | 0          | 0          | 0          | 0          | 0          | 0          | 0          | 0.00023751 | 0.00589226 | 0          | 0          | 0          | 0          | 0        |
| k_Bacteria;p__Proteobacteria;c__Betaproteobacteria;o__Neisseriales;f__Neisseriaceae;g__Microvirgula                   |               |            |            |            |            |            |            |            |            |            |            |            |            |            |            |          |
| k_Bacteria;p__Proteobacteria;c__Betaproteobacteria;o__Neisseriales;f__Neisseriaceae;g__Neisseria                      | 0             | 0.00028299 | 0.00022039 | 0          | 0          | 0          | 0.0019266  | 0.00049876 | 0.00325521 | 0          | 0          | 0          | 0          | 0          | 0          | 3.44E-05 |
| k_Bacteria;p__Proteobacteria;c__Betaproteobacteria;o__Nitrosomonadales;f__Nitrosomonadaceae;g__                       |               |            |            |            |            |            |            |            |            |            |            |            |            |            |            |          |
| k_Bacteria;p__Proteobacteria;c__Betaproteobacteria;o__Procabacteriales;f__Procabacteriaceae;g__                       |               | 0          | 0.00012021 | 0          | 0          | 0          | 0          | 0          | 0          | 0          | 0          | 0          | 0          | 0          | 0          | 0        |
| k_Bacteria;p__Proteobacteria;c__Betaproteobacteria;o__Rhodocyclales;f__Rhodocyclaceae;g__                             | 0.00502056    | 0.0067471  | 0.00194346 | 0          | 0          | 0.00499803 | 0.0019266  | 0.00030263 | 0.00188422 | 0          | 0.00736532 | 0.00328821 | 0.00508686 | 0.00365634 | 0.00576304 |          |
| k_Bacteria;p__Proteobacteria;c__Betaproteobacteria;o__Rhodocyclales;f__Rhodocyclaceae;g__Dechloromonas                |               |            |            |            |            |            |            |            |            |            |            |            |            |            |            |          |
| k_Bacteria;p__Proteobacteria;c__Betaproteobacteria;o__Rhodocyclales;f__Rhodocyclaceae;g__Hydrogenophilus              |               |            |            |            |            | 0.00051789 | 0          | 0          | 0          | 0.00297619 | 0          | 0          | 0          | 0          | 0          | 0        |
| k_Bacteria;p__Proteobacteria;c__Betaproteobacteria;o__Rhodocyclales;f__Rhodocyclaceae;g__Methyloversatilis            |               |            |            |            |            |            |            |            |            |            |            |            |            |            |            |          |
| k_Bacteria;p__Proteobacteria;c__Betaproteobacteria;o__Rhodocyclales;f__Rhodocyclaceae;g__Propionivibrio               |               |            |            |            |            |            |            | 8.41E-05   | 0          | 0          | 0          | 0          | 0          | 0          | 0          | 0        |
| k_Bacteria;p__Proteobacteria;c__Betaproteobacteria;o__Rhodocyclales;f__Rhodocyclaceae;g__Uliginosibacterium           |               |            |            |            |            |            |            |            |            |            |            |            |            |            |            |          |
| k_Bacteria;p__Proteobacteria;c__Betaproteobacteria;o__Rhodocyclales;f__Rhodocyclaceae;g__Zoogloea                     |               |            |            |            |            |            |            |            |            |            |            |            | 6.58E-05   | 0          | 0          | 0        |
| k_Bacteria;p__Proteobacteria;c__Betaproteobacteria;o__SC-l-84;f__g__                                                  |               |            |            |            |            |            |            |            |            |            |            |            |            |            |            |          |
| k_Bacteria;p__Proteobacteria;c__Betaproteobacteria;o__Tremblayales;f__g__                                             |               |            |            |            |            |            |            |            |            |            |            |            |            |            |            |          |
| k_Bacteria;p__Proteobacteria;c__Deltaproteobacteria;o__f__g__                                                         |               |            |            |            |            |            |            |            |            |            |            |            |            |            |            |          |
| k_Bacteria;p__Proteobacteria;c__Deltaproteobacteria;o__Bdellovibrionales;f__Bacteriovoracaceae;g__                    |               |            |            |            |            |            |            |            |            |            |            |            | 1.88E-05   | 5.19E-05   | 3.28E-05   | 6.88E-05 |
| k_Bacteria;p__Proteobacteria;c__Deltaproteobacteria;o__Bdellovibrionales;f__Bacteriovoracaceae;g__Bacteriovorax       |               |            |            |            |            | 0.00083848 | 0          | 3.36E-05   | 0.00011875 | 0          | 0          | 0.00060127 | 0          | 0          | 3.44E-05   |          |
| k_Bacteria;p__Proteobacteria;c__Deltaproteobacteria;o__Bdellovibrionales;f__Bdellovibrionaceae;g__Bdellovibrio        |               | 7.45E-05   | 0          | 0          | 0.00014797 | 0          | 0          | 0          | 0          | 0          | 0          | 0          | 0          | 0          | 0          | 0        |
| k_Bacteria;p__Proteobacteria;c__Deltaproteobacteria;o__Desulfarculales;f__Desulfarculaceae;g__                        |               |            |            |            |            |            |            |            |            |            |            |            |            |            |            |          |
| k_Bacteria;p__Proteobacteria;c__Deltaproteobacteria;o__Desulfobacterales;f__Desulfobacteraceae;g__                    |               |            |            |            |            |            |            |            |            |            |            |            |            |            |            |          |
| k_Bacteria;p__Proteobacteria;c__Deltaproteobacteria;o__Desulfobacterales;f__Desulfobacteraceae;g__Desulfococcus       |               |            |            |            |            |            |            |            |            |            |            |            |            |            |            |          |
| k_Bacteria;p__Proteobacteria;c__Deltaproteobacteria;o__Desulfobacterales;f__Desulfobacteraceae;g__Desulfosfrigus      |               |            |            |            |            |            |            |            |            |            |            |            |            |            |            |          |
| k_Bacteria;p__Proteobacteria;c__Deltaproteobacteria;o__Desulfobacterales;f__Desulfobacteraceae;g__Desulfosarcina      |               |            |            |            |            |            |            |            |            |            |            |            |            |            |            |          |
| k_Bacteria;p__Proteobacteria;c__Deltaproteobacteria;o__Desulfobacterales;f__Desulfobulbaceae;g__                      |               |            |            |            |            |            |            |            |            |            |            |            |            |            |            |          |
| k_Bacteria;p__Proteobacteria;c__Deltaproteobacteria;o__Desulfobacterales;f__Nitrospinaeae;g__Nitrospina               | 0.00017312    |            |            |            |            |            |            |            |            |            |            |            |            |            |            |          |
| k_Bacteria;p__Proteobacteria;c__Deltaproteobacteria;o__Desulfobivriales;f__Desulfobivriaceae;g__                      |               |            |            |            |            |            |            |            |            |            |            |            |            |            |            |          |
| k_Bacteria;p__Proteobacteria;c__Deltaproteobacteria;o__Desulfobivriales;f__Desulfobivriaceae;g__Desulfobivrio         |               |            |            |            |            |            |            |            |            |            |            |            |            |            |            |          |
| k_Bacteria;p__Proteobacteria;c__Deltaproteobacteria;o__Desulfuromonadales;f__Desulfuromonadaceae;g__                  |               |            |            |            |            |            |            |            |            |            |            |            |            |            |            |          |
| k_Bacteria;p__Proteobacteria;c__Deltaproteobacteria;o__Desulfuromonadales;f__Desulfuromonadaceae;g__Desulfuromusa     |               |            |            |            |            |            |            |            |            |            |            |            |            |            |            |          |
| k_Bacteria;p__Proteobacteria;c__Deltaproteobacteria;o__FAC87;f__g__                                                   |               |            |            |            |            | 0.00015619 | 0          | 0          | 0          | 0          | 0          | 0          | 0          | 0          | 0          | 0        |
| k_Bacteria;p__Proteobacteria;c__Deltaproteobacteria;o__MIZ46;f__g__                                                   |               |            |            |            |            | 0.00018907 | 0          | 0          | 0          | 0          | 0          | 0          | 0          | 0          | 0          | 0        |
| k_Bacteria;p__Proteobacteria;c__Deltaproteobacteria;o__Myxococcales;f__g__                                            |               |            |            | 1.98E-05   | 0          | 0.00016441 | 0.00157842 | 0          | 0          | 0          | 0          | 0          | 0          | 0          | 0          | 0        |
| k_Bacteria;p__Proteobacteria;c__Deltaproteobacteria;o__Myxococcales;f__0319-6G20;g__                                  |               |            |            | 0          | 0.00053166 | 0          | 0          | 0          | 0          | 0          | 0          | 0          | 0          | 0          | 0          | 0        |
| k_Bacteria;p__Proteobacteria;c__Deltaproteobacteria;o__Myxococcales;f__OM27;g__                                       |               |            |            | 5.95E-05   | 0          | 0          | 0          | 0          | 0          | 0          | 0          | 0          | 0          | 0          | 0          | 1.72E-05 |
| k_Bacteria;p__Proteobacteria;c__Deltaproteobacteria;o__N81-jf__g__                                                    |               |            |            | 0          | 0          | 0          | 0          | 0          | 0          | 0          | 0          | 0          | 0          | 0          | 0          | 0        |
| k_Bacteria;p__Proteobacteria;c__Deltaproteobacteria;o__N81-jf__JT838;g__                                              |               |            |            | 0          | 0          | 0          | 0          | 0          | 0          | 0          | 0          | 0          | 0          | 0          | 0          | 0        |
| k_Bacteria;p__Proteobacteria;c__Deltaproteobacteria;o__PB19;f__g__                                                    |               |            |            | 0          | 0          | 0          | 0          | 0          | 0          | 0.00021857 | 0          | 0          | 0          | 0          | 0          | 0        |
| k_Bacteria;p__Proteobacteria;c__Deltaproteobacteria;o__Sva0853;f__g__                                                 |               |            |            | 0          | 0          | 0          | 0          | 0          | 0          | 0          | 0          | 0          | 0          | 0          | 0          | 0        |
| k_Bacteria;p__Proteobacteria;c__Deltaproteobacteria;o__Sva0853;f__S25_1238;g__                                        |               |            |            | 0          | 0          | 0          | 0          | 0          | 0          | 0          | 0          | 0          | 0          | 0          | 0          | 0        |
| k_Bacteria;p__Proteobacteria;c__Deltaproteobacteria;o__Sva0853;f__SAR324;g__                                          |               |            | 0.00010018 | 0          | 0          | 0          | 0          | 0          | 0          | 0          | 0          | 0          | 0          | 0          | 0          | 0        |
| k_Bacteria;p__Proteobacteria;c__Deltaproteobacteria;o__Syntrophobacteriales;f__Syntrophobacteraceae;g__               |               |            |            | 0          | 0          | 0          | 0          | 0          | 0          | 0          | 0          | 0          | 0          | 0          | 0          | 0        |
| k_Bacteria;p__Proteobacteria;c__Epsilonproteobacteria;o__Campylobacteriales;f__Campylobacteraceae;g__Arcobacter       | 0.00158696    | 0.00087876 | 0.00108193 | 0          | 0          | 0.00101933 | 0          | 0          | 0          | 0          | 0          | 0          | 0.00010381 | 4.92E-05   | 3.44E-05   |          |
| k_Bacteria;p__Proteobacteria;c__Epsilonproteobacteria;o__Campylobacteriales;f__Campylobacteraceae;g__Campylobacter    |               |            |            | 0.0001586  | 0          | 0          | 0          | 0          | 0          | 0          | 0          | 0          | 0          | 0          | 0          | 0        |
| k_Bacteria;p__Proteobacteria;c__Epsilonproteobacteria;o__Campylobacteriales;f__Campylobacteraceae;g__Sulfurospirillum |               |            |            | 0          | 0          | 0          | 0          | 0          | 0          | 0          | 0          | 0          | 0          | 0          | 0          | 0        |
| k_Bacteria;p__Proteobacteria;c__Epsilonproteobacteria;o__Campylobacteriales;f__Helicobacteraceae;g__                  |               |            |            | 0          | 0          | 0          | 0          | 0          | 0          | 0          | 0          | 0          | 0          | 0          | 0          | 0        |
| k_Bacteria;p__Proteobacteria;c__Epsilonproteobacteria;o__Campylobacteriales;f__Helicobacteraceae;g__Sulfurimonas      |               |            |            | 0          | 0          | 0          | 0          | 0          | 0          | 0          | 0          | 0          | 0          | 0          | 0          | 0        |
| k_Bacteria;p__Proteobacteria;c__Epsilonproteobacteria;o__Campylobacteriales;f__Helicobacteraceae;g__Wolinella         |               |            |            | 0          | 0          | 0          | 0          | 0          | 0          | 0          | 0          | 0          | 0          | 0          | 0          | 0        |
| k_Bacteria;p__Proteobacteria;c__Gammaproteobacteria;o__f__g__                                                         | 0.0018755     | 0.0010426  | 0          | 5.95E-05   | 0.00101268 | 0.00039458 | 0          | 0          | 0          | 0          | 0.00462963 | 0.00945125 | 0.00029414 | 0.00013117 | 0.00048169 |          |
| k_Bacteria;p__Proteobacteria;c__Gammaproteobacteria;o__Aeromonadales;f__Aeromonadaceae;g__                            |               |            |            | 0          | 0          | 0          | 0          | 0          | 0          | 0          | 0          | 0          | 0          | 0          | 0          | 0        |
| k_Bacteria;p__Proteobacteria;c__Gammaproteobacteria;o__Aeromonadales;f__Aeromonadaceae;g__Aeromonas                   |               |            |            | 0          | 0          | 0          | 0          | 0          | 0          | 0          | 0          | 0          | 0          | 0          | 0          | 0        |
| k_Bacteria;p__Proteobacteria;c__Gammaproteobacteria;o__Aeromonadales;f__Aeromonadaceae;g__Tolunomas                   |               |            |            | 0          | 0          | 0          | 0          | 0          | 0          | 0          | 0          | 0          | 0          | 0          | 0          | 0        |
| k_Bacteria;p__Proteobacteria;c__Gammaproteobacteria;o__Alteromonadales;f__g__                                         | 0.00027411    |            |            | 0          | 1.98E-05   | 0          | 0          | 0          | 0          | 0          | 0          | 0          | 0.00011274 | 0          | 0          | 3.44E-05 |
| k_Bacteria;p__Proteobacteria;c__Gammaproteobacteria;o__Alteromonadales;f__Alteromonadaceae;g__                        | 0.0001587     | 1.49E-05   | 0.00018032 | 0.00033702 | 0.00189878 | 0.01762462 | 0          | 0.00079861 | 0.00185256 | 0          | 0.00841751 | 0.00316607 | 0.0077687  | 0.00623053 | 0.00856715 |          |
| k_Bacteria;p__Proteobacteria;c__Gammaproteobacteria;o__Alteromonadales;f__Alteromonadaceae;g__Alteromonas             |               | 1.49E-05   | 0          | 3.96E-05   | 0.0007342  | 0.01175523 | 0          | 0.00058845 | 0.00158338 | 0          | 0          | 0.00094888 | 0.00989688 | 0.00880472 | 0.00844673 |          |
| k_Bacteria;p__Proteobacteria;c__Gammaproteobacteria;o__Alteromonadales;f__Alteromonadaceae;g__BD2-13                  |               | 0          | 0          | 0          | 0          | 0.0012084  | 0          | 0          | 0          | 0          | 0          | 0.00049793 | 0          | 0          | 1.72E-05   |          |
| k_Bacteria;p__Proteobacteria;c__Gammaproteobacteria;o__Alteromonadales;f__Alteromonadaceae;g__Candidatus Endobugula   |               | 0.00031278 | 0          | 0          | 0          | 0          | 0          | 0          | 0          | 0          | 0          | 1.88E-05   | 0          | 0          | 0          | 0        |
| k_Bacteria;p__Proteobacteria;c__Gammaproteobacteria;o__Alteromonadales;f__Alteromonadaceae;g__Cellvibrio              |               | 0.00087876 | 0          | 0          | 0          | 0          | 0          | 0          | 0          | 0          | 0          | 0          | 0          | 0          | 0          | 0        |
| k_Bacteria;p__Proteobacteria;c__Gammaproteobacteria;o__Alteromonadales;f__Alteromonadaceae;g__Glaciecola              | 0.0406117     | 0.05074471 | 0.01458596 | 0.00049562 | 0.00086078 | 0.07584177 | 0.00120703 | 0.10734221 | 0.27654538 | 0          | 0.00989057 | 0.22480059 | 0.19921794 | 0.07399574 | 0.17875759 |          |
| k_Bacteria;p__Proteobacteria;c__Gammaproteobacteria;o__Alteromonadales;f__Alteromonadaceae;g__HTCC2207                | 0.01809132    | 0.0191689  | 0.00322574 | 9.91E-05   | 0.0007888  | 0.00642838 | 0          | 0          | 0.00029293 | 0          | 0          | 0.0106162  | 0.00034604 | 0.00018036 | 0.00025805 |          |
| k_Bacteria;p__Proteobacteria;c__Gammaproteobacteria;o__Alteromonadales;f__Alteromonadaceae;g__Marinobacter            |               |            |            | 0          | 0          | 0.00211265 | 0          | 0.0002606  | 0.00238299 | 0.00223214 | 0          | 0.00071401 | 0.00583085 | 0.00723069 | 0.02306938 |          |
| k_Bacteria;p__Proteobacteria;c__Gammaproteobacteria;o__Alteromonadales;f__Alteromonadaceae;g__Porficoccus             |               |            |            | 0          | 0          | 0          | 0          | 0          | 0          | 0          | 0          | 0          | 0          | 0          | 0          | 0        |
| k_Bacteria;p__Proteobacteria;c__Gammaproteobacteria;o__Alteromonadales;f__Alteromonadaceae;g__Spongilbacter           |               |            |            | 0          | 0          | 0          | 0          | 0          | 0          | 0          | 0          | 0          | 0          | 0          | 0          | 0        |
| k_Bacteria;p__Proteobacteria;c__Gammaproteobacteria;o__Alteromonadales;f__Alteromonadaceae;g__ZD0117                  | 0.00040395    | 0          | 0          | 0          | 0          | 0.00120018 | 0          | 0          | 0          | 0          | 0.00033822 | 0.00295868 | 0.00021315 | 0.00216759 |            |          |
| k_Bacteria;p__Proteobacteria;c__Gammaproteobacteria;o__Alteromonadales;f__Alteromonadaceae;g__nsmpV118                |               |            |            | 0          | 0          | 0          | 0          | 0          | 0          | 0          | 0          | 0          | 0          | 0          | 0          | 0        |
| k_Bacteria;p__Proteobacteria;c__Gammaproteobacteria;o__Alteromonadales;f__Colwelliaceae;g__                           | 0.00991127    | 0.00758117 | 0.01839274 | 0.00204195 | 0.00951923 | 0.02961002 | 0          | 0.0003698  |            |            |            |            |            |            |            |          |

| Taxon                                                                                                                 | 1180       | 1182       | 1183       | 1203       | 1211        | 1242       | 6475       | 6476       | 6477       | 1220       | 1221       | 1248       | 2032       | 2033       | 2034       |            |
|-----------------------------------------------------------------------------------------------------------------------|------------|------------|------------|------------|-------------|------------|------------|------------|------------|------------|------------|------------|------------|------------|------------|------------|
| Copepod genus                                                                                                         | Acartia    | Acartia    | Acartia    | Acartia    | Acartia     | Acartia    | Acartia    | Acartia    | Acartia    | Acartia    | Acartia    | Acartia    | Acartia    | Acartia    | Acartia    |            |
| Type of sample                                                                                                        | FullGut    | FullGut    | FullGut    | FullGut    | FullGut     | FullGut    | FullGut    | FullGut    | FullGut    | Starved    | Starved    | Starved    | Starved    | Starved    | Starved    |            |
| k_Bacteria;p__Proteobacteria;c__Gammaproteobacteria;o__Alteromonadales;f__HTCC2188;g__HTCC                            | 0.00040395 | 7.45E-05   | 0.00036064 | 0          | 0           | 0.00043568 | 0          | 0          | 0          | 0          | 0          | 0          | 0.00029124 | 0.00051907 | 1.64E-05   | 0.00075694 |
| k_Bacteria;p__Proteobacteria;c__Gammaproteobacteria;o__Alteromonadales;f__Idiomarinaeae;g__Idiomarina                 | 7.21E-05   | 0          | 0          | 0          | 0           | 0.00244969 | 0          | 0.00029423 | 0.00044335 | 0          | 0          | 0          | 0.00027245 | 8.65E-05   | 0.00026234 | 0.00030966 |
| k_Bacteria;p__Proteobacteria;c__Gammaproteobacteria;o__Alteromonadales;f__Moritellaceae;g__Moritella                  | 0          | 0          | 0.00010018 | 0.00040507 | 0.00046034  | 0          | 0          | 0          | 0          | 0          | 0          | 0          | 0          | 0          | 3.46E-05   | 0          |
| k_Bacteria;p__Proteobacteria;c__Gammaproteobacteria;o__Alteromonadales;f__OM60;g__                                    | 0.00275554 | 0.00190646 | 0.00144257 | 9.91E-05   | 0.00457878  | 0.00603514 | 0.00169811 | 0.00258883 | 0          | 0.003367   | 0.00098646 | 0.00057097 | 0.00090179 | 0.00043008 | 0          | 0          |
| k_Bacteria;p__Proteobacteria;c__Gammaproteobacteria;o__Alteromonadales;f__OM60;g__Congregibacter                      | 0          | 0          | 0          | 0          | 0           | 0          | 0          | 0          | 0          | 0          | 0          | 0          | 0          | 0          | 0          | 0          |
| k_Bacteria;p__Proteobacteria;c__Gammaproteobacteria;o__Alteromonadales;f__Psychromonadaeae;g__Psychromonas            | 0.00038953 | 0          | 0.00042075 | 0.00019825 | 0           | 0.00082204 | 0          | 0          | 0          | 0          | 0          | 0          | 0.00010381 | 0          | 3.44E-05   | 0          |
| k_Bacteria;p__Proteobacteria;c__Gammaproteobacteria;o__Alteromonadales;f__Shewanellaceae;g__Shewanella                | 0.00030296 | 0          | 0.0042676  | 0          | 0.00028772  | 0          | 0          | 0          | 0          | 0          | 0          | 0          | 5.64E-05   | 0.00022493 | 9.84E-05   | 8.60E-05   |
| k_Bacteria;p__Proteobacteria;c__Gammaproteobacteria;o__Alteromonadales;f__[Chromatiaceae];g__                         | 0          | 0          | 0          | 0          | 0           | 0          | 0          | 0          | 0          | 0          | 0          | 0          | 0          | 0          | 0          | 0          |
| k_Bacteria;p__Proteobacteria;c__Gammaproteobacteria;o__Alteromonadales;f__[Chromatiaceae];g__Rheinheimeria            | 0          | 0.00434912 | 0          | 5.95E-05   | 0           | 0          | 0          | 0          | 0          | 0          | 0          | 0          | 0          | 9.39E-06   | 0          | 0          |
| k_Bacteria;p__Proteobacteria;c__Gammaproteobacteria;o__Cardiobacteriales;f__Cardiobacteriaceae;g__Cardiobacterium     | 0          | 0          | 0          | 0          | 0           | 0          | 0          | 0          | 0          | 0          | 0          | 0          | 0          | 0          | 0          | 0          |
| k_Bacteria;p__Proteobacteria;c__Gammaproteobacteria;o__Chromatiales;f__[g__                                           | 0.00014427 | 0          | 0          | 0          | 0           | 0          | 0          | 0          | 7.92E-05   | 0          | 0          | 0          | 0          | 0          | 0          | 0          |
| k_Bacteria;p__Proteobacteria;c__Gammaproteobacteria;o__Chromatiales;f__Chromatiaceae;g__                              | 0          | 0          | 0          | 0          | 0           | 0          | 0          | 0          | 0          | 0          | 0          | 0          | 0          | 0          | 0          | 0          |
| k_Bacteria;p__Proteobacteria;c__Gammaproteobacteria;o__Enterobacteriales;f__Enterobacteriaceae;g__                    | 5.77E-05   | 0          | 0.00021807 | 7.60E-05   | 9.04E-05    | 0.00276224 | 2.52E-05   | 1.58E-05   | 0.00297619 | 0.00273569 | 0          | 0          | 0          | 0          | 0          | 0          |
| k_Bacteria;p__Proteobacteria;c__Gammaproteobacteria;o__Enterobacteriales;f__Enterobacteriaceae;g__Enterobacter        | 2.89E-05   | 0          | 0          | 0          | 0           | 0          | 0          | 0          | 0          | 0          | 0          | 0          | 0          | 0          | 0          | 0          |
| k_Bacteria;p__Proteobacteria;c__Gammaproteobacteria;o__Enterobacteriales;f__Enterobacteriaceae;g__Erwinia             | 0.00012984 | 0          | 0          | 0          | 0           | 0          | 0          | 0          | 0          | 0          | 0          | 0          | 0          | 0          | 0          | 0          |
| k_Bacteria;p__Proteobacteria;c__Gammaproteobacteria;o__Enterobacteriales;f__Enterobacteriaceae;g__Escherichia         | 0          | 0          | 0          | 0          | 0           | 0          | 0          | 0          | 0          | 0          | 0          | 0          | 0          | 0          | 0          | 0          |
| k_Bacteria;p__Proteobacteria;c__Gammaproteobacteria;o__Enterobacteriales;f__Enterobacteriaceae;g__Ewingella           | 0          | 0          | 0          | 0          | 0           | 0          | 0          | 0          | 0          | 0          | 0          | 0          | 0          | 0          | 0          | 1.72E-05   |
| k_Bacteria;p__Proteobacteria;c__Gammaproteobacteria;o__Enterobacteriales;f__Enterobacteriaceae;g__Glucuronacetobacter | 0          | 0          | 0          | 0          | 0.00058365  | 0.00408533 | 0.00028582 | 0.00088669 | 0          | 0          | 0          | 4.70E-05   | 0          | 3.28E-05   | 0          | 0          |
| k_Bacteria;p__Proteobacteria;c__Gammaproteobacteria;o__Enterobacteriales;f__Enterobacteriaceae;g__Klebsiella          | 0          | 0          | 0          | 0          | 0           | 0          | 0          | 0          | 0          | 0          | 0          | 0          | 0          | 0          | 0          | 0          |
| k_Bacteria;p__Proteobacteria;c__Gammaproteobacteria;o__Enterobacteriales;f__Enterobacteriaceae;g__Pantoea             | 0          | 0          | 0          | 0          | 0           | 0          | 0          | 0          | 0          | 0          | 0          | 0          | 0          | 0          | 0          | 0          |
| k_Bacteria;p__Proteobacteria;c__Gammaproteobacteria;o__Enterobacteriales;f__Enterobacteriaceae;g__Salmonella          | 0          | 0          | 0          | 0          | 0           | 0          | 0          | 0          | 0          | 0          | 0          | 0          | 0          | 0          | 0          | 0          |
| k_Bacteria;p__Proteobacteria;c__Gammaproteobacteria;o__Enterobacteriales;f__Enterobacteriaceae;g__Serratia            | 0          | 0          | 0          | 0          | 0           | 0          | 0          | 1.68E-05   | 0          | 0          | 0          | 0          | 0          | 0          | 0          | 0          |
| k_Bacteria;p__Proteobacteria;c__Gammaproteobacteria;o__HTCC2188;f__HTCC2089;g__                                       | 0.00148597 | 0.00177242 | 0.00014025 | 0          | 0.00187426  | 0.01067676 | 0          | 0.00050668 | 0          | 0.00021044 | 0.0003664  | 0.00027684 | 0.00026234 | 0.00020644 | 0          | 0          |
| k_Bacteria;p__Proteobacteria;c__Gammaproteobacteria;o__HTCC2188;f__HTCC2089;g__Acinetobacter                          | 0          | 0          | 0          | 0          | 0           | 0          | 0          | 0          | 0          | 0          | 0          | 0          | 0          | 0          | 0          | 0          |
| k_Bacteria;p__Proteobacteria;c__Gammaproteobacteria;o__Legionellales;f__[g__                                          | 0          | 0          | 0          | 0          | 0           | 0          | 0          | 0          | 0          | 0          | 0          | 0          | 0          | 0          | 0          | 0          |
| k_Bacteria;p__Proteobacteria;c__Gammaproteobacteria;o__Legionellales;f__Coxiellaceae;g__                              | 0          | 0          | 0          | 0          | 0           | 0          | 0          | 0          | 0          | 0          | 0          | 0          | 0          | 0          | 0          | 0          |
| k_Bacteria;p__Proteobacteria;c__Gammaproteobacteria;o__Legionellales;f__Francisellaceae;g__                           | 0.00025968 | 0          | 0          | 0          | 0.00028772  | 0          | 0          | 0          | 0          | 0          | 0          | 0          | 0          | 0          | 0          | 0          |
| k_Bacteria;p__Proteobacteria;c__Gammaproteobacteria;o__Legionellales;f__Legionellaceae;g__                            | 0          | 0          | 0          | 0          | 0           | 0          | 5.88E-05   | 0.00037209 | 0          | 0          | 0          | 5.64E-05   | 0          | 1.64E-05   | 0          | 0          |
| k_Bacteria;p__Proteobacteria;c__Gammaproteobacteria;o__Legionellales;f__Legionellaceae;g__Legionella                  | 0          | 0          | 0          | 0          | 0           | 0          | 0          | 0          | 0          | 0          | 0          | 0          | 0          | 0          | 0          | 0          |
| k_Bacteria;p__Proteobacteria;c__Gammaproteobacteria;o__Methylococcales;f__[g__                                        | 0          | 0          | 0          | 0          | 0           | 0          | 0          | 0          | 0          | 0          | 0          | 0          | 0          | 0          | 0          | 0          |
| k_Bacteria;p__Proteobacteria;c__Gammaproteobacteria;o__Oceanospirillales;f__[g__                                      | 0.00272668 | 0.00463211 | 0.00138246 | 0          | 0.00016444  | 0          | 0          | 0.00045126 | 0          | 0          | 1.88E-05   | 0.00022493 | 0.00031153 | 0.00020644 | 0          | 0          |
| k_Bacteria;p__Proteobacteria;c__Gammaproteobacteria;o__Oceanospirillales;f__Alcanivoracaceae;g__Alcanivorax           | 0          | 0          | 0          | 0          | 0.00039458  | 0          | 0.00025219 | 0          | 0          | 0          | 9.39E-06   | 0.00010381 | 6.56E-05   | 6.88E-05   | 0          | 0          |
| k_Bacteria;p__Proteobacteria;c__Gammaproteobacteria;o__Oceanospirillales;f__Endozoicomonas                            | 0          | 0          | 0          | 0          | 0           | 0          | 0          | 0          | 0          | 0          | 0          | 0          | 0          | 0          | 0          | 0          |
| k_Bacteria;p__Proteobacteria;c__Gammaproteobacteria;o__Oceanospirillales;f__Halomonadaceae;g__                        | 0          | 0          | 0          | 0          | 0.000320597 | 0          | 0.00117691 | 0.002668   | 0          | 0          | 0.00096767 | 0.00238771 | 0.00444335 | 0.00213319 | 0          | 0          |
| k_Bacteria;p__Proteobacteria;c__Gammaproteobacteria;o__Oceanospirillales;f__Halomonadaceae;g__Candidatus Portiera     | 0.07509197 | 0.0858046  | 0.01711046 | 0          | 0.01778081  | 0.01158283 | 0.00287501 | 0.00615143 | 0          | 0.00441919 | 0.00657492 | 0.0061596  | 0.00180357 | 0.00562542 | 0          | 0          |
| k_Bacteria;p__Proteobacteria;c__Gammaproteobacteria;o__Oceanospirillales;f__Halomonadaceae;g__Cobetia                 | 0          | 0          | 0          | 0          | 0           | 0          | 0          | 0          | 0          | 0          | 0          | 0          | 0          | 0          | 0          | 0          |
| k_Bacteria;p__Proteobacteria;c__Gammaproteobacteria;o__Oceanospirillales;f__Halomonadaceae;g__Haererehalobacter       | 0          | 0          | 0          | 0          | 0.00013975  | 0          | 0          | 0          | 0          | 0          | 0          | 0          | 0          | 0          | 0          | 0          |
| k_Bacteria;p__Proteobacteria;c__Gammaproteobacteria;o__Oceanospirillales;f__Halomonadaceae;g__Halomonas               | 0.00024526 | 0          | 0          | 0.00116459 | 0.00466921  | 0          | 0.00040351 | 0.00412471 | 0          | 0          | 0.00035701 | 0.00031144 | 0.00059026 | 0.00693286 | 0          | 0          |
| k_Bacteria;p__Proteobacteria;c__Gammaproteobacteria;o__Oceanospirillales;f__Oceanospirillaceae;g__                    | 0.00780495 | 0.00612154 | 0.00254453 | 0.00027755 | 0.00041102  | 0          | 0          | 0          | 0          | 0.00904882 | 0.00179442 | 0.00058828 | 0.00022955 | 0.0104939  | 0          | 0          |
| k_Bacteria;p__Proteobacteria;c__Gammaproteobacteria;o__Oceanospirillales;f__Oceanospirillaceae;g__Amphritea           | 0          | 0          | 0          | 0          | 0           | 0          | 0          | 0          | 0          | 0          | 0          | 0          | 0          | 0          | 0          | 0          |
| k_Bacteria;p__Proteobacteria;c__Gammaproteobacteria;o__Oceanospirillales;f__Oceanospirillaceae;g__Marinobacterium     | 0          | 0          | 0          | 0          | 0           | 0          | 0          | 0          | 0          | 0          | 0          | 0          | 0          | 0          | 0          | 0          |
| k_Bacteria;p__Proteobacteria;c__Gammaproteobacteria;o__Oceanospirillales;f__Oceanospirillaceae;g__Marinomonas         | 0.00108202 | 0.00090855 | 0.00116207 | 9.91E-05   | 0.00549381  | 0.00287715 | 0.0034586  | 0.00258079 | 0.00590601 | 0          | 0.00862795 | 0.14174989 | 0.00337394 | 0.00304968 | 0.00485128 | 0          |
| k_Bacteria;p__Proteobacteria;c__Gammaproteobacteria;o__Oceanospirillales;f__Oceanospirillaceae;g__Nephtunomonas       | 0          | 0          | 0          | 0          | 0           | 0          | 0          | 0          | 0          | 0          | 0          | 0          | 0          | 0          | 0          | 0          |
| k_Bacteria;p__Proteobacteria;c__Gammaproteobacteria;o__Oceanospirillales;f__Oceanospirillaceae;g__Oceanispermotilla   | 0.00024526 | 0.00031278 | 8.01E-05   | 0          | 0           | 0          | 0          | 0          | 0          | 0          | 0          | 0          | 0          | 0          | 0          | 0          |
| k_Bacteria;p__Proteobacteria;c__Gammaproteobacteria;o__Oceanospirillales;f__Oceanospirillaceae;g__Oleibacter          | 0.00075002 | 1.49E-05   | 0          | 0.04656834 | 0.01202562  | 0.0310075  | 0          | 0.0003951  | 0.00076002 | 0.17317708 | 0.1635101  | 0.00954519 | 0.00098623 | 0.00059026 | 0.0103219  | 0          |
| k_Bacteria;p__Proteobacteria;c__Gammaproteobacteria;o__Oceanospirillales;f__Oceanospirillaceae;g__Oleispira           | 0.00786266 | 0.00695562 | 0.00390695 | 0          | 0.00017263  | 0          | 0          | 0          | 0          | 0          | 0          | 0.00217022 | 0.00019032 | 0.00024594 | 0.00027525 | 0          |
| k_Bacteria;p__Proteobacteria;c__Gammaproteobacteria;o__Oceanospirillales;f__Oceanospirillaceae;g__Spongispira         | 0          | 0          | 0          | 0          | 0           | 0          | 0          | 0          | 0          | 0          | 0          | 0          | 0          | 0          | 0          | 0          |
| k_Bacteria;p__Proteobacteria;c__Gammaproteobacteria;o__Oceanospirillales;f__Oleiphilaceae;g__                         | 0          | 0          | 0          | 0          | 0.00145502  | 0          | 8.41E-05   | 0          | 0.00251116 | 0          | 0.00050732 | 3.46E-05   | 6.56E-05   | 0.00012042 | 0          | 0          |
| k_Bacteria;p__Proteobacteria;c__Gammaproteobacteria;o__Oceanospirillales;f__SUP05;g__                                 | 0.00942076 | 0.01042598 | 0.00366653 | 0          | 7.40E-05    | 0          | 2.52E-05   | 0.00036418 | 0          | 0          | 0.00010334 | 0          | 1.64E-05   | 3.44E-05   | 0          | 0          |
| k_Bacteria;p__Proteobacteria;c__Gammaproteobacteria;o__Oceanospirillales;f__Saccharospirillaceae;g__Reinekea          | 0          | 0          | 0          | 0          | 0           | 0          | 0          | 0          | 0          | 0          | 0          | 3.76E-05   | 0          | 0          | 0          | 0          |
| k_Bacteria;p__Proteobacteria;c__Gammaproteobacteria;o__Oceanospirillales;f__Saccharospirillaceae;g__Saccharospirillum | 0          | 0          | 0          | 0          | 0           | 0          | 0          | 0          | 0          | 0          | 0          | 0          | 0          | 0          | 0          | 0          |
| k_Bacteria;p__Proteobacteria;c__Gammaproteobacteria;o__Pasteurellales;f__Pasteurellaceae;g__Actinobacillus            | 0          | 0          | 3.96E-05   | 0          | 0           | 0          | 0          | 0          | 0          | 0          | 0          | 0          | 0          | 0          | 0          | 3.44E-05   |
| k_Bacteria;p__Proteobacteria;c__Gammaproteobacteria;o__Pasteurellales;f__Pasteurellaceae;g__Aggregatibacter           | 0          | 0          | 0          | 0          | 0           | 0          | 8.41E-05   | 0          | 0          | 0          | 0          | 0          | 0          | 0          | 0          | 0          |
| k_Bacteria;p__Proteobacteria;c__Gammaproteobacteria;o__Pasteurellales;f__Pasteurellaceae;g__Haemophilus               | 0.00057708 | 0          | 0          | 0.00025317 | 0           | 0          | 5.04E-05   | 0.00011084 | 0          | 0.00252525 | 2.82E-05   | 0          | 0          | 0          | 0.00018923 | 0          |
| k_Bacteria;p__Proteobacteria;c__Gammaproteobacteria;o__Pseudomonadales;f__Moraxellaceae;g__                           | 0.00056265 | 0.00017873 | 0          | 0.00267634 | 0.02291197  | 0.03777292 | 0.04466006 | 0.00166448 | 0.00792482 | 0.140625   | 0.1121633  | 0.00492292 | 0.00264724 | 0.00477127 | 0.00175472 | 0          |
| k_Bacteria;p__Proteobacteria;c__Gammaproteobacteria;o__Pseudomonadales;f__Moraxellaceae;g__Alkanindiges               | 0.00028854 | 0.00728329 | 0.00040071 | 3.96E-05   | 0.00045571  | 0.00042746 | 0.00304078 | 8.41E-06   | 0          | 0          | 0.00589226 | 1.88E-05   | 1.73E-05   | 0          | 5.16E-05   | 0          |
| k_Bacteria;p__Proteobacteria;c__Gammaproteobacteria;o__Pseudomonadales;f__Moraxellaceae;g__Alkanindiges               | 0          | 0          | 0          | 0          | 0           | 0          | 0          | 0          | 0          | 0          | 0          | 0          | 0          | 0          | 0          | 0          |
| k_Bacteria;p__Proteobacteria;c__Gammaproteobacteria;o__Pseudomonadales;f__Moraxellaceae;g__Enhydrobacter              | 0          | 0          | 3.96E-05   | 0          | 0           | 0          | 0          | 0.00031104 | 0          | 0          | 0          | 0          | 0          | 0          | 0          | 0          |
| k_Bacteria;p__Proteobacteria;c__Gammaproteobacteria;o__Pseudomonadales;f__Moraxellaceae;g__Perlucidibaca              | 0          | 1.49E-05   | 0          | 0.00120931 | 0.02438036  | 0.02074017 | 0.00933126 | 0.00036988 | 0.00218507 | 0.07710193 | 0.02546296 | 0.00795746 | 0.00221469 | 0.00831284 | 0.00153108 | 0          |
| k_Bacteria;p__Proteobacteria;c__Gammaproteobacteria;o__Pseudomonadales;f__Moraxellaceae;g__Psychrobacter              | 0.00028854 | 0.00034257 | 2.00E-05   | 0.00025772 | 0.00086078  | 0.00048501 | 0          | 0          | 0          | 0.00688244 | 0.00399832 | 0          | 0          | 0          | 0          | 0          |
| k_Bacteria;p__Proteobacteria;c__Gammaproteobacteria;o__Pseudomonadales;f__Pseudomonadaceae;g__Pseudomonas             | 0.0002164  | 0.00165326 | 0.00038068 | 0.00019825 | 0.0         |            |            |            |            |            |            |            |            |            |            |            |









| Taxon                                                                                                            | 1231        | 1233       | 1234       | 1235       | 1236        | 1243        | 1244        | 6473        | 6474        | 1188        | 1189        | 1190        | 1226        | 1227        | 2027        |
|------------------------------------------------------------------------------------------------------------------|-------------|------------|------------|------------|-------------|-------------|-------------|-------------|-------------|-------------|-------------|-------------|-------------|-------------|-------------|
| Copepod genus                                                                                                    | Calanus     | Calanus    | Calanus    | Calanus    | Calanus     | Centropages | Centropages | Centropages | Centropages | Centropages | Centropages | Centropages | Centropages | Centropages | Centropages |
| Type of sample                                                                                                   | FullGut     | FullGut    | FullGut    | FullGut    | FullGut     | FullGut     | FullGut     | FullGut     | FullGut     | Starved     | Starved     | Starved     | Starved     | Starved     | Starved     |
| k_Bacteria;p__Bacteroidetes;c__Flavobacteriia;o__Flavobacteriales;f__Flavobacteriaceae;g__Lacinutrix             |             |            | 0          | 0          |             |             |             |             |             |             |             |             |             |             |             |
| k_Bacteria;p__Bacteroidetes;c__Flavobacteriia;o__Flavobacteriales;f__Flavobacteriaceae;g__Leeuwenhoeekiella      |             |            | 0.00067978 | 0          |             | 1.28E-05    | 3.52E-05    | 0.00013616  |             |             |             |             |             |             | 6.55E-05    |
| k_Bacteria;p__Bacteroidetes;c__Flavobacteriia;o__Flavobacteriales;f__Flavobacteriaceae;g__Lutimonas              |             |            | 0          | 0          |             |             |             |             |             |             |             |             |             |             |             |
| k_Bacteria;p__Bacteroidetes;c__Flavobacteriia;o__Flavobacteriales;f__Flavobacteriaceae;g__Maribacter             |             |            | 0.0003273  | 0          |             | 0.00015403  | 0.00022886  |             |             |             |             |             |             |             |             |
| k_Bacteria;p__Bacteroidetes;c__Flavobacteriia;o__Flavobacteriales;f__Flavobacteriaceae;g__Mesonia                |             |            | 0          | 0          |             | 0.00029927  |             |             |             |             |             |             |             |             | 0.00011465  |
| k_Bacteria;p__Bacteroidetes;c__Flavobacteriia;o__Flavobacteriales;f__Flavobacteriaceae;g__Olleya                 | 0.00029342  |            | 0.00133439 | 0          |             | 0.00020289  | 8.80E-05    | 0.00050751  |             |             |             | 0.00077177  | 0.0008088   |             | 0.0026861   |
| k_Bacteria;p__Bacteroidetes;c__Flavobacteriia;o__Flavobacteriales;f__Flavobacteriaceae;g__Persicivirga           |             |            | 0          | 0          |             | 0.00020538  |             |             |             |             |             |             |             |             | 0.00044222  |
| k_Bacteria;p__Bacteroidetes;c__Flavobacteriia;o__Flavobacteriales;f__Flavobacteriaceae;g__Polaribacter           | 0.00344106  | 0.00345743 | 0.00122109 | 0.00141189 | 0.00732935  | 0.00352088  | 0.00342881  |             |             | 0.00928203  | 0.02201676  | 0.04094249  | 0.01303703  | 0.00880967  | 0.0022275   |
| k_Bacteria;p__Bacteroidetes;c__Flavobacteriia;o__Flavobacteriales;f__Flavobacteriaceae;g__Pontirhabdus           |             |            | 0          | 0          |             |             |             |             |             |             |             |             |             |             |             |
| k_Bacteria;p__Bacteroidetes;c__Flavobacteriia;o__Flavobacteriales;f__Flavobacteriaceae;g__Psychroserpens         |             |            | 0          | 0.00070595 | 0.0001797   |             | 1.24E-05    |             |             |             |             | 0.0013506   |             |             | 1.64E-05    |
| k_Bacteria;p__Bacteroidetes;c__Flavobacteriia;o__Flavobacteriales;f__Flavobacteriaceae;g__Robiginitalea          |             |            | 0          | 0          |             |             |             |             |             |             |             |             |             |             |             |
| k_Bacteria;p__Bacteroidetes;c__Flavobacteriia;o__Flavobacteriales;f__Flavobacteriaceae;g__Sediminicola           | 0.01125679  | 0.00735708 | 0.00216524 | 0.00114037 | 0.01746977  | 0.03461024  | 0.04083628  |             |             | 0.05037683  | 0.0434245   | 0.03924459  | 0.00023108  | 0.00051458  | 0.02103022  |
| k_Bacteria;p__Bacteroidetes;c__Flavobacteriia;o__Flavobacteriales;f__Flavobacteriaceae;g__Tenacibaculum          | 0.00202729  | 0.00219774 | 0.00085602 | 0.00130329 | 0.00295228  | 0.00649602  | 0.00646152  |             |             | 0.00983737  | 0.00609013  | 0.01023369  | 0.00231085  | 0.00203775  | 0.00332487  |
| k_Bacteria;p__Bacteroidetes;c__Flavobacteriia;o__Flavobacteriales;f__Flavobacteriaceae;g__Ulivabacter            | 1.33E-05    |            | 0.00018883 |            | 6.42E-05    |             |             |             |             |             |             | 0.00023153  | 0.00063548  |             | 0.00029482  |
| k_Bacteria;p__Bacteroidetes;c__Flavobacteriia;o__Flavobacteriales;f__Flavobacteriaceae;g__Winogradskyella        |             |            | 0          | 0          |             | 0.00021125  | 0.00016092  |             |             |             |             |             |             |             | 0.00137908  |
| k_Bacteria;p__Bacteroidetes;c__Flavobacteriia;o__Flavobacteriales;f__Flavobacteriaceae;g__Winogradskyella        |             |            | 0          | 0          |             |             |             |             |             |             |             |             |             |             | 3.28E-05    |
| k_Bacteria;p__Bacteroidetes;c__Flavobacteriia;o__Flavobacteriales;f__NS9;g__                                     | 0.00013337  | 0.00029482 | 8.81E-05   |            |             |             |             |             | 0.00697807  |             | 0.00047983  | 0.0003473   |             | 0.00090567  | 0.0006879   |
| k_Bacteria;p__Bacteroidetes;c__Flavobacteriia;o__Flavobacteriales;f__[Weeksellaceae];g__                         | 2.67E-05    |            | 6.29E-05   |            |             |             |             | 0.00361384  |             |             |             |             |             |             |             |
| k_Bacteria;p__Bacteroidetes;c__Flavobacteriia;o__Flavobacteriales;f__[Weeksellaceae];g__Chrysoabacterium         |             |            | 0          | 0.00010071 |             |             |             | 0.00980988  |             |             |             |             |             |             | 0.00045283  |
| k_Bacteria;p__Bacteroidetes;c__Flavobacteriia;o__Flavobacteriales;f__[Weeksellaceae];g__Cloacibacterium          | 1.33E-05    | 0.00017421 |            | 0.06853109 | 2.57E-05    | 8.80E-05    | 2.48E-05    |             | 0.0011305   | 0.00012918  |             |             |             |             |             |
| k_Bacteria;p__Bacteroidetes;c__Flavobacteriia;o__Flavobacteriales;f__[Weeksellaceae];g__Weeksella                |             |            | 0          | 0          |             |             |             |             | 0.00655084  |             |             |             |             |             |             |
| k_Bacteria;p__Bacteroidetes;c__Sphingobacteriia;o__Sphingobacteriales;f__g__                                     | 0.00089361  | 0.00044223 | 0.00010071 |            | 0.00056478  | 0.00413703  | 0.00558265  |             |             |             |             |             |             |             | 0.00763246  |
| k_Bacteria;p__Bacteroidetes;c__Sphingobacteriia;o__Sphingobacteriales;f__NS11-12;g__                             | 4.00E-05    |            | 7.55E-05   |            | 0.0001412   |             |             |             |             | 0.00589052  | 0.00175322  | 0.00059426  | 0.0034085   |             | 4.91E-05    |
| k_Bacteria;p__Bacteroidetes;c__Sphingobacteriia;o__Sphingobacteriales;f__Sphingobacteriaceae;g__Pedobacter       |             |            | 0          | 0          |             | 6.42E-05    | 7.04E-05    |             |             |             |             |             |             |             | 4.91E-05    |
| k_Bacteria;p__Bacteroidetes;c__Sphingobacteriia;o__Sphingobacteriales;f__Sphingobacteriaceae;g__Sphingobacterium | 0           | 0.00026802 | 0.00020142 |            | 0.00012836  |             |             |             |             |             |             |             |             |             |             |
| k_Bacteria;p__Bacteroidetes;c__VC2_1_Bac22;o__f__g__                                                             |             |            |            | 0.00124898 |             |             |             |             |             |             |             |             |             |             |             |
| k_Bacteria;p__Bacteroidetes;c__[Rhodothermii];o__[Rhodothermales];f__[Balaenolaceae];g__Balaenola                |             |            | 0          | 7.55E-05   |             |             |             |             |             |             |             |             |             |             |             |
| k_Bacteria;p__Bacteroidetes;c__[Saprospirae];o__[Saprospirales];f__g__                                           | 0.00020006  | 0.00022781 | 0.00031471 |            |             |             |             |             |             |             |             |             |             |             |             |
| k_Bacteria;p__Bacteroidetes;c__[Saprospirae];o__[Saprospirales];f__Chitinophagaceae;g__                          | 0.00016005  |            | 0          | 0          |             | 1.76E-05    |             |             |             | 0.00014764  |             |             |             |             |             |
| k_Bacteria;p__Bacteroidetes;c__[Saprospirae];o__[Saprospirales];f__Chitinophagaceae;g__Chitinophaga              |             |            | 0          | 0          |             |             |             |             |             |             |             |             |             |             |             |
| k_Bacteria;p__Bacteroidetes;c__[Saprospirae];o__[Saprospirales];f__Chitinophagaceae;g__Niabella                  |             |            | 0          | 0          |             |             |             |             |             |             |             |             |             |             |             |
| k_Bacteria;p__Bacteroidetes;c__[Saprospirae];o__[Saprospirales];f__Chitinophagaceae;g__Sediminibacterium         |             |            | 0          | 0.00054304 |             |             |             | 0.00722767  |             |             |             |             |             |             |             |
| k_Bacteria;p__Bacteroidetes;c__[Saprospirae];o__[Saprospirales];f__Saprospiraceae;g__                            |             |            | 0          | 0          |             |             |             |             |             |             |             |             |             |             |             |
| k_Bacteria;p__Bacteroidetes;c__[Saprospirae];o__[Saprospirales];f__Saprospiraceae;g__Lewinella                   | 2.67E-05    | 0.00013401 | 0.00037766 |            | 0.00012836  |             |             |             |             |             | 7.72E-05    | 0.00050068  |             |             | 8.19E-05    |
| k_Bacteria;p__Bacteroidetes;c__[Saprospirae];o__[Saprospirales];f__Saprospiraceae;g__Saprosira                   |             |            | 0.00010071 |            |             |             |             |             |             |             |             |             |             |             |             |
| k_Bacteria;p__Chlamydiae;c__Chlamydiae;o__Chlamydiales;f__g__                                                    |             |            | 0          | 0          |             |             |             |             |             |             |             |             |             |             |             |
| k_Bacteria;p__Chloroflexi;c__Anaerolineae;o__Caldilineales;f__Caldilineaceae;g__                                 |             |            | 0          | 0          |             |             |             | 4.95E-05    |             |             |             |             |             |             |             |
| k_Bacteria;p__Chloroflexi;c__Anaerolineae;o__GCA004;f__g__                                                       |             |            | 0          | 0          |             |             |             |             |             |             |             |             |             |             |             |
| k_Bacteria;p__Chloroflexi;c__Chloroflexi;o__[Roseiflexales];f__g__                                               |             |            | 0          | 0          |             |             |             |             |             |             |             |             |             |             |             |
| k_Bacteria;p__Chloroflexi;c__Ellin6529;o__f__g__                                                                 |             | 0.00021441 |            |            |             | 0.00010563  |             |             |             |             |             |             |             |             |             |
| k_Bacteria;p__Chloroflexi;c__Gitt-GS-136;o__f__g__                                                               |             |            | 0          | 0          |             |             |             | 1.24E-05    |             |             |             |             |             |             |             |
| k_Bacteria;p__Chloroflexi;c__S085;o__f__g__                                                                      |             | 0.00025462 |            |            |             |             |             |             |             |             |             |             |             |             |             |
| k_Bacteria;p__Chloroflexi;c__SAR202;o__f__g__                                                                    |             |            |            |            | 2.57E-05    |             |             |             |             |             |             |             |             |             | 3.28E-05    |
| k_Bacteria;p__Chloroflexi;c__TK10_o_AKYG885;f__Dolo_23;g__                                                       |             |            | 0          | 0          |             |             |             |             |             |             |             |             |             |             |             |
| k_Bacteria;p__Cyanobacteria;c__4C04-2;o__MLE1-12;f__g__                                                          |             |            | 0          | 0          |             |             |             |             |             |             |             |             |             |             |             |
| k_Bacteria;p__Cyanobacteria;c__4C04-2;o__Y52;f__g__                                                              |             |            | 0          | 0          |             |             |             |             |             |             |             |             |             |             | 0.00061575  |
| k_Bacteria;p__Cyanobacteria;c__Chloroplast;o__f__g__                                                             | 0.00018672  |            | 0          | 0          | 0.00020538  |             |             |             |             |             |             |             |             |             |             |
| k_Bacteria;p__Cyanobacteria;c__Chloroplast;o__Cercospora;f__g__                                                  |             |            | 0          | 0          |             |             |             |             |             |             |             |             |             |             |             |
| k_Bacteria;p__Cyanobacteria;c__Chloroplast;o__Chlorophyta;f__g__                                                 | 0.00097363  | 0.00054944 | 0.00035248 |            | 6.42E-05    | 0.00461235  | 0.00334216  |             |             |             |             |             |             |             | 0.00461879  |
| k_Bacteria;p__Cyanobacteria;c__Chloroplast;o__Chlorophyta;f__Mamiellaceae;g__                                    | 0.01048321  | 0.00950122 | 0.00417941 |            | 0.00284959  | 0.01781565  | 0.01387617  | 0.00462831  |             | 7.38E-05    |             |             | 0.00010292  | 0.00530669  |             |
| k_Bacteria;p__Cyanobacteria;c__Chloroplast;o__Chlorophyta;f__Mamiellaceae;g__Micromonas                          |             |            | 0          | 0          |             |             | 1.24E-05    |             |             |             |             |             |             |             | 6.17E-05    |
| k_Bacteria;p__Cyanobacteria;c__Chloroplast;o__Chlorophyta;f__Trebouxiophyceae;g__                                |             |            | 0          | 0          |             |             |             |             |             |             |             |             |             |             |             |
| k_Bacteria;p__Cyanobacteria;c__Chloroplast;o__Cryptophyta;f__g__                                                 | 0.000024122 |            | 0          | 0          | 0.000258785 |             |             |             |             |             |             |             |             |             | 1.64E-05    |
| k_Bacteria;p__Cyanobacteria;c__Chloroplast;o__Haptophyta;f__g__                                                  | 0.00057624  | 0.00035248 |            | 0          | 0.00781635  |             |             |             |             |             |             |             |             |             | 4.91E-05    |
| k_Bacteria;p__Cyanobacteria;c__Chloroplast;o__Rhodophyta;f__g__                                                  |             |            | 0          | 0          |             |             |             |             |             |             |             |             |             |             |             |
| k_Bacteria;p__Cyanobacteria;c__Chloroplast;o__Stramenopiles;f__g__                                               | 0.00016005  |            | 0          | 0          |             | 0.0016196   | 0.00054465  |             |             | 0.00105193  | 0.00046306  | 0.00115542  |             |             | 0.00109737  |
| k_Bacteria;p__Cyanobacteria;c__Chloroplast;o__Streptophyta;f__g__                                                | 0.00157382  | 0.00010721 | 0.00017624 |            | 7.70E-05    | 1.76E-05    | 0.00051626  | 0.02570493  | 0.00616819  | 0.00051674  |             | 0.000674    | 0.00057633  |             | 3.28E-05    |
| k_Bacteria;p__Cyanobacteria;c__Nostocophycidiae;o__Nostocales;f__Nostocaceae;g__                                 |             |            | 0          | 0          |             |             |             |             |             | 0.0118912   |             |             |             |             |             |
| k_Bacteria;p__Cyanobacteria;c__Nostocophycidiae;o__Stigonematales;f__Rivulariaceae;g__Calothrix                  |             | 5.36E-05   |            | 0          |             |             | 9.90E-05    | 0.04801239  | 0.00306181  |             |             |             |             | 0.00041167  | 8.19E-05    |
| k_Bacteria;p__Cyanobacteria;c__Oscillatoriophyycidiae;o__Chroococcales;f__Cyanobacteriaceae;g__                  |             | 0          | 0          | 0          |             |             |             |             |             |             |             |             |             |             |             |
| k_Bacteria;p__Cyanobacteria;c__Oscillatoriophyycidiae;o__Chroococcales;f__Microcystaceae;g__Microcystis          |             |            | 0          | 0          |             |             |             |             |             |             |             |             |             |             | 1.64E-05    |
| k_Bacteria;p__Cyanobacteria;c__Oscillatoriophyycidiae;o__Chroococcales;f__Xenococcaceae;g__                      | 0.00026675  | 0.00030822 | 0.00037766 | 0.00407277 | 7.70E-05    | 0.00019365  | 0.00023519  |             | 0.000833    | 0.00068283  |             | 0.0009436   |             | 0.00013103  |             |
| k_Bacteria;p__Cyanobacteria;c__Synecococccophycidiae;o__Pseudanabaenales;f__Pseudanabaenaceae;g__                |             |            | 0          | 0          |             |             |             |             |             |             |             |             |             |             |             |
| k_Bacteria;p__Cyanobacteria;c__Synecococccophycidiae;o__Pseudanabaenales;f__Pseudanabaenaceae;g__Pseudanabaena   |             |            | 0          | 0          |             | 0.00019365  |             |             |             |             |             |             |             |             |             |
| k_Bacteria;p__Cyanobacteria;c__Synecococccophycidiae;o__Synecococcales;f__Synecococcaceae;g__Prochlorococcus     |             | 0.00029482 | 0.00081826 |            | 1.28E-05    | 0.00019365  |             |             |             | 0.00012918  |             | 0.00042366  |             |             |             |
| k_Bacteria;p__Cyanobacteria;c__Synecococccophycidiae;o__Synecococcales;f__Synecococcaceae;g__Synecococcus        | 0.00058685  | 0.00119592 |            | 0          | 0.00037224  | 0.00327442  | 0.00012378  |             | 0.00526915  | 0.00066901  |             |             |             |             | 0.00039309  |
| k_Bacteria;p__FBP;c__o__f__g__                                                                                   |             |            | 0          | 0          |             |             |             |             |             |             |             |             |             |             |             |
| k_Bacteria;p__Firmicutes;c__Firmicutes;o__Firmicutes;f__g__                                                      |             |            | 0          | 0          |             |             |             |             |             |             |             |             |             |             |             |
| k_Bacteria;p__Firmicutes;c__Bacilli;o__Bacillales;f__g__                                                         |             |            | 0          | 0          |             |             |             |             |             |             |             |             |             |             |             |
| k_Bacteria;p__Firmicutes;c__Bacilli;o__Bacillales;f__Bacillaceae;g__Anoxybacillus                                | 0.00022674  | 0.00010721 | 0.00017624 |            |             |             |             |             |             |             |             |             |             |             |             |
| k_Bacteria;p__Firmicutes;c__Bacilli;o__Bacillales;f__Bacillaceae;g__Bacillus                                     |             |            | 0          | 0.00217214 |             | 7.04E-05    |             | 0.00541156  |             |             |             |             |             |             |             |
| k_Bacteria;p__Firmicutes;c__Bacilli;o__Bacillales;f__Bacillaceae;g__Geobacillus                                  |             |            | 0          | 0.00385555 |             |             |             |             |             |             |             |             |             |             |             |
| k_Bacteria;p__Firmicutes;c__Bacilli;o__Bacillales;f__Bacillaceae;g__Marinococcus                                 |             |            | 0          | 0          |             |             |             |             |             |             |             |             |             |             | 3.28E-05    |
| k_Bacteria;p__Firmicutes;c__Bacilli;o__Bacillales;f__Listeriaceae;g__                                            |             |            | 0          | 0          |             |             |             |             |             |             | 0.00023991  |             |             |             |             |
| k_Bacteria;p__Firmicutes;c__Bacilli;o__Bacillales;f__Listeriaceae;g__Brochothrix                                 |             |            | 0          | 0          |             |             |             |             |             | 1.85E-05    |             |             |             |             |             |



| Taxon                                                                                                      | Copepod genus  | 1231            | 1233            | 1234            | 1235            | 1236            | 1243                | 1244                | 6473                | 6474                | 1188                | 1189                | 1190                | 1226                | 1227                | 2027                |
|------------------------------------------------------------------------------------------------------------|----------------|-----------------|-----------------|-----------------|-----------------|-----------------|---------------------|---------------------|---------------------|---------------------|---------------------|---------------------|---------------------|---------------------|---------------------|---------------------|
|                                                                                                            | Type of sample | Calanus FullGut | Calanus FullGut | Calanus FullGut | Calanus FullGut | Calanus FullGut | Centropages FullGut | Centropages FullGut | Centropages FullGut | Centropages FullGut | Centropages Starved | Centropages Starved | Centropages Starved | Centropages Starved | Centropages Starved | Centropages Starved |
| k_Bacteria;p_Gemmatimonadetes;c_Gemmatimonadetes;o_f;g                                                     |                | 0               | 0               | 0               | 0               | 0               | 0                   | 0                   | 0                   | 0                   | 0                   | 0                   | 0                   | 0                   | 0                   | 0                   |
| k_Bacteria;p_Gemmatimonadetes;c_Gemmatimonadetes;o_Gemmatimonadales;f;g                                    |                | 0               | 0               | 0               | 0.00043443      | 0               | 3.52E-05            | 0                   | 0                   | 0                   | 0                   | 0                   | 7.72E-06            | 0                   | 0                   | 0                   |
| k_Bacteria;p_Lentisphaerae;c_Lentisphaeria;o_Lentisphaerales;f;g                                           |                | 0               | 0               | 0               | 0               | 0               | 0                   | 0                   | 0                   | 0                   | 0                   | 0                   | 0                   | 0                   | 0                   | 0                   |
| k_Bacteria;p_Lentisphaerae;c_Lentisphaeria;o_Lentisphaerales;f_Lentisphaeraeaceae;g                        |                | 0               | 0               | 0               | 0               | 0               | 0                   | 0                   | 0                   | 0                   | 0                   | 0                   | 0                   | 0                   | 0                   | 0                   |
| k_Bacteria;p_Lentisphaerae;c_Lentisphaeria;o_Lentisphaerales;f_Lentisphaeraeaceae;g_Lentisphaera           |                | 0               | 0               | 0               | 0               | 0               | 0                   | 0                   | 0                   | 0                   | 0                   | 0                   | 0                   | 0                   | 0                   | 0                   |
| k_Bacteria;p_Lentisphaerae;c_Lentisphaeria;o_Victivallales;f_Victivallaceae;g                              |                | 0               | 0               | 0               | 0               | 0               | 0                   | 0                   | 0                   | 0                   | 0                   | 0                   | 0                   | 0                   | 0                   | 0                   |
| k_Bacteria;p_NKB19;c_SHAB590;o_f;g                                                                         |                | 0               | 0               | 0               | 0               | 0               | 0                   | 0                   | 0                   | 0                   | 0                   | 0                   | 0                   | 0                   | 0                   | 0                   |
| k_Bacteria;p_Nitrospirae;c_Nitrospira;o_Nitrospirales;f_Nitrospiraceae;g                                   |                | 0               | 0               | 0               | 0               | 0               | 0                   | 0                   | 0                   | 0                   | 0                   | 0                   | 0                   | 0                   | 0                   | 0                   |
| k_Bacteria;p_OD1;c_o;f;g                                                                                   |                | 0               | 0               | 0               | 0               | 0               | 0                   | 0                   | 0                   | 0                   | 0                   | 0                   | 0                   | 0.00032933          | 0                   | 0                   |
| k_Bacteria;p_OD1;c_ABY1;o_f;g                                                                              |                | 0               | 0               | 0               | 0               | 0               | 0                   | 0                   | 0                   | 0                   | 0                   | 0                   | 0                   | 0                   | 0                   | 0                   |
| k_Bacteria;p_OD1;c_SM2F11;o_f;g                                                                            |                | 0.0001067       | 0               | 0               | 0               | 0               | 0                   | 0                   | 0                   | 0                   | 0                   | 0                   | 0                   | 0.00011554          | 0.0001235           | 0                   |
| k_Bacteria;p_OD1;c_ZB2;o_f;g                                                                               |                | 2.67E-05        | 0               | 0               | 5.43E-05        | 0               | 0                   | 3.71E-05            | 0                   | 0                   | 0                   | 0                   | 0                   | 0                   | 0                   | 1.64E-05            |
| k_Bacteria;p_OP8;c_OP8_1;o_HMMVPog-54;f;g                                                                  |                | 0               | 0               | 0               | 0               | 0               | 0                   | 0                   | 0                   | 0                   | 0                   | 0                   | 0                   | 0                   | 0                   | 0                   |
| k_Bacteria;p_Plantomyces;c_OM190;o_CL500-15;f;g                                                            |                | 1.33E-05        | 0               | 0               | 0               | 0               | 0                   | 0                   | 0                   | 0                   | 0                   | 0                   | 0                   | 0                   | 0                   | 0                   |
| k_Bacteria;p_Plantomyces;c_OM190;o_agg27;f;g                                                               |                | 0               | 0               | 0               | 0               | 0.00012323      | 0                   | 0                   | 0                   | 0                   | 0                   | 0                   | 0                   | 0                   | 0                   | 0                   |
| k_Bacteria;p_Plantomyces;c_Phycisphaerae;o_Phycisphaerales;f;g                                             |                | 0.00016005      | 0               | 0               | 0               | 0               | 0                   | 0                   | 0                   | 0                   | 0                   | 0                   | 0                   | 0.00133792          | 1.64E-05            | 0                   |
| k_Bacteria;p_Plantomyces;c_Phycisphaerae;o_Phycisphaerales;f_Phycisphaeraeaceae;g                          |                | 0               | 0               | 0               | 0               | 0               | 0                   | 0                   | 0                   | 0                   | 0                   | 0                   | 0                   | 0                   | 0                   | 0                   |
| k_Bacteria;p_Plantomyces;c_Plantomycetia;o_Gemmatales;f_Gemmataceae;g                                      |                | 0               | 0               | 0               | 0               | 0               | 0                   | 0                   | 0                   | 0                   | 0                   | 0                   | 0                   | 0                   | 0                   | 0                   |
| k_Bacteria;p_Plantomyces;c_Plantomycetia;o_Gemmatales;f_Isosphaeraeaceae;g                                 |                | 0               | 6.70E-05        | 0               | 0               | 0               | 0                   | 0                   | 0                   | 0                   | 0                   | 0                   | 0                   | 0                   | 0                   | 0                   |
| k_Bacteria;p_Plantomyces;c_Plantomycetia;o_Pirellulales;f_Pirellulaceae;g                                  |                | 0.00076023      | 5.36E-05        | 0.00016365      | 0               | 0.00070598      | 0.00190127          | 0.00022281          | 0.07279298          | 0.01011108          | 0                   | 0.00012918          | 0                   | 0.0004044           | 0.0030875           | 0.00024568          |
| k_Bacteria;p_Plantomyces;c_Plantomycetia;o_Pirellulales;f_Pirellulaceae;g_Plantomycete                     |                | 0               | 0               | 0               | 0               | 0               | 0                   | 0                   | 0                   | 0                   | 0                   | 0                   | 0                   | 0                   | 0                   | 0                   |
| k_Bacteria;p_Plantomyces;c_Plantomycetia;o_Pirellulales;f_Pirellulaceae;g_Rhodopirellula                   |                | 0               | 0               | 0               | 0               | 0               | 0                   | 0                   | 0                   | 0                   | 0                   | 0                   | 0                   | 0                   | 0                   | 0                   |
| k_Bacteria;p_Plantomyces;c_Plantomycetia;o_Pirellulales;f_Pirellulaceae;g_Rhodopirellula                   |                | 0               | 0               | 0               | 0               | 0.00011552      | 5.28E-05            | 0                   | 0                   | 0                   | 0                   | 0                   | 0                   | 0                   | 0                   | 0                   |
| k_Bacteria;p_Plantomyces;c_vadinHA49;o_f;g                                                                 |                | 0               | 0               | 0               | 0               | 0               | 0                   | 0                   | 0                   | 0                   | 0                   | 0                   | 0                   | 0                   | 0                   | 0                   |
| k_Bacteria;p_Proteobacteria;c_Alphaproteobacteria;o_f;g                                                    |                | 0.00774904      | 0.00518614      | 0.00305903      | 0               | 0.00419737      | 0.01197099          | 0.01329438          | 0                   | 0.00534036          | 0.00279651          | 0.01005795          | 0.00314111          | 0                   | 0.00142025          | 0.0073704           |
| k_Bacteria;p_Proteobacteria;c_Alphaproteobacteria;o_BD7-3f;g                                               |                | 0.00022674      | 6.70E-05        | 0               | 0               | 0.00130927      | 0.00339765          | 0.00720422          | 0                   | 0                   | 0                   | 0                   | 0                   | 0                   | 0                   | 0.00021292          |
| k_Bacteria;p_Proteobacteria;c_Alphaproteobacteria;o_Caulobacteriales;f_Caulobacteraceae;g                  |                | 6.67E-05        | 0               | 0.00190062      | 0               | 0               | 0                   | 1.24E-05            | 0.02891069          | 0.0192965           | 0                   | 0                   | 0                   | 0                   | 0.00034992          | 8.19E-05            |
| k_Bacteria;p_Proteobacteria;c_Alphaproteobacteria;o_Caulobacteriales;f_Caulobacteraceae;g_Brevundimonas    |                | 0               | 0               | 0               | 0               | 0               | 8.80E-05            | 0                   | 0                   | 0                   | 0                   | 0                   | 0                   | 0                   | 0                   | 0                   |
| k_Bacteria;p_Proteobacteria;c_Alphaproteobacteria;o_Caulobacteriales;f_Caulobacteraceae;g_Mycoplasma       |                | 0               | 0               | 0               | 0               | 0               | 0                   | 0                   | 0                   | 0                   | 0                   | 0                   | 0                   | 0                   | 0                   | 0                   |
| k_Bacteria;p_Proteobacteria;c_Alphaproteobacteria;o_Caulobacteriales;f_Caulobacteraceae;g_Phenylobacterium |                | 0               | 0               | 0               | 0               | 0               | 0                   | 0                   | 0                   | 0                   | 0                   | 0                   | 0                   | 0                   | 0                   | 0                   |
| k_Bacteria;p_Proteobacteria;c_Alphaproteobacteria;o_Ellin329;f;g                                           |                | 0               | 0               | 0               | 0               | 0               | 0                   | 0                   | 0                   | 0                   | 0                   | 0                   | 0                   | 0                   | 0                   | 0                   |
| k_Bacteria;p_Proteobacteria;c_Alphaproteobacteria;o_Kiloniellales;f;g                                      |                | 1.33E-05        | 0               | 0               | 0.00011552      | 0.00033448      | 0                   | 0                   | 0                   | 0                   | 0                   | 0                   | 0                   | 0                   | 0                   | 0                   |
| k_Bacteria;p_Proteobacteria;c_Alphaproteobacteria;o_Kiloniellales;f_Kiloniellaceae;g                       |                | 5.33E-05        | 0.00017421      | 0.00041542      | 0               | 0               | 0                   | 0                   | 0                   | 0                   | 0.00125494          | 0.00037045          | 0                   | 0                   | 0                   | 6.55E-05            |
| k_Bacteria;p_Proteobacteria;c_Alphaproteobacteria;o_Kiloniellales;f_Kiloniellaceae;g_Thalassospira         |                | 0               | 0               | 0               | 0               | 0               | 0                   | 0                   | 0                   | 0                   | 0                   | 0                   | 0                   | 0                   | 0                   | 0                   |
| k_Bacteria;p_Proteobacteria;c_Alphaproteobacteria;o_Kordiimonadales;f_Kordiimonadaceae;g                   |                | 0.00014671      | 0.00022781      | 0.00018883      | 0.00086886      | 0               | 0                   | 0                   | 0.00469952          | 0                   | 0.00012918          | 0                   | 0                   | 0.00055575          | 9.83E-05            | 0                   |
| k_Bacteria;p_Proteobacteria;c_Alphaproteobacteria;o_Rhizobiales;f_Aurantimonadaceae;g_Marteella            |                | 0               | 0               | 0               | 0               | 0               | 0                   | 0                   | 0                   | 0                   | 0                   | 0                   | 0                   | 0                   | 0                   | 0                   |
| k_Bacteria;p_Proteobacteria;c_Alphaproteobacteria;o_Rhizobiales;f_Bejeriackiaceae;g_Chelatococcus          |                | 0               | 0               | 0               | 0.00032582      | 0               | 0                   | 0                   | 0                   | 0                   | 0                   | 0                   | 0                   | 0                   | 0                   | 0                   |
| k_Bacteria;p_Proteobacteria;c_Alphaproteobacteria;o_Rhizobiales;f_Bradyrhizobiaceae;g                      |                | 0.00037345      | 2.68E-05        | 0               | 0               | 7.70E-05        | 0.00019365          | 6.19E-05            | 0.01032525          | 0.01594987          | 0.00220151          | 0                   | 0.0002624           | 0                   | 0                   | 0                   |
| k_Bacteria;p_Proteobacteria;c_Alphaproteobacteria;o_Rhizobiales;f_Bradyrhizobiaceae;g_Balneimonas          |                | 0               | 0               | 0               | 0               | 0               | 0                   | 0                   | 0                   | 0                   | 0                   | 0                   | 0                   | 0                   | 0                   | 0                   |
| k_Bacteria;p_Proteobacteria;c_Alphaproteobacteria;o_Rhizobiales;f_Bradyrhizobiaceae;g_Pseudomonas          |                | 0               | 0               | 0               | 0               | 0               | 0                   | 0                   | 0                   | 0                   | 0                   | 0                   | 0                   | 0                   | 0                   | 0                   |
| k_Bacteria;p_Proteobacteria;c_Alphaproteobacteria;o_Rhizobiales;f_Cohaesibacteraceae;g_Cohaesibacter       |                | 0               | 0               | 0               | 0               | 0               | 0                   | 0                   | 0                   | 0                   | 0                   | 0                   | 0                   | 0                   | 0                   | 0                   |
| k_Bacteria;p_Proteobacteria;c_Alphaproteobacteria;o_Rhizobiales;f_Hyphomicrobiaceae;g                      |                | 0               | 0               | 0               | 0               | 0               | 0                   | 7.43E-05            | 0                   | 0                   | 0                   | 0                   | 0                   | 0                   | 0                   | 0                   |
| k_Bacteria;p_Proteobacteria;c_Alphaproteobacteria;o_Rhizobiales;f_Hyphomicrobiaceae;g_Devesia              |                | 0               | 0               | 0               | 0.00012836      | 0.00570382      | 0.00147303          | 0                   | 0                   | 0                   | 0                   | 0                   | 7.72E-06            | 0                   | 0.00055687          | 0                   |
| k_Bacteria;p_Proteobacteria;c_Alphaproteobacteria;o_Rhizobiales;f_Hyphomicrobiaceae;g_Rhodoplanes          |                | 0               | 0               | 0               | 0               | 0               | 0                   | 0                   | 0                   | 0                   | 0                   | 0                   | 0                   | 0                   | 0                   | 0                   |
| k_Bacteria;p_Proteobacteria;c_Alphaproteobacteria;o_Rhizobiales;f_Methylobacteriaceae;g                    |                | 0               | 0               | 0               | 1.28E-05        | 0               | 0                   | 0                   | 0                   | 0                   | 0                   | 0                   | 0                   | 0                   | 0                   | 0                   |
| k_Bacteria;p_Proteobacteria;c_Alphaproteobacteria;o_Rhizobiales;f_Methylobacteriaceae;g_Methylobacterium   |                | 0               | 0.00026802      | 0               | 0               | 0               | 0                   | 0                   | 0.00341783          | 0.00073384          | 0.00014764          | 3.09E-05            | 0                   | 2.06E-05            | 0                   | 0                   |
| k_Bacteria;p_Proteobacteria;c_Alphaproteobacteria;o_Rhizobiales;f_Methylocystaceae;g                       |                | 0               | 0.00079065      | 0               | 0               | 0               | 0.00029927          | 0                   | 0                   | 0                   | 0                   | 0                   | 0                   | 0                   | 0                   | 0                   |
| k_Bacteria;p_Proteobacteria;c_Alphaproteobacteria;o_Rhizobiales;f_Methylocystaceae;g_Methylorus            |                | 0               | 0               | 0               | 0               | 0               | 0                   | 0                   | 0                   | 0                   | 0                   | 0                   | 0                   | 0                   | 0                   | 0                   |
| k_Bacteria;p_Proteobacteria;c_Alphaproteobacteria;o_Rhizobiales;f_Methylocystaceae;g_Pleomorphonomas       |                | 0               | 0               | 0               | 0.00211784      | 0               | 0                   | 0                   | 0                   | 0                   | 0                   | 0                   | 0                   | 0                   | 0                   | 0                   |
| k_Bacteria;p_Proteobacteria;c_Alphaproteobacteria;o_Rhizobiales;f_Phyllobacteriaceae;g                     |                | 0               | 0.00017421      | 0               | 0               | 0               | 0.00054574          | 0.00030946          | 0                   | 0                   | 0                   | 0                   | 0                   | 0                   | 0                   | 0                   |
| k_Bacteria;p_Proteobacteria;c_Alphaproteobacteria;o_Rhizobiales;f_Phyllobacteriaceae;g_Chelativorans       |                | 0               | 0               | 0               | 0               | 0               | 0                   | 1.76E-05            | 0                   | 0                   | 0                   | 0                   | 0                   | 0                   | 0                   | 0                   |
| k_Bacteria;p_Proteobacteria;c_Alphaproteobacteria;o_Rhizobiales;f_Phyllobacteriaceae;g_Hoeffea             |                | 0               | 0               | 0               | 0               | 0               | 5.13E-05            | 0.00183086          | 8.66E-05            | 0                   | 0                   | 0                   | 0                   | 0                   | 0                   | 0.00019654          |
| k_Bacteria;p_Proteobacteria;c_Alphaproteobacteria;o_Rhizobiales;f_Phyllobacteriaceae;g_Mesorhizobium       |                | 0               | 0               | 0               | 0               | 0               | 0                   | 0                   | 0                   | 0                   | 0                   | 0                   | 0                   | 0                   | 0                   | 0                   |
| k_Bacteria;p_Proteobacteria;c_Alphaproteobacteria;o_Rhizobiales;f_Phyllobacteriaceae;g_Phyllobacterium     |                | 0               | 0               | 0               | 0               | 0               | 0                   | 0                   | 0                   | 0                   | 0                   | 0                   | 0                   | 0                   | 0                   | 0                   |
| k_Bacteria;p_Proteobacteria;c_Alphaproteobacteria;o_Rhizobiales;f_Rhizobiaceae;g                           |                | 0               | 0               | 0               | 0               | 0               | 0                   | 0                   | 0                   | 0                   | 0                   | 0                   | 0                   | 0                   | 0                   | 0                   |
| k_Bacteria;p_Proteobacteria;c_Alphaproteobacteria;o_Rhizobiales;f_Rhizobiaceae;g_Agrobacterium             |                | 0               | 0               | 7.55E-05        | 0               | 0               | 0                   | 0                   | 0.09498718          | 0                   | 0                   | 0                   | 0                   | 0                   | 0                   | 0                   |
| k_Bacteria;p_Proteobacteria;c_Alphaproteobacteria;o_Rhizobiales;f_Rhizobiaceae;g_Rhizobium                 |                | 0               | 0               | 0               | 0               | 0               | 0                   | 0                   | 0                   | 0                   | 0                   | 0                   | 0                   | 0                   | 0                   | 0                   |
| k_Bacteria;p_Proteobacteria;c_Alphaproteobacteria;o_Rhizobiales;f_Rhizobiaceae;g_Shinella                  |                | 0               | 0               | 0               | 0               | 0               | 0                   | 0                   | 0                   | 7.12E-05            | 0                   | 0                   | 0                   | 0                   | 0                   | 0                   |
| k_Bacteria;p_Proteobacteria;c_Alphaproteobacteria;o_Rhizobiales;f_Xanthobacteraceae;g_Xanthobacter         |                | 0               | 0               | 0               | 0               | 0               | 0                   | 0                   | 0                   | 0                   | 0                   | 0                   | 0                   | 0                   | 0                   | 0                   |
| k_Bacteria;p_Proteobacteria;c_Alphaproteobacteria;o_Rhodobacterales;f_Hyphomonadaceae;g                    |                | 8.00E-05        | 0               | 0               | 0               | 0.0001412       | 0.00144356          | 0.0001733           | 0                   | 0                   | 0.00182467          | 0.00064592          | 0                   | 0                   | 0                   | 0.00019654          |
| k_Bacteria;p_Proteobacteria;c_Alphaproteobacteria;o_Rhodobacterales;f_Hyphomonadaceae;g_Mariculis          |                | 0               | 0               | 0               | 0               | 0               | 0                   | 0                   | 0                   | 0                   | 0                   | 0                   | 0                   | 0                   | 0                   | 0                   |
| k_Bacteria;p_Proteobacteria;c_Alphaproteobacteria;o_Rhodobacterales;f_Hyphomonadaceae;g_Robiginintomaculum |                | 0               | 0               | 0               | 0               | 0               | 0                   | 0                   | 0                   | 0                   | 0                   | 0                   | 0                   | 0                   | 0                   | 0                   |
| k_Bacteria;p_Proteobacteria;c_Alphaproteobacteria;o_Rhodobacterales;f_Rhodobacteraceae;g                   |                | 0.01765875      | 0.00786631      | 0.00309679      | 0.0015205       | 0.01417092      | 0.06744243          | 0.02705914          | 0.05420754          | 0.03375107          | 0.12625942          | 0.12645333          | 0.03865804          | 0.00895453          | 0.013832            | 0.0638277           |
| k_Bacteria;p_Proteobacteria;c_Alphaproteobacteria;o_Rhodobacterales;f_Rhodobacteraceae;g_Amaricoccus       |                | 0               | 0               | 0               | 0               | 0               | 0                   | 0                   | 0                   | 0                   | 0                   | 0                   | 0                   | 0                   | 0.00018525          | 0                   |
| k_Bacteria;p_Proteobacteria;c_Alphaproteobacteria;o_Rhodobacterales;f_Rhodobacteraceae;g_Anaerospira       |                | 0               | 0               | 0               | 0               | 0               | 0                   | 0.00033422          | 0                   | 0                   | 0                   | 0                   | 0                   | 0                   | 0                   | 3.28E-05            |
| k_Bacteria;p_Proteobacteria;c_Alphaproteobacteria;o_Rhodobacterales;f_Rhodobacteraceae;g_Celeribacter      |                | 0               | 0               | 0               | 0               | 0               | 0                   | 0                   | 0                   | 0                   | 0                   | 0                   | 0                   | 0                   | 0                   | 0                   |
| k_Bacteria;p_Proteobacteria;c_Alphaproteobacteria;o_Rhodobacterales;f_Rhodobacteraceae;g_Dinoroseobacter   |                | 0               | 0               | 0               | 0               | 1.28E-05        | 0                   | 7.43E-05            | 0                   | 0                   | 0                   | 0                   | 0                   | 0                   | 0.00037671          | 0                   |
| k_Bacteria;p_Proteobacteria;c_Alphaproteobacteria;o_Rhodobacterales;f_Rhodobacteraceae;g_Donghicola        |                | 0               | 0               | 0               | 0               | 0               | 0                   | 0                   | 0                   | 0                   | 0                   | 0                   | 0                   | 0                   | 0                   | 0                   |
| k_Bacteria;p_Proteobacteria;c_Alphaproteobacteria;o_Rhodobacterales;f_Rhodobacteraceae;g_Jannaschia        |                | 0               | 0               | 0               | 0               | 0               | 0                   | 0                   | 0                   | 0                   | 0                   | 0                   | 0                   | 0                   | 0                   | 0                   |
| k_Bacteria;p_Proteobacteria;c_Alphaproteobacteria;o_Rhodobacterales;f_Rhodobacteraceae;g_Loktanelia        |                | 0               | 0               | 0               | 0.00019254      | 0.0003873       | 0.00034659          | 0                   | 0                   | 0.00249901          | 0                   | 0                   | 0                   | 0                   | 0                   | 0.00027844          |
| k_Bacteria;p_Proteobacteria;c_Alphaproteobacteria;o_Rhodobacterales;f_Rhodobacteraceae;g_Maribius          |                | 0               | 0               | 0               | 0               | 0               | 0                   | 0                   | 0                   | 0                   | 0                   | 0                   | 0                   | 0                   | 0                   | 0                   |
| k_Bacteria;p_Proteobacteria;c_Alphaproteobacteria;o_Rhodobacterales;f_Rhodobacteraceae;g_Marivita          |                | 0               | 0               | 0               | 0               | 0               | 0                   | 0                   | 0                   | 0                   | 0                   | 0                   | 0                   | 0                   | 0                   | 0                   |
| k_Bacteria;p_Proteobacteria;c_Alphaproteobacteria;o_Rhodobacterales;f_Rhodobacteraceae;g_Nautelia          |                | 0               | 0               | 0               | 0               | 0               | 0                   | 0                   | 0                   | 0                   | 1.98E-05            | 0                   | 0                   | 0                   | 0                   | 0                   |











53 Table. Genus-level sequence data shown as proportions of all sequences.

| Taxon                                                                                                           | 2028                            | 2029                   | 1184                   | 1196           | 1245           | 1246           | 2019           |
|-----------------------------------------------------------------------------------------------------------------|---------------------------------|------------------------|------------------------|----------------|----------------|----------------|----------------|
|                                                                                                                 | Copepod genus<br>Type of sample | Centropages<br>Starved | Centropages<br>Starved | Water<br>Water | Water<br>Water | Water<br>Water | Water<br>Water |
| k__Archaea;p__Crenarchaeota;c__Thaumarchaeota;o__Cenarchaeales;f__Cenarchaeaceae;g__Nitrosopumilus              |                                 | 0                      | 0                      | 6.77E-05       | 2.95E-05       | 0              | 0              |
| k__Archaea;p__Euryarchaeota;c__Thermoplasmata;o__E2;f__Marine group II;g__                                      |                                 | 0                      | 0                      | 0.00355925     | 0.00098677     | 0.00083692     | 0.00136303     |
| k__Bacteria;p__AC1;c__SHA-114;o__f__g__                                                                         |                                 | 0                      | 0                      | 0              | 0              | 0              | 1.32E-05       |
| k__Bacteria;p__Acidobacteria;c__o__f__g__                                                                       |                                 | 0                      | 0                      | 0              | 0              | 2.99E-05       | 0              |
| k__Bacteria;p__Acidobacteria;c__Acidobacteria-6;o__iii-15;f__g__                                                |                                 | 0                      | 0                      | 0              | 0              | 0              | 0              |
| k__Bacteria;p__Acidobacteria;c__Acidobacteria;o__Acidobacteriales;f__Acidobacteriaceae;g__                      |                                 | 0                      | 0                      | 0              | 0              | 0              | 0              |
| k__Bacteria;p__Acidobacteria;c__Acidobacteria;o__Acidobacteriales;f__Koribacteraceae;g__                        |                                 | 0                      | 0                      | 0              | 0              | 0              | 0              |
| k__Bacteria;p__Acidobacteria;c__Acidobacteria;o__Acidobacteriales;f__Koribacteraceae;g__Candidatus Koribacter   |                                 | 0                      | 0                      | 0              | 0              | 0              | 0              |
| k__Bacteria;p__Acidobacteria;c__OS-K;o__f__g__                                                                  |                                 | 0                      | 0                      | 0              | 0              | 2.99E-05       | 0              |
| k__Bacteria;p__Acidobacteria;c__Solibacteres;o__Solibacterales;f__g__                                           |                                 | 0                      | 0                      | 0              | 0              | 0              | 0              |
| k__Bacteria;p__Acidobacteria;c__Solibacteres;o__Solibacterales;f__PAUC26f;g__                                   |                                 | 0                      | 0                      | 0              | 0              | 0              | 1.32E-05       |
| k__Bacteria;p__Acidobacteria;c__Sva0725;o__Sva0725;f__g__                                                       |                                 | 0                      | 0                      | 0              | 0              | 0              | 2.65E-05       |
| k__Bacteria;p__Acidobacteria;c__[Chloracidobacteria];o__PK29;f__g__                                             |                                 | 0                      | 0                      | 0              | 0              | 0              | 0              |
| k__Bacteria;p__Acidobacteria;c__[Chloracidobacteria];o__RB41;f__g__                                             |                                 | 0                      | 0                      | 0              | 0              | 0              | 0              |
| k__Bacteria;p__Actinobacteria;c__Acidimicrobia;o__Acidimicrobiales;f__g__                                       |                                 | 0                      | 0                      | 0              | 0.0001031      | 0.00023912     | 0.00010587     |
| k__Bacteria;p__Actinobacteria;c__Acidimicrobia;o__Acidimicrobiales;f__C111;g__                                  | 1.39E-05                        | 8.55E-05               | 0.00041953             | 0.00086895     | 0.00071736     | 0.00082046     | 0.00030592     |
| k__Bacteria;p__Actinobacteria;c__Acidimicrobia;o__Acidimicrobiales;f__JdFBGact;g__                              |                                 | 0                      | 0                      | 4.42E-05       | 8.97E-05       | 2.65E-05       | 0              |
| k__Bacteria;p__Actinobacteria;c__Acidimicrobia;o__Acidimicrobiales;f__Microthrixaceae;g__                       |                                 | 0                      | 0                      | 0              | 0              | 0              | 3.06E-05       |
| k__Bacteria;p__Actinobacteria;c__Acidimicrobia;o__Acidimicrobiales;f__OCS155;g__                                | 0.00012546                      | 0.00029909             | 0.00721323             | 0.00656868     | 0.00095648     | 0.0011116      | 0.00657734     |
| k__Bacteria;p__Actinobacteria;c__Acidimicrobia;o__Acidimicrobiales;f__SC3-41;g__                                | 0.0028855                       | 0.00447217             | 0.00219239             | 0.00334325     | 0.00274988     | 0.00181296     | 0.00128488     |
| k__Bacteria;p__Actinobacteria;c__Acidimicrobia;o__Acidimicrobiales;f__TK06;g__                                  |                                 | 0                      | 0                      | 2.71E-05       | 0              | 0              | 0              |
| k__Bacteria;p__Actinobacteria;c__Acidimicrobia;o__Acidimicrobiales;f__ZA3409c;g__                               |                                 | 0                      | 0                      | 0              | 0              | 0              | 0              |
| k__Bacteria;p__Actinobacteria;c__Acidimicrobia;o__Acidimicrobiales;f__koll13;g__                                |                                 | 0                      | 0                      | 0              | 2.95E-05       | 0              | 5.29E-05       |
| k__Bacteria;p__Actinobacteria;c__Acidimicrobia;o__Acidimicrobiales;f__ntu14;g__                                 |                                 | 0                      | 0                      | 0              | 0              | 2.99E-05       | 0              |
| k__Bacteria;p__Actinobacteria;c__Acidimicrobia;o__Acidimicrobiales;f__wb1_P06;g__                               | 0.00011152                      | 0.00021364             | 8.12E-05               | 1.47E-05       | 0              | 5.29E-05       | 0              |
| k__Bacteria;p__Actinobacteria;c__Actinobacteria;o__Actinomycetales;f__g__                                       | 1.39E-05                        | 0                      | 0.00127213             | 0.00301923     | 0.00218197     | 0.00201146     | 0.00088718     |
| k__Bacteria;p__Actinobacteria;c__Actinobacteria;o__Actinomycetales;f__ACK-M1;g__                                |                                 | 0                      | 0                      | 0              | 0              | 0              | 1.32E-05       |
| k__Bacteria;p__Actinobacteria;c__Actinobacteria;o__Actinomycetales;f__Actinomycetaceae;g__                      |                                 | 0                      | 0                      | 0              | 0              | 0              | 0              |
| k__Bacteria;p__Actinobacteria;c__Actinobacteria;o__Actinomycetales;f__Actinomycetaceae;g__Actinomyces           |                                 | 0                      | 0                      | 0              | 0              | 0              | 0              |
| k__Bacteria;p__Actinobacteria;c__Actinobacteria;o__Actinomycetales;f__Actinomycetaceae;g__Mobiluncus            |                                 | 0                      | 0                      | 0              | 0              | 0              | 0              |
| k__Bacteria;p__Actinobacteria;c__Actinobacteria;o__Actinomycetales;f__Actinomycetaceae;g__N09                   |                                 | 0                      | 0                      | 0              | 0              | 0              | 0              |
| k__Bacteria;p__Actinobacteria;c__Actinobacteria;o__Actinomycetales;f__Actinomycetaceae;g__Varibaculum           |                                 | 0                      | 0                      | 0              | 0              | 0              | 0              |
| k__Bacteria;p__Actinobacteria;c__Actinobacteria;o__Actinomycetales;f__Brevibacteriaceae;g__Brevibacterium       |                                 | 0                      | 0                      | 0              | 0              | 0              | 0              |
| k__Bacteria;p__Actinobacteria;c__Actinobacteria;o__Actinomycetales;f__Cellulomonadaceae;g__Actinotalea          |                                 | 0                      | 0                      | 0              | 0              | 0              | 1.32E-05       |
| k__Bacteria;p__Actinobacteria;c__Actinobacteria;o__Actinomycetales;f__Cellulomonadaceae;g__Cellulomonas         |                                 | 0                      | 0                      | 0              | 0              | 0              | 0              |
| k__Bacteria;p__Actinobacteria;c__Actinobacteria;o__Actinomycetales;f__Cellulomonadaceae;g__Demequina            |                                 | 0                      | 0                      | 0              | 0              | 0              | 0              |
| k__Bacteria;p__Actinobacteria;c__Actinobacteria;o__Actinomycetales;f__Corynebacteriaceae;g__Corynebacterium     |                                 | 0                      | 2.85E-05               | 0              | 0              | 0              | 0              |
| k__Bacteria;p__Actinobacteria;c__Actinobacteria;o__Actinomycetales;f__Dermabacteraceae;g__Brachybacterium       |                                 | 0                      | 0                      | 0              | 0              | 0              | 0              |
| k__Bacteria;p__Actinobacteria;c__Actinobacteria;o__Actinomycetales;f__Dermacoccaceae;g__Dermacoccus             |                                 | 0                      | 0                      | 0              | 0              | 0              | 0              |
| k__Bacteria;p__Actinobacteria;c__Actinobacteria;o__Actinomycetales;f__Dietziaceae;g__Dietzia                    |                                 | 0                      | 0                      | 0              | 0              | 0              | 0              |
| k__Bacteria;p__Actinobacteria;c__Actinobacteria;o__Actinomycetales;f__Frankiaceae;g__                           |                                 | 0                      | 0                      | 0              | 0              | 0              | 0              |
| k__Bacteria;p__Actinobacteria;c__Actinobacteria;o__Actinomycetales;f__Geodermatophilaceae;g__                   |                                 | 0                      | 0                      | 0              | 0              | 2.99E-05       | 0              |
| k__Bacteria;p__Actinobacteria;c__Actinobacteria;o__Actinomycetales;f__Geodermatophilaceae;g__Blastococcus       | 4.18E-05                        | 0                      | 0                      | 0              | 0              | 0              | 0              |
| k__Bacteria;p__Actinobacteria;c__Actinobacteria;o__Actinomycetales;f__Gordoniaceae;g__Gordonia                  |                                 | 0                      | 0                      | 0              | 0              | 0              | 0              |
| k__Bacteria;p__Actinobacteria;c__Actinobacteria;o__Actinomycetales;f__Intrasporangiaceae;g__                    |                                 | 0                      | 0                      | 0              | 0              | 0              | 0              |
| k__Bacteria;p__Actinobacteria;c__Actinobacteria;o__Actinomycetales;f__Intrasporangiaceae;g__Knoellia            |                                 | 0                      | 0                      | 0              | 0              | 0              | 0              |
| k__Bacteria;p__Actinobacteria;c__Actinobacteria;o__Actinomycetales;f__Intrasporangiaceae;g__Oryzihumus          |                                 | 0                      | 0                      | 0              | 0              | 0              | 0              |
| k__Bacteria;p__Actinobacteria;c__Actinobacteria;o__Actinomycetales;f__Intrasporangiaceae;g__Phycococcus         |                                 | 0                      | 0                      | 0              | 0              | 0              | 0              |
| k__Bacteria;p__Actinobacteria;c__Actinobacteria;o__Actinomycetales;f__Intrasporangiaceae;g__Tetrasphaera        |                                 | 0                      | 0                      | 0              | 0              | 0              | 0              |
| k__Bacteria;p__Actinobacteria;c__Actinobacteria;o__Actinomycetales;f__Kineosporiaceae;g__                       |                                 | 0                      | 0                      | 0              | 0              | 2.99E-05       | 0              |
| k__Bacteria;p__Actinobacteria;c__Actinobacteria;o__Actinomycetales;f__Microbacteriaceae;g__                     | 0.00015334                      | 0.00025637             | 0.00192172             | 0.00858641     | 0.03195242     | 0.02174229     | 0.01447014     |
| k__Bacteria;p__Actinobacteria;c__Actinobacteria;o__Actinomycetales;f__Microbacteriaceae;g__Agrococcus           |                                 | 0                      | 0                      | 0              | 0              | 0              | 0              |
| k__Bacteria;p__Actinobacteria;c__Actinobacteria;o__Actinomycetales;f__Microbacteriaceae;g__Candidatus Aquiluna  | 0.00029273                      | 0.00049849             | 0.00274725             | 0.01005921     | 0.01835246     | 0.01175116     | 0.00951419     |
| k__Bacteria;p__Actinobacteria;c__Actinobacteria;o__Actinomycetales;f__Microbacteriaceae;g__Candidatus Rhodoluna |                                 | 0                      | 0                      | 0              | 0              | 2.99E-05       | 0              |
| k__Bacteria;p__Actinobacteria;c__Actinobacteria;o__Actinomycetales;f__Microbacteriaceae;g__Cryocola             |                                 | 0                      | 0                      | 0              | 0              | 0              | 0              |
| k__Bacteria;p__Actinobacteria;c__Actinobacteria;o__Actinomycetales;f__Microbacteriaceae;g__Curtobacterium       |                                 | 0                      | 0                      | 0              | 0              | 0              | 0              |
| k__Bacteria;p__Actinobacteria;c__Actinobacteria;o__Actinomycetales;f__Microbacteriaceae;g__Frigoribacterium     |                                 | 0                      | 0                      | 0              | 0              | 0              | 0              |
| k__Bacteria;p__Actinobacteria;c__Actinobacteria;o__Actinomycetales;f__Microbacteriaceae;g__Herbiconiux          |                                 | 0                      | 0                      | 0              | 0              | 0              | 0              |
| k__Bacteria;p__Actinobacteria;c__Actinobacteria;o__Actinomycetales;f__Microbacteriaceae;g__Microbacterium       |                                 | 0                      | 0                      | 0              | 0              | 0              | 0              |
| k__Bacteria;p__Actinobacteria;c__Actinobacteria;o__Actinomycetales;f__Microbacteriaceae;g__Mycetocola           |                                 | 0                      | 0                      | 0              | 0              | 0              | 0              |
| k__Bacteria;p__Actinobacteria;c__Actinobacteria;o__Actinomycetales;f__Microbacteriaceae;g__Pseudoclavibacter    |                                 | 0                      | 0                      | 0              | 0              | 0              | 0              |
| k__Bacteria;p__Actinobacteria;c__Actinobacteria;o__Actinomycetales;f__Microbacteriaceae;g__Salinibacterium      |                                 | 0                      | 0                      | 0              | 0              | 0              | 0              |
| k__Bacteria;p__Actinobacteria;c__Actinobacteria;o__Actinomycetales;f__Microbacteriaceae;g__Yonghaparkia         | 1.39E-05                        | 0                      | 0                      | 0              | 0              | 0              | 0              |
| k__Bacteria;p__Actinobacteria;c__Actinobacteria;o__Actinomycetales;f__Micrococcaceae;g__                        |                                 | 0                      | 0                      | 0              | 0              | 0              | 0              |
| k__Bacteria;p__Actinobacteria;c__Actinobacteria;o__Actinomycetales;f__Micrococcaceae;g__Arthrobacter            |                                 | 0                      | 0                      | 1.35E-05       | 0              | 0              | 0              |
| k__Bacteria;p__Actinobacteria;c__Actinobacteria;o__Actinomycetales;f__Micrococcaceae;g__Kocuria                 |                                 | 0                      | 1.42E-05               | 0              | 0              | 0              | 0              |
| k__Bacteria;p__Actinobacteria;c__Actinobacteria;o__Actinomycetales;f__Micrococcaceae;g__Microbispora            |                                 | 0                      | 0                      | 0              | 0              | 0              | 0              |
| k__Bacteria;p__Actinobacteria;c__Actinobacteria;o__Actinomycetales;f__Micrococcaceae;g__Micrococcus             |                                 | 0                      | 0                      | 0              | 0              | 0              | 0              |
| k__Bacteria;p__Actinobacteria;c__Actinobacteria;o__Actinomycetales;f__Micrococcaceae;g__Renibacterium           |                                 | 0                      | 0                      | 0              | 0              | 0              | 0              |
| k__Bacteria;p__Actinobacteria;c__Actinobacteria;o__Actinomycetales;f__Micrococcaceae;g__Rothia                  |                                 | 0                      | 2.85E-05               | 0              | 0              | 2.99E-05       | 1.32E-05       |
| k__Bacteria;p__Actinobacteria;c__Actinobacteria;o__Actinomycetales;f__Micromonosporaceae;g__                    |                                 | 0                      | 0                      | 0              | 0              | 0              | 0              |
| k__Bacteria;p__Actinobacteria;c__Actinobacteria;o__Actinomycetales;f__Micromonosporaceae;g__Phytohabitans       |                                 | 0                      | 0                      | 0              | 0              | 0              | 0              |
| k__Bacteria;p__Actinobacteria;c__Actinobacteria;o__Actinomycetales;f__Micromonosporaceae;g__Verrucosipora       |                                 | 0                      | 0                      | 0              | 0              | 0              | 0              |

| Taxon                                                                                                        | 2028          |             | 2029        |            | 1184       | 1196       | 1245       | 1246  | 2019 |
|--------------------------------------------------------------------------------------------------------------|---------------|-------------|-------------|------------|------------|------------|------------|-------|------|
|                                                                                                              | Copepod genus | Centropages | Centropages | Water      | Water      | Water      | Water      | Water |      |
| Type of sample                                                                                               | Starved       | Starved     | Water       | Water      | Water      | Water      | Water      | Water |      |
| k_Bacteria;p_Actinobacteria;c_Actinobacteria;o_Actinomycetales;f_Mycobacteriaceae;g_Mycobacterium            | 0             | 0           | 0           | 0          | 0          | 0          | 0          | 0     |      |
| k_Bacteria;p_Actinobacteria;c_Actinobacteria;o_Actinomycetales;f_Nakamurellaceae;g_                          | 0             | 0           | 0           | 0          | 0          | 0          | 1.32E-05   | 0     |      |
| k_Bacteria;p_Actinobacteria;c_Actinobacteria;o_Actinomycetales;f_Nocardiaceae;g_                             | 0             | 0           | 0           | 0          | 0          | 0          | 0          | 0     |      |
| k_Bacteria;p_Actinobacteria;c_Actinobacteria;o_Actinomycetales;f_Nocardiaceae;g_Rhodococcus                  | 0             | 0           | 0           | 0          | 0          | 0          | 0          | 0     |      |
| k_Bacteria;p_Actinobacteria;c_Actinobacteria;o_Actinomycetales;f_Nocardioideaceae;g_                         | 0             | 0           | 0           | 0          | 0          | 0          | 0          | 0     |      |
| k_Bacteria;p_Actinobacteria;c_Actinobacteria;o_Actinomycetales;f_Nocardioideaceae;g_Aeromicrobium            | 0             | 0           | 0           | 0          | 0          | 0          | 0          | 0     |      |
| k_Bacteria;p_Actinobacteria;c_Actinobacteria;o_Actinomycetales;f_Nocardioideaceae;g_Friedmanniella           | 0             | 0           | 0           | 0          | 0          | 0          | 0          | 0     |      |
| k_Bacteria;p_Actinobacteria;c_Actinobacteria;o_Actinomycetales;f_Nocardioideaceae;g_Nocardioides             | 0             | 0           | 0           | 0          | 0          | 0          | 0          | 0     |      |
| k_Bacteria;p_Actinobacteria;c_Actinobacteria;o_Actinomycetales;f_Nocardioideaceae;g_Propionicimonas          | 0             | 0           | 0           | 0          | 0          | 0          | 0          | 0     |      |
| k_Bacteria;p_Actinobacteria;c_Actinobacteria;o_Actinomycetales;f_Promicromonosporaceae;g_Promicromonospora   | 0             | 0           | 0           | 0          | 0          | 0          | 0          | 0     |      |
| k_Bacteria;p_Actinobacteria;c_Actinobacteria;o_Actinomycetales;f_Propionibacteriaceae;g_                     | 0             | 0           | 0           | 0          | 0          | 0          | 0          | 0     |      |
| k_Bacteria;p_Actinobacteria;c_Actinobacteria;o_Actinomycetales;f_Propionibacteriaceae;g_Propionibacterium    | 5.58E-05      | 1.42E-05    | 0           | 1.47E-05   | 0          | 0          | 1.32E-05   | 0     |      |
| k_Bacteria;p_Actinobacteria;c_Actinobacteria;o_Actinomycetales;f_Pseudonocardiaceae;g_Pseudonocardia         | 0             | 0           | 0           | 0          | 0          | 0          | 0          | 0     |      |
| k_Bacteria;p_Actinobacteria;c_Actinobacteria;o_Actinomycetales;f_Pseudonocardiaceae;g_Saccharopolyspora      | 0             | 0           | 0           | 0          | 0          | 0          | 0          | 0     |      |
| k_Bacteria;p_Actinobacteria;c_Actinobacteria;o_Actinomycetales;f_Sanguibacteriaceae;g_Sanguibacter           | 0             | 0           | 0           | 0          | 0          | 0          | 0          | 0     |      |
| k_Bacteria;p_Actinobacteria;c_Actinobacteria;o_Actinomycetales;f_Sporichthyaceae;g_                          | 0             | 0           | 0           | 0          | 0          | 0          | 0          | 0     |      |
| k_Bacteria;p_Actinobacteria;c_Actinobacteria;o_Actinomycetales;f_Streptomycetaceae;g_                        | 0             | 0           | 0           | 0          | 0          | 0          | 0          | 0     |      |
| k_Bacteria;p_Actinobacteria;c_Actinobacteria;o_Actinomycetales;f_Williamsiaceae;g_Williamsia                 | 0             | 0           | 0           | 0          | 0          | 0          | 0          | 0     |      |
| k_Bacteria;p_Actinobacteria;c_Actinobacteria;o_Actinomycetales;f_Yaniellaceae;g_Auritibacter                 | 0             | 0           | 0           | 0          | 0          | 0          | 0          | 0     |      |
| k_Bacteria;p_Actinobacteria;c_Actinobacteria;o_Bifidobacteriales;f_Bifidobacteriaceae;g_                     | 0             | 0           | 0           | 0          | 0          | 0          | 0          | 0     |      |
| k_Bacteria;p_Actinobacteria;c_Actinobacteria;o_Bifidobacteriales;f_Bifidobacteriaceae;g_Alloscardovia        | 0             | 0           | 0           | 0          | 0          | 0          | 0          | 0     |      |
| k_Bacteria;p_Actinobacteria;c_Actinobacteria;o_Bifidobacteriales;f_Bifidobacteriaceae;g_Bifidobacterium      | 0             | 0           | 0           | 0          | 0          | 0          | 0          | 0     |      |
| k_Bacteria;p_Actinobacteria;c_Actinobacteria;o_Bifidobacteriales;f_Bifidobacteriaceae;g_Gardnerella          | 0             | 0           | 0           | 0          | 0          | 0          | 0          | 0     |      |
| k_Bacteria;p_Actinobacteria;c_Actinobacteria;o_Bifidobacteriales;f_Bifidobacteriaceae;g_Scardovia            | 0             | 0           | 0           | 0          | 0          | 0          | 0          | 0     |      |
| k_Bacteria;p_Actinobacteria;c_Actinobacteria;o_WCHB1-81;f_A425_EuBF1;g_                                      | 0             | 0           | 0           | 0          | 2.99E-05   | 0          | 0          | 0     |      |
| k_Bacteria;p_Actinobacteria;c_Coriobacterii;o_Coriobacteriales;f_Coriobacteriaceae;g_Atopobium               | 0             | 0           | 0           | 0          | 0          | 0          | 0          | 0     |      |
| k_Bacteria;p_Actinobacteria;c_Rubrobacteria;o_Rubrobacteriales;f_Rubrobacteraceae;g_Rubrobacter              | 0             | 0           | 0           | 0          | 0          | 0          | 0          | 0     |      |
| k_Bacteria;p_Actinobacteria;c_Thermoleophila;o_Gaiellales;f_Gaiellaceae;g_                                   | 0             | 0           | 0           | 0          | 0          | 0          | 0          | 0     |      |
| k_Bacteria;p_Actinobacteria;c_Thermoleophila;o_Solirubrobacteriales;f_Conexibacteraceae;g_                   | 0             | 0           | 0           | 0          | 0          | 0          | 0          | 0     |      |
| k_Bacteria;p_Actinobacteria;c_Thermoleophila;o_Solirubrobacteriales;f_Patulibacteraceae;g_                   | 0             | 0           | 0           | 0          | 0          | 0          | 0          | 0     |      |
| k_Bacteria;p_Actinobacteria;c_Thermoleophila;o_Solirubrobacteriales;f_Solirubrobacteraceae;g_                | 0             | 0           | 0           | 0          | 0          | 0          | 0          | 0     |      |
| k_Bacteria;p_Actinobacteria;c_Thermoleophila;o_Solirubrobacteriales;f_Solirubrobacteraceae;g_Solirubrobacter | 0             | 0           | 0           | 0          | 0          | 0          | 0          | 0     |      |
| k_Bacteria;p_Bacteroidetes;c_Bacteroidia;o_Bacteroidales;f_g_                                                | 0             | 0           | 0           | 4.42E-05   | 0.00026901 | 0.0001588  | 6.12E-05   | 0     |      |
| k_Bacteria;p_Bacteroidetes;c_Bacteroidia;o_Bacteroidales;f_Bacteroidaceae;g_Bacteroides                      | 0             | 0           | 2.71E-05    | 0          | 0.00020923 | 0.0001985  | 0          | 0     |      |
| k_Bacteria;p_Bacteroidetes;c_Bacteroidia;o_Bacteroidales;f_Porphyrionadaceae;g_                              | 0             | 0           | 0           | 0          | 8.97E-05   | 5.29E-05   | 0          | 0     |      |
| k_Bacteria;p_Bacteroidetes;c_Bacteroidia;o_Bacteroidales;f_Porphyrionadaceae;g_Paludibacter                  | 0             | 0           | 0           | 0          | 0          | 0          | 0          | 0     |      |
| k_Bacteria;p_Bacteroidetes;c_Bacteroidia;o_Bacteroidales;f_Porphyrionadaceae;g_Parabacteroides               | 0             | 0           | 0           | 0          | 2.99E-05   | 2.65E-05   | 0          | 0     |      |
| k_Bacteria;p_Bacteroidetes;c_Bacteroidia;o_Bacteroidales;f_Porphyrionadaceae;g_Porphyrionas                  | 4.18E-05      | 0           | 0           | 0          | 0          | 0          | 0          | 0     |      |
| k_Bacteria;p_Bacteroidetes;c_Bacteroidia;o_Bacteroidales;f_Prevotellaceae;g_Prevotella                       | 0             | 0           | 0           | 0          | 0.00014945 | 5.29E-05   | 3.06E-05   | 0     |      |
| k_Bacteria;p_Bacteroidetes;c_Bacteroidia;o_Bacteroidales;f_Rikenellaceae;g_                                  | 0             | 0           | 0           | 0          | 0          | 2.65E-05   | 0          | 0     |      |
| k_Bacteria;p_Bacteroidetes;c_Bacteroidia;o_Bacteroidales;f_SB-1;g_                                           | 0             | 0           | 0           | 0          | 0          | 2.65E-05   | 0          | 0     |      |
| k_Bacteria;p_Bacteroidetes;c_Bacteroidia;o_Bacteroidales;f_[Odoribacteraceae];g_Butyricimonas                | 0             | 0           | 0           | 0          | 2.99E-05   | 0          | 0          | 0     |      |
| k_Bacteria;p_Bacteroidetes;c_Bacteroidia;o_Bacteroidales;f_[Odoribacteraceae];g_Odoribacter                  | 0             | 0           | 0           | 0          | 2.99E-05   | 3.97E-05   | 0          | 0     |      |
| k_Bacteria;p_Bacteroidetes;c_Bacteroidia;o_Bacteroidales;f_[Paraprevotellaceae];g_[Prevotella]               | 0             | 0           | 0           | 0          | 0          | 0          | 0          | 0     |      |
| k_Bacteria;p_Bacteroidetes;c_Cytophagia;o_Cytophagales;f_Cyclobacteriaceae;g_                                | 0             | 0           | 0           | 0          | 5.98E-05   | 0          | 0          | 0     |      |
| k_Bacteria;p_Bacteroidetes;c_Cytophagia;o_Cytophagales;f_Cytophagaceae;g_                                    | 0             | 0           | 0           | 0          | 0          | 0          | 0          | 0     |      |
| k_Bacteria;p_Bacteroidetes;c_Cytophagia;o_Cytophagales;f_Cytophagaceae;g_Adhaeribacter                       | 0             | 0           | 0           | 0          | 0          | 0          | 0          | 0     |      |
| k_Bacteria;p_Bacteroidetes;c_Cytophagia;o_Cytophagales;f_Cytophagaceae;g_Cytophaga                           | 0             | 0           | 0           | 0          | 0          | 0          | 0          | 0     |      |
| k_Bacteria;p_Bacteroidetes;c_Cytophagia;o_Cytophagales;f_Cytophagaceae;g_Hymenobacter                        | 0             | 0           | 0           | 0          | 2.99E-05   | 2.65E-05   | 0          | 0     |      |
| k_Bacteria;p_Bacteroidetes;c_Cytophagia;o_Cytophagales;f_Cytophagaceae;g_Leadbetterella                      | 0             | 0           | 0           | 0          | 0          | 0          | 0          | 0     |      |
| k_Bacteria;p_Bacteroidetes;c_Cytophagia;o_Cytophagales;f_Cytophagaceae;g_Spirosoma                           | 0             | 0           | 0           | 0          | 0          | 0          | 0          | 0     |      |
| k_Bacteria;p_Bacteroidetes;c_Cytophagia;o_Cytophagales;f_Flammeovirgaceae;g_                                 | 0.00012546    | 0.00061243  | 0.00140746  | 0.00293087 | 0.00065758 | 0.00064843 | 0.00064244 | 0     |      |
| k_Bacteria;p_Bacteroidetes;c_Cytophagia;o_Cytophagales;f_Flammeovirgaceae;g_TB248                            | 0             | 1.42E-05    | 0           | 0.00013255 | 0          | 0          | 9.18E-05   | 0     |      |
| k_Bacteria;p_Bacteroidetes;c_Cytophagia;o_Cytophagales;f_Flammeovirgaceae;g_Roseivirga                       | 0             | 0           | 4.06E-05    | 0          | 0          | 0          | 0          | 0     |      |
| k_Bacteria;p_Bacteroidetes;c_Cytophagia;o_Cytophagales;f_[Amoebophilaceae];g_SC3-56                          | 0             | 0           | 0           | 0          | 2.99E-05   | 0          | 0          | 0     |      |
| k_Bacteria;p_Bacteroidetes;c_Flavobacterii;o_Flavobacteriales;f_g_                                           | 0.00146366    | 0.00300518  | 0.00382991  | 0.00544935 | 0.01156743 | 0.01290246 | 0.0043441  | 0     |      |
| k_Bacteria;p_Bacteroidetes;c_Flavobacterii;o_Flavobacteriales;f_Cryomorphaeae;g_                             | 0.00078062    | 0.00136729  | 0.02076003  | 0.00843913 | 0.04770445 | 0.03733111 | 0.01275698 | 0     |      |
| k_Bacteria;p_Bacteroidetes;c_Flavobacterii;o_Flavobacteriales;f_Cryomorphaeae;g_Crocinitomix                 | 4.18E-05      | 0.00012818  | 2.71E-05    | 8.84E-05   | 5.98E-05   | 5.29E-05   | 0.00018355 | 0     |      |
| k_Bacteria;p_Bacteroidetes;c_Flavobacterii;o_Flavobacteriales;f_Cryomorphaeae;g_Fluvicicola                  | 0.00223034    | 0.00361762  | 0.00397878  | 0.00300451 | 0.00257054 | 0.00304366 | 0.00244738 | 0     |      |
| k_Bacteria;p_Bacteroidetes;c_Flavobacterii;o_Flavobacteriales;f_Flavobacteriaceae;g_                         | 0.02208035    | 0.03996468  | 0.12399177  | 0.1216678  | 0.08721903 | 0.09456509 | 0.12160426 | 0     |      |
| k_Bacteria;p_Bacteroidetes;c_Flavobacterii;o_Flavobacteriales;f_Algiibacter                                  | 0             | 0           | 2.71E-05    | 0.00011782 | 8.97E-05   | 1.32E-05   | 0          | 0     |      |
| k_Bacteria;p_Bacteroidetes;c_Flavobacterii;o_Flavobacteriales;f_Flavobacteriaceae;g_Aquimarina               | 0             | 0           | 0           | 1.47E-05   | 2.99E-05   | 2.65E-05   | 6.12E-05   | 0     |      |
| k_Bacteria;p_Bacteroidetes;c_Flavobacterii;o_Flavobacteriales;f_Flavobacteriaceae;g_Bizionia                 | 0             | 0           | 6.77E-05    | 4.42E-05   | 0          | 5.29E-05   | 3.06E-05   | 0     |      |
| k_Bacteria;p_Bacteroidetes;c_Flavobacterii;o_Flavobacteriales;f_Flavobacteriaceae;g_Capnocytophaga           | 0             | 0           | 0           | 0          | 0          | 0          | 0          | 0     |      |
| k_Bacteria;p_Bacteroidetes;c_Flavobacterii;o_Flavobacteriales;f_Flavobacteriaceae;g_Cellulophaga             | 1.39E-05      | 0.00011394  | 0           | 1.47E-05   | 0          | 1.32E-05   | 0          | 0     |      |
| k_Bacteria;p_Bacteroidetes;c_Flavobacterii;o_Flavobacteriales;f_Flavobacteriaceae;g_Coccinimonas             | 0.00816861    | 0.01672079  | 0.0190413   | 0.02866064 | 0.02289574 | 0.02523588 | 0.01918135 | 0     |      |
| k_Bacteria;p_Bacteroidetes;c_Flavobacterii;o_Flavobacteriales;f_Flavobacteriaceae;g_Formosa                  | 0             | 2.85E-05    | 0.00027067  | 0.00085422 | 0.00056791 | 0.00038377 | 0.00018355 | 0     |      |
| k_Bacteria;p_Bacteroidetes;c_Flavobacterii;o_Flavobacteriales;f_Flavobacteriaceae;g_Gaetbulibacter           | 0             | 0           | 1.35E-05    | 2.95E-05   | 2.99E-05   | 5.29E-05   | 0.00012237 | 0     |      |
| k_Bacteria;p_Bacteroidetes;c_Flavobacterii;o_Flavobacteriales;f_Flavobacteriaceae;g_Gillisia                 | 1.39E-05      | 2.85E-05    | 0           | 0          | 0          | 0          | 0          | 0     |      |
| k_Bacteria;p_Bacteroidetes;c_Flavobacterii;o_Flavobacteriales;f_Flavobacteriaceae;g_Gilvibacter              | 0             | 0           | 0           | 2.95E-05   | 2.99E-05   | 0          | 3.06E-05   | 0     |      |
| k_Bacteria;p_Bacteroidetes;c_Flavobacterii;o_Flavobacteriales;f_Flavobacteriaceae;g_Gramella                 | 4.18E-05      | 7.12E-05    | 0           | 0          | 0          | 0          | 0          | 0     |      |
| k_Bacteria;p_Bacteroidetes;c_Flavobacterii;o_Flavobacteriales;f_Flavobacteriaceae;g_Kordia                   | 0             | 0           | 0           | 0          | 0          | 1.32E-05   | 0          | 0     |      |
| k_Bacteria;p_Bacteroidetes;c_Flavobacterii;o_Flavobacteriales;f_Flavobacteriaceae;g_Krokinobacter            | 6.97E-05      | 0.00011394  | 0           | 0          | 0          | 1.32E-05   | 3.06E-05   | 0     |      |

Taxon

| Taxon                                                                                                            | 2028          |            | 2029        |            | 1184       |            | 1196       |       | 1245  |       | 1246  |       | 2019  |       |
|------------------------------------------------------------------------------------------------------------------|---------------|------------|-------------|------------|------------|------------|------------|-------|-------|-------|-------|-------|-------|-------|
|                                                                                                                  | Copepod genus |            | Centropages |            | Water      |            | Water      |       | Water |       | Water |       | Water |       |
| Type of sample                                                                                                   | Starved       | Starved    | Water       | Water      | Water      | Water      | Water      | Water | Water | Water | Water | Water | Water | Water |
| k_Bacteria;p__Bacteroidetes;c__Flavobacteriia;o__Flavobacteriales;f__Flavobacteriaceae;g__Lacinutrix             | 4.18E-05      | 1.42E-05   | 0.0001624   | 0.00013255 | 0.00017934 | 0.00026467 | 0.00535365 |       |       |       |       |       |       |       |
| k_Bacteria;p__Bacteroidetes;c__Flavobacteriia;o__Flavobacteriales;f__Flavobacteriaceae;g__Leeuwenhoekella        | 6.97E-05      | 2.85E-05   | 0           | 0          | 0          | 0          | 3.06E-05   |       |       |       |       |       |       |       |
| k_Bacteria;p__Bacteroidetes;c__Flavobacteriia;o__Flavobacteriales;f__Flavobacteriaceae;g__Lutimonas              | 0             | 0          | 1.35E-05    | 5.89E-05   | 5.98E-05   | 5.29E-05   | 0          |       |       |       |       |       |       |       |
| k_Bacteria;p__Bacteroidetes;c__Flavobacteriia;o__Flavobacteriales;f__Flavobacteriaceae;g__Maribacter             | 4.18E-05      | 8.55E-05   | 2.71E-05    | 8.84E-05   | 0          | 5.29E-05   | 9.18E-05   |       |       |       |       |       |       |       |
| k_Bacteria;p__Bacteroidetes;c__Flavobacteriia;o__Flavobacteriales;f__Flavobacteriaceae;g__Mesonia                | 6.97E-05      | 2.85E-05   | 0           | 0          | 2.99E-05   | 3.97E-05   | 0          |       |       |       |       |       |       |       |
| k_Bacteria;p__Bacteroidetes;c__Flavobacteriia;o__Flavobacteriales;f__Flavobacteriaceae;g__Olleya                 | 0.0022861     | 0.00286276 | 4.06E-05    | 0          | 0.00011956 | 6.62E-05   | 0.00486417 |       |       |       |       |       |       |       |
| k_Bacteria;p__Bacteroidetes;c__Flavobacteriia;o__Flavobacteriales;f__Flavobacteriaceae;g__Persicivirga           | 0.00011152    | 0.00022788 | 0           | 0          | 0          | 0          | 0          |       |       |       |       |       |       |       |
| k_Bacteria;p__Bacteroidetes;c__Flavobacteriia;o__Flavobacteriales;f__Flavobacteriaceae;g__Polaribacter           | 0.00122669    | 0.00209366 | 0.01148974  | 0.01044213 | 0.02128168 | 0.02293329 | 0.01064611 |       |       |       |       |       |       |       |
| k_Bacteria;p__Bacteroidetes;c__Flavobacteriia;o__Flavobacteriales;f__Flavobacteriaceae;g__Pontirhabdus           | 0             | 0          | 0           | 2.95E-05   | 0          | 3.97E-05   | 0          |       |       |       |       |       |       |       |
| k_Bacteria;p__Bacteroidetes;c__Flavobacteriia;o__Flavobacteriales;f__Flavobacteriaceae;g__Psychroserpens         | 0.00016728    | 0.00021364 | 0.0008932   | 0.00145807 | 0.00062769 | 0.00124393 | 0.00718918 |       |       |       |       |       |       |       |
| k_Bacteria;p__Bacteroidetes;c__Flavobacteriia;o__Flavobacteriales;f__Flavobacteriaceae;g__Robiginitalea          | 0             | 0          | 0           | 0          | 2.99E-05   | 3.97E-05   | 0          |       |       |       |       |       |       |       |
| k_Bacteria;p__Bacteroidetes;c__Flavobacteriia;o__Flavobacteriales;f__Flavobacteriaceae;g__Sediminicola           | 0.00900499    | 0.01915627 | 0.00933795  | 0.00845386 | 0.02561573 | 0.02650628 | 0.00452766 |       |       |       |       |       |       |       |
| k_Bacteria;p__Bacteroidetes;c__Flavobacteriia;o__Flavobacteriales;f__Flavobacteriaceae;g__Tenacibaculum          | 0.00160306    | 0.0036461  | 0.00403291  | 0.00550826 | 0.01099952 | 0.01423902 | 0.0035793  |       |       |       |       |       |       |       |
| k_Bacteria;p__Bacteroidetes;c__Flavobacteriia;o__Flavobacteriales;f__Flavobacteriaceae;g__Ulvibacter             | 0.00016728    | 0.00014243 | 0.00147513  | 0.00176736 | 0.00107604 | 0.00116453 | 0.00048948 |       |       |       |       |       |       |       |
| k_Bacteria;p__Bacteroidetes;c__Flavobacteriia;o__Flavobacteriales;f__Flavobacteriaceae;g__Winogradskyella        | 5.58E-05      | 2.85E-05   | 0.0001218   | 0.00029456 | 0.00035868 | 0.0008734  | 0.00045888 |       |       |       |       |       |       |       |
| k_Bacteria;p__Bacteroidetes;c__Flavobacteriia;o__Flavobacteriales;f__NS9;g__                                     | 0.00041819    | 0.00059819 | 0.00710496  | 0.00297505 | 0.00146461 | 0.00182619 | 0.00296745 |       |       |       |       |       |       |       |
| k_Bacteria;p__Bacteroidetes;c__Flavobacteriia;o__Flavobacteriales;f__[Weeksellaceae];g__                         | 0             | 4.27E-05   | 0           | 0          | 0          | 0          | 0          |       |       |       |       |       |       |       |
| k_Bacteria;p__Bacteroidetes;c__Flavobacteriia;o__Flavobacteriales;f__[Weeksellaceae];g__Chryseobacterium         | 0             | 0          | 0           | 0          | 0          | 0          | 0          |       |       |       |       |       |       |       |
| k_Bacteria;p__Bacteroidetes;c__Flavobacteriia;o__Flavobacteriales;f__[Weeksellaceae];g__Cloacibacterium          | 0             | 0          | 0           | 0          | 0          | 0          | 0          |       |       |       |       |       |       |       |
| k_Bacteria;p__Bacteroidetes;c__Flavobacteriia;o__Flavobacteriales;f__[Weeksellaceae];g__Weeksella                | 0             | 0          | 0           | 0          | 0          | 0          | 0          |       |       |       |       |       |       |       |
| k_Bacteria;p__Bacteroidetes;c__Sphingobacteriia;o__Sphingobacteriales;f__g__                                     | 0.003694      | 0.00609582 | 1.35E-05    | 1.47E-05   | 0.00014945 | 0.00021173 | 0.00018355 |       |       |       |       |       |       |       |
| k_Bacteria;p__Bacteroidetes;c__Sphingobacteriia;o__Sphingobacteriales;f__NS11-12;g__                             | 5.58E-05      | 0          | 0.00224652  | 0.00145807 | 0.00280966 | 0.00203793 | 0.00104014 |       |       |       |       |       |       |       |
| k_Bacteria;p__Bacteroidetes;c__Sphingobacteriia;o__Sphingobacteriales;f__Sphingobacteriaceae;g__Pedobacter       | 0             | 0          | 0           | 0          | 2.99E-05   | 0          | 0          |       |       |       |       |       |       |       |
| k_Bacteria;p__Bacteroidetes;c__Sphingobacteriia;o__Sphingobacteriales;f__Sphingobacteriaceae;g__Sphingobacterium | 0             | 0          | 0           | 0          | 0          | 0          | 0          |       |       |       |       |       |       |       |
| k_Bacteria;p__Bacteroidetes;c__VC2_1_Bac22;o__f__g__                                                             | 0             | 0          | 0           | 0          | 0          | 0          | 0          |       |       |       |       |       |       |       |
| k_Bacteria;p__Bacteroidetes;c__[Rhodothermii];o__[Rhodothermales];f__[Balneolaceae];g__Balneola                  | 0             | 0          | 0           | 0          | 0          | 1.32E-05   | 0          |       |       |       |       |       |       |       |
| k_Bacteria;p__Bacteroidetes;c__[Saprospirae];o__[Saprospirales];f__g__                                           | 0             | 0          | 0           | 0          | 0          | 0          | 6.12E-05   |       |       |       |       |       |       |       |
| k_Bacteria;p__Bacteroidetes;c__[Saprospirae];o__[Saprospirales];f__Chitinophagaceae;g__                          | 1.39E-05      | 0          | 0           | 1.47E-05   | 0          | 0          | 0          |       |       |       |       |       |       |       |
| k_Bacteria;p__Bacteroidetes;c__[Saprospirae];o__[Saprospirales];f__Chitinophagaceae;g__Chitinophaga              | 0             | 0          | 0           | 0          | 0          | 0          | 0          |       |       |       |       |       |       |       |
| k_Bacteria;p__Bacteroidetes;c__[Saprospirae];o__[Saprospirales];f__Chitinophagaceae;g__Niabella                  | 0             | 0          | 0           | 0          | 0          | 0          | 0          |       |       |       |       |       |       |       |
| k_Bacteria;p__Bacteroidetes;c__[Saprospirae];o__[Saprospirales];f__Chitinophagaceae;g__Sediminibacterium         | 0             | 0          | 0           | 0          | 0          | 0          | 0          |       |       |       |       |       |       |       |
| k_Bacteria;p__Bacteroidetes;c__[Saprospirae];o__[Saprospirales];f__Saprospiraceae;g__                            | 0             | 2.85E-05   | 0.00078493  | 0.00076585 | 0.00068747 | 0.00041023 | 0.00055066 |       |       |       |       |       |       |       |
| k_Bacteria;p__Bacteroidetes;c__[Saprospirae];o__[Saprospirales];f__Saprospiraceae;g__Lewinella                   | 0             | 0          | 0           | 4.42E-05   | 5.98E-05   | 2.65E-05   | 0          |       |       |       |       |       |       |       |
| k_Bacteria;p__Bacteroidetes;c__[Saprospirae];o__[Saprospirales];f__Saprospiraceae;g__Saprosira                   | 0             | 0          | 0.00021653  | 0.00064803 | 5.98E-05   | 9.26E-05   | 3.06E-05   |       |       |       |       |       |       |       |
| k_Bacteria;p__Chlamydiae;c__Chlamydia;o__Chlamydiales;f__g__                                                     | 0             | 0          | 0           | 0          | 0          | 1.32E-05   | 0          |       |       |       |       |       |       |       |
| k_Bacteria;p__Chloroflexi;c__Anaerolineae;o__Caldilineales;f__Caldilineaceae;g__                                 | 0             | 0          | 0           | 0          | 0          | 0          | 0          |       |       |       |       |       |       |       |
| k_Bacteria;p__Chloroflexi;c__Anaerolineae;o__GA004;f__g__                                                        | 0             | 0          | 0           | 0          | 0.00011956 | 0          | 0          |       |       |       |       |       |       |       |
| k_Bacteria;p__Chloroflexi;c__Chloroflexi;o__[Roseiflexales];f__g__                                               | 0             | 0          | 0           | 0          | 0          | 0          | 0          |       |       |       |       |       |       |       |
| k_Bacteria;p__Chloroflexi;c__Ellin6529;o__f__g__                                                                 | 0             | 0          | 0           | 0          | 0          | 0          | 0          |       |       |       |       |       |       |       |
| k_Bacteria;p__Chloroflexi;c__Gitt-GS-136;o__f__g__                                                               | 0             | 0          | 0           | 0          | 0          | 0          | 0          |       |       |       |       |       |       |       |
| k_Bacteria;p__Chloroflexi;c__S085;o__f__g__                                                                      | 0             | 0          | 0           | 0          | 0          | 0          | 0          |       |       |       |       |       |       |       |
| k_Bacteria;p__Chloroflexi;c__SAR202;o__f__g__                                                                    | 0             | 0          | 1.35E-05    | 0          | 0          | 0          | 0          |       |       |       |       |       |       |       |
| k_Bacteria;p__Chloroflexi;c__TK10;o__AKYG885;f__Dolo_23;g__                                                      | 0             | 0          | 0           | 0          | 0          | 0          | 0          |       |       |       |       |       |       |       |
| k_Bacteria;p__Cyanobacteria;c__4C04-2;o__MLE1-12;f__g__                                                          | 0             | 0          | 0           | 0          | 0          | 0          | 0          |       |       |       |       |       |       |       |
| k_Bacteria;p__Cyanobacteria;c__4C04-2;o__Y52;f__g__                                                              | 0             | 0          | 0           | 0          | 0          | 0          | 0          |       |       |       |       |       |       |       |
| k_Bacteria;p__Cyanobacteria;c__Chloroplast;o__f__g__                                                             | 5.58E-05      | 0          | 0.00021653  | 0.0002651  | 0.00182329 | 0.00189236 | 0.00027533 |       |       |       |       |       |       |       |
| k_Bacteria;p__Cyanobacteria;c__Chloroplast;o__Cercozoa;f__g__                                                    | 0             | 0          | 0           | 0          | 0          | 5.29E-05   | 0          |       |       |       |       |       |       |       |
| k_Bacteria;p__Cyanobacteria;c__Chloroplast;o__Chlorophyta;f__g__                                                 | 0.0014079     | 0.00501339 | 0.00116386  | 0.001841   | 0.00104083 | 0.00210409 | 0.00024474 |       |       |       |       |       |       |       |
| k_Bacteria;p__Cyanobacteria;c__Chloroplast;o__Chlorophyta;f__Mamiellaceae;g__                                    | 0.00119881    | 0.00649462 | 0.00217886  | 0.00356417 | 0.00230153 | 0.00637845 | 0.00061185 |       |       |       |       |       |       |       |
| k_Bacteria;p__Cyanobacteria;c__Chloroplast;o__Chlorophyta;f__Mamiellaceae;g__Micromonas                          | 0             | 4.27E-05   | 5.41E-05    | 0.00011782 | 5.98E-05   | 0.0001588  | 9.18E-05   |       |       |       |       |       |       |       |
| k_Bacteria;p__Cyanobacteria;c__Chloroplast;o__Chlorophyta;f__Trebouxiophyceae;g__                                | 0             | 0          | 0           | 1.47E-05   | 0          | 6.62E-05   | 0          |       |       |       |       |       |       |       |
| k_Bacteria;p__Cyanobacteria;c__Chloroplast;o__Cryptophyta;f__g__                                                 | 1.39E-05      | 0          | 0.0009744   | 0.00279832 | 0.01877092 | 0.02176876 | 0.00097895 |       |       |       |       |       |       |       |
| k_Bacteria;p__Cyanobacteria;c__Chloroplast;o__Haptophyceae;f__g__                                                | 2.79E-05      | 7.12E-05   | 0.00108266  | 0.00572918 | 0.03634625 | 0.0497704  | 0.00195791 |       |       |       |       |       |       |       |
| k_Bacteria;p__Cyanobacteria;c__Chloroplast;o__Rhodophyta;f__g__                                                  | 0             | 0          | 0           | 0          | 1.47E-05   | 0          | 0          |       |       |       |       |       |       |       |
| k_Bacteria;p__Cyanobacteria;c__Chloroplast;o__Stramenopiles;f__g__                                               | 0.0008782     | 0.00049849 | 0.18226601  | 0.05580429 | 0.0430715  | 0.04331256 | 0.007128   |       |       |       |       |       |       |       |
| k_Bacteria;p__Cyanobacteria;c__Chloroplast;o__Streptophyta;f__g__                                                | 0             | 5.70E-05   | 0           | 0.00022092 | 5.98E-05   | 6.62E-05   | 0          |       |       |       |       |       |       |       |
| k_Bacteria;p__Cyanobacteria;c__Nostocophycidae;o__Nostocales;f__Nostocaceae;g__                                  | 0             | 0          | 0           | 0          | 0          | 0          | 0          |       |       |       |       |       |       |       |
| k_Bacteria;p__Cyanobacteria;c__Nostocophycidae;o__Stigonematales;f__Rivulariaceae;g__Calothrix                   | 0             | 0          | 0           | 0          | 0          | 0          | 0          |       |       |       |       |       |       |       |
| k_Bacteria;p__Cyanobacteria;c__Nostocophycidae;o__Chroococcales;f__Cyanobacteriaceae;g__                         | 0             | 0          | 0           | 2.95E-05   | 0.00050813 | 0.0004367  | 0.00052007 |       |       |       |       |       |       |       |
| k_Bacteria;p__Cyanobacteria;c__Nostocophycidae;o__Chroococcales;f__Cyanobacteriaceae;g__Microcystis              | 0             | 9.97E-05   | 0           | 0          | 0          | 0          | 0          |       |       |       |       |       |       |       |
| k_Bacteria;p__Cyanobacteria;c__Nostocophycidae;o__Chroococcales;f__Xenococcaceae;g__                             | 0             | 4.27E-05   | 0           | 8.84E-05   | 0          | 3.97E-05   | 0          |       |       |       |       |       |       |       |
| k_Bacteria;p__Cyanobacteria;c__Synecococophycidae;o__Pseudanabaenales;f__Pseudanabaenaceae;g__                   | 0             | 2.85E-05   | 0           | 0          | 2.99E-05   | 2.65E-05   | 0          |       |       |       |       |       |       |       |
| k_Bacteria;p__Cyanobacteria;c__Synecococophycidae;o__Pseudanabaenales;f__Pseudanabaenaceae;g__Pseudanabaena      | 0             | 0          | 0           | 0          | 0          | 0          | 0          |       |       |       |       |       |       |       |
| k_Bacteria;p__Cyanobacteria;c__Synecococophycidae;o__Synecococales;f__Synecococcaceae;g__Prochlorococcus         | 0             | 0          | 0           | 0          | 0          | 0          | 0          |       |       |       |       |       |       |       |
| k_Bacteria;p__Cyanobacteria;c__Synecococophycidae;o__Synecococales;f__Synecococcaceae;g__Synecococcus            | 0.00011152    | 0.00025637 | 0.00328858  | 0.00848331 | 0.01551291 | 0.02048513 | 0.06032795 |       |       |       |       |       |       |       |
| k_Bacteria;p__FBP;c__o__f__g__                                                                                   | 0             | 0          | 0           | 0          | 0          | 5.29E-05   | 0          |       |       |       |       |       |       |       |
| k_Bacteria;p__Firmicutes;c__Firmicutes;o__Firmicutes;f__g__                                                      | 0             | 0          | 0.00041953  | 0.00039766 | 2.99E-05   | 0          | 0          |       |       |       |       |       |       |       |
| k_Bacteria;p__Firmicutes;c__Bacilli;o__Bacillales;f__g__                                                         | 0             | 0          | 0           | 0          | 0          | 0          | 0          |       |       |       |       |       |       |       |
| k_Bacteria;p__Firmicutes;c__Bacilli;o__Bacillales;f__Bacillaceae;g__Anoxybacillus                                | 0             | 0          | 0           | 0          | 0          | 0          | 0          |       |       |       |       |       |       |       |
| k_Bacteria;p__Firmicutes;c__Bacilli;o__Bacillales;f__Bacillaceae;g__Bacillus                                     | 2.79E-05      | 0          | 0           | 0          | 0          | 0          | 0          |       |       |       |       |       |       |       |
| k_Bacteria;p__Firmicutes;c__Bacilli;o__Bacillales;f__Bacillaceae;g__Geobacillus                                  | 0             | 0          | 0           | 0          | 0          | 0          | 0          |       |       |       |       |       |       |       |
| k_Bacteria;p__Firmicutes;c__Bacilli;o__Bacillales;f__Bacillaceae;g__Marinococcus                                 | 0             | 0          | 0           | 0          | 0          | 0          | 0          |       |       |       |       |       |       |       |
| k_Bacteria;p__Firmicutes;c__Bacilli;o__Bacillales;f__Listeriaceae;g__                                            | 0             | 0          | 0           | 0          | 2.99E-05   | 0          | 0          |       |       |       |       |       |       |       |
| k_Bacteria;p__Firmicutes;c__Bacilli;o__Bacillales;f__Listeriaceae;g__Brochothrix                                 | 0             | 0          | 0           | 0          | 0          | 0          | 0          |       |       |       |       |       |       |       |

| Taxon                                                                                                                 | 2028          |             | 2029        |            | 1184       | 1196       | 1245     | 1246     | 2019 |
|-----------------------------------------------------------------------------------------------------------------------|---------------|-------------|-------------|------------|------------|------------|----------|----------|------|
|                                                                                                                       | Copepod genus | Centropages | Centropages | Water      | Water      | Water      | Water    | Water    |      |
| Type of sample                                                                                                        | Starved       | Starved     | Water       | Water      | Water      | Water      | Water    | Water    |      |
| k_Bacteria;p__Firmicutes;c__Bacilli;o__Bacillales;f__Paenibacillaceae;g__Paenibacillus                                | 0             | 0           | 0           | 0          | 0          | 0          | 5.29E-05 | 0        |      |
| k_Bacteria;p__Firmicutes;c__Bacilli;o__Bacillales;f__Planococcaceae;g__                                               | 0             | 0           | 0           | 0          | 0          | 0          | 0        | 0        |      |
| k_Bacteria;p__Firmicutes;c__Bacilli;o__Bacillales;f__Planococcaceae;g__Bacillus                                       | 0             | 0           | 0           | 0          | 0          | 0          | 0        | 0        |      |
| k_Bacteria;p__Firmicutes;c__Bacilli;o__Bacillales;f__Planococcaceae;g__Planococcus                                    | 0             | 0           | 0           | 0          | 0          | 0          | 0        | 0        |      |
| k_Bacteria;p__Firmicutes;c__Bacilli;o__Bacillales;f__Planococcaceae;g__Planomicrobium                                 | 0             | 0           | 0           | 0          | 0          | 0          | 0        | 0        |      |
| k_Bacteria;p__Firmicutes;c__Bacilli;o__Bacillales;f__Staphylococcaceae;g__Jeotgallium                                 | 0             | 0           | 0           | 0          | 0          | 0          | 0        | 0        |      |
| k_Bacteria;p__Firmicutes;c__Bacilli;o__Bacillales;f__Staphylococcaceae;g__Staphylococcus                              | 0             | 4.27E-05    | 0           | 0          | 0          | 0          | 1.32E-05 | 0        |      |
| k_Bacteria;p__Firmicutes;c__Bacilli;o__Bacillales;f__Thermoactinomycetaceae;g__                                       | 0             | 0           | 0           | 0          | 0          | 0          | 0        | 0        |      |
| k_Bacteria;p__Firmicutes;c__Bacilli;o__Bacillales;f__Thermoactinomycetaceae;g__Planifilum                             | 0             | 0           | 0           | 0          | 0          | 0          | 0        | 0        |      |
| k_Bacteria;p__Firmicutes;c__Bacilli;o__Bacillales;f__[Exiguobacteraceae];g__Exiguobacterium                           | 0             | 0           | 0           | 0          | 0          | 0          | 0        | 0        |      |
| k_Bacteria;p__Firmicutes;c__Bacilli;o__Bacillales;f__[Thermicaceae];g__Thermicanus                                    | 0             | 0           | 0           | 0          | 0          | 0          | 0        | 0        |      |
| k_Bacteria;p__Firmicutes;c__Bacilli;o__Gemellales;f__Gemellaceae;g__                                                  | 1.39E-05      | 1.42E-05    | 0           | 0          | 0          | 0          | 0        | 0        |      |
| k_Bacteria;p__Firmicutes;c__Bacilli;o__Gemellales;f__Gemellaceae;g__Gemella                                           | 0             | 0           | 0           | 0          | 0          | 0          | 0        | 0        |      |
| k_Bacteria;p__Firmicutes;c__Bacilli;o__Lactobacillales;f__Aerococcaceae;g__                                           | 0             | 0           | 0           | 0          | 0          | 0          | 0        | 0        |      |
| k_Bacteria;p__Firmicutes;c__Bacilli;o__Lactobacillales;f__Aerococcaceae;g__Aerococcus                                 | 0             | 0           | 0           | 0          | 0          | 0          | 0        | 0        |      |
| k_Bacteria;p__Firmicutes;c__Bacilli;o__Lactobacillales;f__Aerococcaceae;g__Alloiooccus                                | 0             | 0           | 0           | 0          | 0          | 0          | 0        | 0        |      |
| k_Bacteria;p__Firmicutes;c__Bacilli;o__Lactobacillales;f__Aerococcaceae;g__Facklamia                                  | 0             | 0           | 0           | 0          | 0          | 0          | 0        | 0        |      |
| k_Bacteria;p__Firmicutes;c__Bacilli;o__Lactobacillales;f__Aerococcaceae;g__Marinilactibacillus                        | 0             | 0           | 0           | 0          | 0          | 0          | 0        | 0        |      |
| k_Bacteria;p__Firmicutes;c__Bacilli;o__Lactobacillales;f__Carnobacteriaceae;g__                                       | 0             | 0           | 0           | 0          | 0          | 0          | 0        | 0        |      |
| k_Bacteria;p__Firmicutes;c__Bacilli;o__Lactobacillales;f__Carnobacteriaceae;g__Granulicatella                         | 0             | 0           | 0           | 0          | 0          | 0          | 0        | 0        |      |
| k_Bacteria;p__Firmicutes;c__Bacilli;o__Lactobacillales;f__Carnobacteriaceae;g__Trichococcus                           | 0             | 0           | 0           | 0          | 0          | 0          | 1.32E-05 | 0        |      |
| k_Bacteria;p__Firmicutes;c__Bacilli;o__Lactobacillales;f__Enterococcaceae;g__Enterococcus                             | 0             | 0           | 0           | 1.47E-05   | 0          | 0          | 5.29E-05 | 0        |      |
| k_Bacteria;p__Firmicutes;c__Bacilli;o__Lactobacillales;f__Lactobacillaceae;g__Lactobacillus                           | 0             | 0           | 0           | 0          | 0          | 0          | 0        | 0        |      |
| k_Bacteria;p__Firmicutes;c__Bacilli;o__Lactobacillales;f__Leuconostocaceae;g__                                        | 0             | 0           | 0           | 0          | 0          | 0          | 0        | 0        |      |
| k_Bacteria;p__Firmicutes;c__Bacilli;o__Lactobacillales;f__Leuconostocaceae;g__Leuconostoc                             | 0             | 0           | 0           | 0          | 0          | 0          | 0        | 0        |      |
| k_Bacteria;p__Firmicutes;c__Bacilli;o__Lactobacillales;f__Leuconostocaceae;g__Weissella                               | 0             | 0           | 0           | 0          | 0          | 0          | 0        | 0        |      |
| k_Bacteria;p__Firmicutes;c__Bacilli;o__Lactobacillales;f__Streptococcaceae;g__Lactococcus                             | 0             | 0           | 0           | 0          | 0          | 0          | 0        | 0        |      |
| k_Bacteria;p__Firmicutes;c__Bacilli;o__Lactobacillales;f__Streptococcaceae;g__Streptococcus                           | 0             | 7.12E-05    | 0           | 0          | 2.99E-05   | 0          | 1.32E-05 | 0        |      |
| k_Bacteria;p__Firmicutes;c__Clostridia;o__Clostridiales;f__g__                                                        | 0             | 0           | 0           | 0          | 0          | 0          | 2.65E-05 | 0        |      |
| k_Bacteria;p__Firmicutes;c__Clostridia;o__Clostridiales;f__Clostridiaceae;g__                                         | 0             | 0           | 0           | 0          | 0          | 0          | 6.62E-05 | 0        |      |
| k_Bacteria;p__Firmicutes;c__Clostridia;o__Clostridiales;f__Clostridiaceae;g__Clostridium                              | 0             | 0           | 1.35E-05    | 0          | 0          | 0          | 1.32E-05 | 0        |      |
| k_Bacteria;p__Firmicutes;c__Clostridia;o__Clostridiales;f__Lachnospiraceae;g__                                        | 0             | 0           | 0           | 0          | 2.99E-05   | 0          | 5.29E-05 | 0        |      |
| k_Bacteria;p__Firmicutes;c__Clostridia;o__Clostridiales;f__Lachnospiraceae;g__Blautia                                 | 0             | 0           | 0           | 0          | 0          | 0          | 0        | 0        |      |
| k_Bacteria;p__Firmicutes;c__Clostridia;o__Clostridiales;f__Lachnospiraceae;g__Dorea                                   | 0             | 0           | 0           | 0          | 0          | 0          | 0        | 0        |      |
| k_Bacteria;p__Firmicutes;c__Clostridia;o__Clostridiales;f__Lachnospiraceae;g__Moryella                                | 0             | 0           | 0           | 0          | 0          | 0          | 0        | 0        |      |
| k_Bacteria;p__Firmicutes;c__Clostridia;o__Clostridiales;f__Lachnospiraceae;g__Oribacterium                            | 0             | 0           | 0           | 0          | 0          | 0          | 0        | 0        |      |
| k_Bacteria;p__Firmicutes;c__Clostridia;o__Clostridiales;f__Lachnospiraceae;g__[Ruminococcus]                          | 0             | 0           | 0           | 0          | 0          | 5.98E-05   | 0        | 0        |      |
| k_Bacteria;p__Firmicutes;c__Clostridia;o__Clostridiales;f__Peptostreptococcaceae;g__                                  | 0             | 0           | 0           | 0          | 2.99E-05   | 0          | 1.32E-05 | 0        |      |
| k_Bacteria;p__Firmicutes;c__Clostridia;o__Clostridiales;f__Ruminococcaceae;g__                                        | 0             | 0           | 0           | 0          | 0.00014945 | 0          | 6.62E-05 | 0        |      |
| k_Bacteria;p__Firmicutes;c__Clostridia;o__Clostridiales;f__Ruminococcaceae;g__Clostridium                             | 0             | 0           | 0           | 0          | 0          | 0          | 0        | 0        |      |
| k_Bacteria;p__Firmicutes;c__Clostridia;o__Clostridiales;f__Ruminococcaceae;g__Faecalibacterium                        | 0             | 0           | 0           | 0          | 0          | 0.00010587 | 0        | 0        |      |
| k_Bacteria;p__Firmicutes;c__Clostridia;o__Clostridiales;f__Ruminococcaceae;g__Oscillospira                            | 0             | 0           | 0           | 0          | 0          | 0          | 1.32E-05 | 0        |      |
| k_Bacteria;p__Firmicutes;c__Clostridia;o__Clostridiales;f__Veillonellaceae;g__                                        | 0             | 0           | 0           | 0          | 0          | 0          | 6.62E-05 | 0        |      |
| k_Bacteria;p__Firmicutes;c__Clostridia;o__Clostridiales;f__Veillonellaceae;g__Anaeromusa                              | 0             | 0           | 0           | 0          | 5.98E-05   | 0          | 3.97E-05 | 0        |      |
| k_Bacteria;p__Firmicutes;c__Clostridia;o__Clostridiales;f__Veillonellaceae;g__Dialister                               | 0             | 0           | 0           | 0          | 0          | 0          | 0        | 0        |      |
| k_Bacteria;p__Firmicutes;c__Clostridia;o__Clostridiales;f__Veillonellaceae;g__Pelosinus                               | 0             | 0           | 0           | 0          | 0          | 0          | 1.32E-05 | 0        |      |
| k_Bacteria;p__Firmicutes;c__Clostridia;o__Clostridiales;f__Veillonellaceae;g__Phascolarctobacterium                   | 0             | 0           | 0           | 0          | 2.99E-05   | 0          | 1.32E-05 | 0        |      |
| k_Bacteria;p__Firmicutes;c__Clostridia;o__Clostridiales;f__Veillonellaceae;g__Selenomonas                             | 0             | 0           | 0           | 0          | 0          | 0          | 0        | 0        |      |
| k_Bacteria;p__Firmicutes;c__Clostridia;o__Clostridiales;f__Veillonellaceae;g__Veillonella                             | 0             | 0           | 0           | 0          | 0          | 0          | 0        | 0        |      |
| k_Bacteria;p__Firmicutes;c__Clostridia;o__Clostridiales;f__[Acidaminobacteraceae];g__Fusibacter                       | 0             | 0           | 0           | 0          | 2.99E-05   | 0          | 1.32E-05 | 0        |      |
| k_Bacteria;p__Firmicutes;c__Clostridia;o__Clostridiales;f__[Acidaminobacteraceae];g__WH1-8                            | 0             | 0           | 0           | 1.47E-05   | 0          | 0          | 2.65E-05 | 0        |      |
| k_Bacteria;p__Firmicutes;c__Clostridia;o__Clostridiales;f__[Mogibacteriaceae];g__                                     | 0             | 0           | 0           | 0          | 0          | 0          | 0        | 0        |      |
| k_Bacteria;p__Firmicutes;c__Clostridia;o__Clostridiales;f__[Mogibacteriaceae];g__Mogibacterium                        | 0             | 0           | 0           | 0          | 0          | 0          | 0        | 0        |      |
| k_Bacteria;p__Firmicutes;c__Clostridia;o__Clostridiales;f__[Tissierellaceae];g__Anaerococcus                          | 0             | 0           | 0           | 0          | 0          | 0          | 0        | 0        |      |
| k_Bacteria;p__Firmicutes;c__Clostridia;o__Clostridiales;f__[Tissierellaceae];g__Finigoldia                            | 0             | 0           | 0           | 0          | 0          | 0          | 0        | 0        |      |
| k_Bacteria;p__Firmicutes;c__Clostridia;o__Clostridiales;f__[Tissierellaceae];g__Gallicola                             | 0             | 0           | 0           | 0          | 0          | 0          | 0        | 0        |      |
| k_Bacteria;p__Firmicutes;c__Clostridia;o__Clostridiales;f__[Tissierellaceae];g__Parvimonas                            | 0             | 0           | 0           | 0          | 0          | 0          | 0        | 0        |      |
| k_Bacteria;p__Firmicutes;c__Clostridia;o__Clostridiales;f__[Tissierellaceae];g__Peptoniphilus                         | 0             | 0           | 0           | 0          | 0          | 0          | 0        | 0        |      |
| k_Bacteria;p__Firmicutes;c__Clostridia;o__Clostridiales;f__[Tissierellaceae];g__WAL_1855D                             | 0             | 0           | 0           | 0          | 0          | 0          | 0        | 0        |      |
| k_Bacteria;p__Firmicutes;c__Clostridia;o__Thermoanaerobacterales;f__Caldicellulosiruptoraceae;g__Caldicellulosiruptor | 0             | 0           | 0           | 0          | 0          | 0          | 0        | 0        |      |
| k_Bacteria;p__Firmicutes;c__Erysipelotrichi;o__Erysipelotrichales;f__Erysipelotrichaceae;g__                          | 0             | 0           | 0           | 0          | 0          | 0          | 0        | 0        |      |
| k_Bacteria;p__Firmicutes;c__Erysipelotrichi;o__Erysipelotrichales;f__Erysipelotrichaceae;g__Coprobacillus             | 0             | 0           | 0           | 0          | 0          | 0          | 0        | 0        |      |
| k_Bacteria;p__Firmicutes;c__Erysipelotrichi;o__Erysipelotrichales;f__Erysipelotrichaceae;g__RFN20                     | 0             | 0           | 0           | 0          | 0          | 0          | 0        | 0        |      |
| k_Bacteria;p__Firmicutes;c__Erysipelotrichi;o__Erysipelotrichales;f__Erysipelotrichaceae;g__[Eubacterium]             | 0             | 0           | 0           | 0          | 0          | 0          | 0        | 0        |      |
| k_Bacteria;p__Fusobacteria;c__Fusobacteria;o__Fusobacteriales;f__g__                                                  | 0             | 0           | 0           | 0          | 8.97E-05   | 0.00017203 | 0        | 0        |      |
| k_Bacteria;p__Fusobacteria;c__Fusobacteria;o__Fusobacteriales;f__Fusobacteriaceae;g__Cetobacterium                    | 0             | 0           | 0           | 2.95E-05   | 0          | 0          | 0        | 0        |      |
| k_Bacteria;p__Fusobacteria;c__Fusobacteria;o__Fusobacteriales;f__Fusobacteriaceae;g__Fusobacterium                    | 0             | 4.27E-05    | 0           | 2.95E-05   | 0          | 0          | 3.97E-05 | 0        |      |
| k_Bacteria;p__Fusobacteria;c__Fusobacteria;o__Fusobacteriales;f__Fusobacteriaceae;g__Propionigenium                   | 0             | 0           | 0           | 0          | 0          | 0          | 2.65E-05 | 0        |      |
| k_Bacteria;p__Fusobacteria;c__Fusobacteria;o__Fusobacteriales;f__Fusobacteriaceae;g__Psychryliobacter                 | 0             | 0           | 0           | 4.42E-05   | 2.99E-05   | 0          | 7.94E-05 | 0        |      |
| k_Bacteria;p__Fusobacteria;c__Fusobacteria;o__Fusobacteriales;f__Fusobacteriaceae;g__u114                             | 0             | 0           | 0           | 0          | 0          | 0          | 2.99E-05 | 6.62E-05 |      |
| k_Bacteria;p__Fusobacteria;c__Fusobacteria;o__Fusobacteriales;f__Leptotrichiaceae;g__Leptotrichia                     | 0             | 1.42E-05    | 0           | 0          | 5.98E-05   | 0          | 3.97E-05 | 3.06E-05 |      |
| k_Bacteria;p__GN02;c__o__f__g__                                                                                       | 0             | 0           | 0           | 1.47E-05   | 0          | 0          | 2.99E-05 | 0        |      |
| k_Bacteria;p__GN02;c__BD1-5;o__f__g__                                                                                 | 0.01208564    | 0.01807383  | 1.35E-05    | 0.00013255 | 8.97E-05   | 0          | 9.26E-05 | 3.06E-05 |      |
| k_Bacteria;p__GN02;c__IB17;o__f__g__                                                                                  | 0             | 0           | 0           | 1.47E-05   | 0          | 0          | 0        | 0        |      |

| Taxon                                                                                                      | 2028        | 2029        | 1184       | 1196       | 1245       | 1246       | 2019       |
|------------------------------------------------------------------------------------------------------------|-------------|-------------|------------|------------|------------|------------|------------|
| Copepod genus                                                                                              | Centropages | Centropages | Water      | Water      | Water      | Water      | Water      |
| Type of sample                                                                                             | Starved     | Starved     | Water      | Water      | Water      | Water      | Water      |
| k_Bacteria;p_Gemmatimonadetes;c_Gemmatimonadetes;o_f_r_g                                                   | 0           | 0           | 0          | 0          | 0          | 0          | 0          |
| k_Bacteria;p_Gemmatimonadetes;c_Gemmatimonadetes;o_Gemmatimonadales;f_r_g                                  | 0           | 0           | 0          | 0          | 0          | 0          | 0          |
| k_Bacteria;p_Lentisphaerae;c_Lentisphaeria;o_Lentisphaerales;f_r_g                                         | 0           | 0           | 0          | 0          | 2.99E-05   | 0          | 0          |
| k_Bacteria;p_Lentisphaerae;c_Lentisphaeria;o_Lentisphaerales;f_Lentisphaeraeae;g_r_g                       | 0           | 0           | 0          | 1.47E-05   | 0          | 0          | 0          |
| k_Bacteria;p_Lentisphaerae;c_Lentisphaeria;o_Lentisphaerales;f_Lentisphaeraeae;g_Lentisphaera              | 0           | 0           | 0          | 0          | 0          | 0          | 0          |
| k_Bacteria;p_Lentisphaerae;c_Lentisphaeria;o_Victivallales;f_Victivallaceae;g_r_g                          | 0           | 0           | 0          | 0          | 0          | 1.32E-05   | 0          |
| k_Bacteria;p_NKB19;c_SHAB590;o_f_r_g                                                                       | 0           | 0           | 0          | 0          | 2.99E-05   | 0          | 0          |
| k_Bacteria;p_Nitrospirae;c_Nitrospira;o_Nitrospirales;f_Nitrospiraceae;g_r_g                               | 0           | 0           | 0          | 0          | 0          | 1.32E-05   | 0          |
| k_Bacteria;p_OD1;c_o_f_r_g                                                                                 | 0           | 0           | 0          | 0          | 0          | 0          | 0          |
| k_Bacteria;p_OD1;c_ABY1;o_f_r_g                                                                            | 0           | 0           | 0          | 0          | 0          | 1.32E-05   | 0          |
| k_Bacteria;p_OD1;c_SM2F11;o_f_r_g                                                                          | 0           | 0           | 0          | 0          | 0          | 0          | 0          |
| k_Bacteria;p_OD1;c_ZB2;o_f_r_g                                                                             | 0           | 0           | 0          | 4.42E-05   | 5.98E-05   | 3.97E-05   | 0          |
| k_Bacteria;p_OP8;c_OP8_1;o_HMMVPog-54;f_r_g                                                                | 0           | 0           | 0          | 0          | 5.98E-05   | 0          | 0          |
| k_Bacteria;p_Plantomyces;c_OM190;o_CL500-15;f_r_g                                                          | 0           | 0           | 2.71E-05   | 0.00013255 | 0          | 2.65E-05   | 3.06E-05   |
| k_Bacteria;p_Plantomyces;c_OM190;o_agg27;f_r_g                                                             | 0           | 0           | 0.00043306 | 0.0022092  | 0.00062769 | 0.00054256 | 0.00091777 |
| k_Bacteria;p_Plantomyces;c_Phycisphaerae;o_Phycisphaerales;f_r_g                                           | 4.18E-05    | 2.85E-05    | 0.00039246 | 0.00296032 | 0.0005978  | 0.00041023 | 0.00107073 |
| k_Bacteria;p_Plantomyces;c_Phycisphaerae;o_Phycisphaerales;f_Phycisphaeraeae;g_r_g                         | 0           | 0           | 0          | 0          | 0          | 0          | 0          |
| k_Bacteria;p_Plantomyces;c_Plantomyces;o_Gemmatales;f_Gemmataceae;g_r_g                                    | 0           | 0           | 0          | 0          | 0          | 2.65E-05   | 0          |
| k_Bacteria;p_Plantomyces;c_Plantomyces;o_Gemmatales;f_Isosphaeraeae;g_r_g                                  | 0           | 0           | 0          | 0          | 0          | 2.65E-05   | 0          |
| k_Bacteria;p_Plantomyces;c_Plantomyces;o_Pirellulales;f_Pirellulaceae;g_r_g                                | 6.97E-05    | 0.00015667  | 0.00331565 | 0.0176883  | 0.00454328 | 0.00346712 | 0.00333456 |
| k_Bacteria;p_Plantomyces;c_Plantomyces;o_Pirellulales;f_Pirellulaceae;g_Plantomyces                        | 0           | 0           | 0          | 1.47E-05   | 0          | 0          | 0          |
| k_Bacteria;p_Plantomyces;c_Plantomyces;o_Pirellulales;f_Pirellulaceae;g_Rhodopirellula                     | 0           | 0           | 0          | 0          | 0          | 0          | 0          |
| k_Bacteria;p_Plantomyces;c_Plantomyces;o_Plantomycetiales;f_Plantomycetaceae;g_Plantomyces                 | 0           | 1.42E-05    | 5.41E-05   | 2.95E-05   | 0.0002989  | 0.00017203 | 3.06E-05   |
| k_Bacteria;p_Plantomyces;c_vadinHA49;o_f_r_g                                                               | 0           | 0           | 0          | 0          | 0          | 0          | 0          |
| k_Bacteria;p_Proteobacteria;c_Alphaproteobacteria;o_f_r_g                                                  | 0.00269035  | 0.00618128  | 0.01789098 | 0.01757047 | 0.03281923 | 0.03145553 | 0.05524963 |
| k_Bacteria;p_Proteobacteria;c_Alphaproteobacteria;o_BD7-3f_r_g                                             | 0.0001394   | 5.70E-05    | 0          | 2.95E-05   | 5.98E-05   | 0          | 0          |
| k_Bacteria;p_Proteobacteria;c_Alphaproteobacteria;o_Caulobacterales;f_Caulobacteraceae;g_r_g               | 0           | 0           | 0          | 0          | 0          | 1.32E-05   | 0          |
| k_Bacteria;p_Proteobacteria;c_Alphaproteobacteria;o_Caulobacterales;f_Caulobacteraceae;g_Brevundimonas     | 0           | 0           | 0          | 0          | 0          | 0          | 0          |
| k_Bacteria;p_Proteobacteria;c_Alphaproteobacteria;o_Caulobacterales;f_Caulobacteraceae;g_Mycoplana         | 0           | 0           | 0          | 0          | 0          | 0          | 0          |
| k_Bacteria;p_Proteobacteria;c_Alphaproteobacteria;o_Caulobacterales;f_Caulobacteraceae;g_Phenylobacterium  | 2.79E-05    | 5.70E-05    | 0          | 0          | 5.98E-05   | 0          | 0          |
| k_Bacteria;p_Proteobacteria;c_Alphaproteobacteria;o_Ellin329;f_r_g                                         | 0           | 0           | 0          | 2.95E-05   | 2.99E-05   | 0          | 0          |
| k_Bacteria;p_Proteobacteria;c_Alphaproteobacteria;o_Kiloniellales;f_r_g                                    | 0           | 0           | 0          | 0.0001031  | 0.0002989  | 0.0003176  | 9.18E-05   |
| k_Bacteria;p_Proteobacteria;c_Alphaproteobacteria;o_Kiloniellales;f_Kiloniellaceae;g_r_g                   | 2.79E-05    | 4.27E-05    | 0.00232772 | 0.00078058 | 0.00038857 | 0.0003176  | 0.0011931  |
| k_Bacteria;p_Proteobacteria;c_Alphaproteobacteria;o_Kordiimonadales;f_Kordiimonadaceae;g_r_g               | 0           | 0           | 0          | 0          | 0          | 0          | 0          |
| k_Bacteria;p_Proteobacteria;c_Alphaproteobacteria;o_Rhizobiales;f_r_g                                      | 5.58E-05    | 0.00014243  | 0.00050073 | 0.00011782 | 0.0002989  | 0.00014557 | 0.00012237 |
| k_Bacteria;p_Proteobacteria;c_Alphaproteobacteria;o_Rhizobiales;f_Aurantimonadaceae;g_Martella             | 0           | 0           | 0          | 1.47E-05   | 0          | 0          | 0          |
| k_Bacteria;p_Proteobacteria;c_Alphaproteobacteria;o_Rhizobiales;f_Bejerinckiaceae;g_Chelatococcus          | 0           | 0           | 0          | 0          | 0          | 0          | 0          |
| k_Bacteria;p_Proteobacteria;c_Alphaproteobacteria;o_Rhizobiales;f_Bradyrhizobiaceae;g_r_g                  | 1.39E-05    | 0           | 0          | 0          | 0          | 1.32E-05   | 0          |
| k_Bacteria;p_Proteobacteria;c_Alphaproteobacteria;o_Rhizobiales;f_Bradyrhizobiaceae;g_Balnearmonas         | 0           | 0           | 0          | 0          | 0          | 0          | 0          |
| k_Bacteria;p_Proteobacteria;c_Alphaproteobacteria;o_Rhizobiales;f_Bradyrhizobiaceae;g_Pseudomonas          | 0           | 0           | 0          | 0          | 0          | 0          | 0          |
| k_Bacteria;p_Proteobacteria;c_Alphaproteobacteria;o_Rhizobiales;f_Coehasibacteraceae;g_Coehasibacter       | 0           | 0           | 0          | 0          | 0          | 0          | 0          |
| k_Bacteria;p_Proteobacteria;c_Alphaproteobacteria;o_Rhizobiales;f_Hyphomicrobiaceae;g_r_g                  | 0           | 0           | 4.06E-05   | 0.00022092 | 0.00014945 | 7.94E-05   | 9.18E-05   |
| k_Bacteria;p_Proteobacteria;c_Alphaproteobacteria;o_Rhizobiales;f_Hyphomicrobiaceae;g_Devosia              | 0.0001394   | 5.70E-05    | 0          | 1.47E-05   | 2.99E-05   | 3.97E-05   | 0          |
| k_Bacteria;p_Proteobacteria;c_Alphaproteobacteria;o_Rhizobiales;f_Hyphomicrobiaceae;g_Rhodoplanes          | 0           | 0           | 0          | 0          | 0          | 0          | 0          |
| k_Bacteria;p_Proteobacteria;c_Alphaproteobacteria;o_Rhizobiales;f_Methylbacteriaceae;g_r_g                 | 0           | 0           | 0          | 0          | 0          | 0          | 0          |
| k_Bacteria;p_Proteobacteria;c_Alphaproteobacteria;o_Rhizobiales;f_Methylbacteriaceae;g_Methylbacterium     | 0           | 2.85E-05    | 0          | 0          | 0          | 0          | 0          |
| k_Bacteria;p_Proteobacteria;c_Alphaproteobacteria;o_Rhizobiales;f_Methylcystaceae;g_r_g                    | 0           | 0           | 0          | 0          | 0          | 0          | 6.12E-05   |
| k_Bacteria;p_Proteobacteria;c_Alphaproteobacteria;o_Rhizobiales;f_Methylcystaceae;g_Methylsinus            | 0           | 0           | 0          | 0          | 0          | 0          | 3.06E-05   |
| k_Bacteria;p_Proteobacteria;c_Alphaproteobacteria;o_Rhizobiales;f_Methylcystaceae;g_Pleomorphonas          | 0           | 0           | 0          | 0          | 0          | 0          | 0          |
| k_Bacteria;p_Proteobacteria;c_Alphaproteobacteria;o_Rhizobiales;f_Phyllobacteriaceae;g_r_g                 | 1.39E-05    | 0           | 0          | 0.00017674 | 0.00014945 | 0          | 0          |
| k_Bacteria;p_Proteobacteria;c_Alphaproteobacteria;o_Rhizobiales;f_Phyllobacteriaceae;g_Chelativorans       | 0           | 0           | 0          | 0          | 0          | 0          | 0          |
| k_Bacteria;p_Proteobacteria;c_Alphaproteobacteria;o_Rhizobiales;f_Phyllobacteriaceae;g_Hoefflea            | 1.39E-05    | 7.12E-05    | 0          | 0          | 0          | 0          | 0          |
| k_Bacteria;p_Proteobacteria;c_Alphaproteobacteria;o_Rhizobiales;f_Phyllobacteriaceae;g_Mesorhizobium       | 0           | 0           | 0          | 0          | 0          | 0          | 0          |
| k_Bacteria;p_Proteobacteria;c_Alphaproteobacteria;o_Rhizobiales;f_Phyllobacteriaceae;g_Phyllobacterium     | 0           | 0           | 0          | 0          | 0          | 0          | 0          |
| k_Bacteria;p_Proteobacteria;c_Alphaproteobacteria;o_Rhizobiales;f_Rhizobiaceae;g_r_g                       | 0           | 0           | 0          | 0          | 0          | 0          | 0          |
| k_Bacteria;p_Proteobacteria;c_Alphaproteobacteria;o_Rhizobiales;f_Rhizobiaceae;g_Agrobacterium             | 0           | 0           | 0          | 0          | 0          | 2.65E-05   | 0          |
| k_Bacteria;p_Proteobacteria;c_Alphaproteobacteria;o_Rhizobiales;f_Rhizobiaceae;g_Rhizobium                 | 0           | 0           | 0          | 0          | 0          | 0          | 0          |
| k_Bacteria;p_Proteobacteria;c_Alphaproteobacteria;o_Rhizobiales;f_Rhizobiaceae;g_Shinella                  | 0           | 0           | 0          | 0          | 0          | 0          | 0          |
| k_Bacteria;p_Proteobacteria;c_Alphaproteobacteria;o_Rhizobiales;f_Xanthobacteraceae;g_Xanthobacter         | 0           | 0           | 0          | 0          | 0          | 0          | 0          |
| k_Bacteria;p_Proteobacteria;c_Alphaproteobacteria;o_Rhodobacteriales;f_Hyphomonadaceae;g_r_g               | 4.18E-05    | 8.55E-05    | 0.00104206 | 0.00231229 | 0.00322812 | 0.00352006 | 0.00379344 |
| k_Bacteria;p_Proteobacteria;c_Alphaproteobacteria;o_Rhodobacteriales;f_Hyphomonadaceae;g_Maricaulis        | 2.79E-05    | 0           | 0          | 4.27E-05   | 0          | 0          | 0          |
| k_Bacteria;p_Proteobacteria;c_Alphaproteobacteria;o_Rhodobacteriales;f_Hyphomonadaceae;g_Robiginitomaculum | 0           | 0           | 0          | 0          | 0          | 3.97E-05   | 0          |
| k_Bacteria;p_Proteobacteria;c_Alphaproteobacteria;o_Rhodobacteriales;f_Rhodobacteriaceae;g_r_g             | 0.0532772   | 0.0684356   | 0.09063227 | 0.09568765 | 0.09433286 | 0.08384612 | 0.06555923 |
| k_Bacteria;p_Proteobacteria;c_Alphaproteobacteria;o_Rhodobacteriales;f_Rhodobacteriaceae;g_Amaricoccus     | 0           | 0           | 0          | 0          | 0          | 0          | 0          |
| k_Bacteria;p_Proteobacteria;c_Alphaproteobacteria;o_Rhodobacteriales;f_Rhodobacteriaceae;g_Anarospora      | 1.39E-05    | 0           | 0          | 5.89E-05   | 0.00062769 | 0.000397   | 0          |
| k_Bacteria;p_Proteobacteria;c_Alphaproteobacteria;o_Rhodobacteriales;f_Rhodobacteriaceae;g_Celeribacter    | 0           | 0           | 1.35E-05   | 8.84E-05   | 0          | 0          | 0          |
| k_Bacteria;p_Proteobacteria;c_Alphaproteobacteria;o_Rhodobacteriales;f_Rhodobacteriaceae;g_Dinoroseobacter | 9.76E-05    | 0.00051273  | 0          | 0.00011782 | 0.00047824 | 0.00033083 | 6.12E-05   |
| k_Bacteria;p_Proteobacteria;c_Alphaproteobacteria;o_Rhodobacteriales;f_Rhodobacteriaceae;g_Donghicola      | 0           | 1.42E-05    | 0          | 0          | 0          | 0          | 0          |
| k_Bacteria;p_Proteobacteria;c_Alphaproteobacteria;o_Rhodobacteriales;f_Rhodobacteriaceae;g_Janaschia       | 1.39E-05    | 0           | 0          | 4.42E-05   | 0          | 0          | 0          |
| k_Bacteria;p_Proteobacteria;c_Alphaproteobacteria;o_Rhodobacteriales;f_Rhodobacteriaceae;g_Loktanelia      | 0.00072486  | 0.0007691   | 0.00010827 | 0.0001031  | 0.00032879 | 0.00021173 | 0.00027533 |
| k_Bacteria;p_Proteobacteria;c_Alphaproteobacteria;o_Rhodobacteriales;f_Rhodobacteriaceae;g_Maribius        | 0           | 0           | 0          | 2.95E-05   | 0          | 0          | 0          |
| k_Bacteria;p_Proteobacteria;c_Alphaproteobacteria;o_Rhodobacteriales;f_Rhodobacteriaceae;g_Marivita        | 0           | 0           | 0          | 0          | 2.99E-05   | 3.97E-05   | 0          |
| k_Bacteria;p_Proteobacteria;c_Alphaproteobacteria;o_Rhodobacteriales;f_Rhodobacteriaceae;g_Nautella        | 0           | 0           | 0          | 0          | 0          | 0          | 0          |

| Taxon                                                                                                                | 2028                      |            | 2029        |            | 1184       |            | 1196       |            | 1245  |       | 1246  |       | 2019  |       |
|----------------------------------------------------------------------------------------------------------------------|---------------------------|------------|-------------|------------|------------|------------|------------|------------|-------|-------|-------|-------|-------|-------|
|                                                                                                                      | Copepod Genus Centropages |            | Centropages |            | Water      |            | Water      |            | Water |       | Water |       | Water |       |
|                                                                                                                      | Type of sample            | Starved    | Starved     | Water      | Water      | Water      | Water      | Water      | Water | Water | Water | Water | Water | Water |
| k_Bacteria;p__Proteobacteria;c__Alphaproteobacteria;o__Rhodobacterales;f__Rhodobacteraceae;g__Oceanicola             |                           | 0          | 0           | 0          | 1.47E-05   | 0          | 0          | 0          | 0     | 0     | 0     | 0     | 0     | 0     |
| k_Bacteria;p__Proteobacteria;c__Alphaproteobacteria;o__Rhodobacterales;f__Rhodobacteraceae;g__Octadecabacter         |                           | 0.02702891 | 0.05687062  | 0.03563309 | 0.06285899 | 0.21658297 | 0.15785991 | 0.0989048  |       |       |       |       |       |       |
| k_Bacteria;p__Proteobacteria;c__Alphaproteobacteria;o__Rhodobacterales;f__Rhodobacteraceae;g__Paracoccus             |                           | 1.39E-05   | 0           | 0          | 0          | 0          | 1.32E-05   | 0          |       |       |       |       |       |       |
| k_Bacteria;p__Proteobacteria;c__Alphaproteobacteria;o__Rhodobacterales;f__Rhodobacteraceae;g__Pseudobacter           |                           | 0.00165881 | 0.00132456  | 1.35E-05   | 2.95E-05   | 8.97E-05   | 0.00010587 | 0          |       |       |       |       |       |       |
| k_Bacteria;p__Proteobacteria;c__Alphaproteobacteria;o__Rhodobacterales;f__Rhodobacteraceae;g__Pseudoroseobacter      |                           | 0.00022303 | 9.97E-05    | 0          | 4.42E-05   | 0          | 0          | 0          |       |       |       |       |       |       |
| k_Bacteria;p__Proteobacteria;c__Alphaproteobacteria;o__Rhodobacterales;f__Rhodobacteraceae;g__Pseudoruegeria         |                           | 8.36E-05   | 0.00012818  | 0.0005278  | 0.00022092 | 0.00023912 | 0.0001191  | 0          |       |       |       |       |       |       |
| k_Bacteria;p__Proteobacteria;c__Alphaproteobacteria;o__Rhodobacterales;f__Rhodobacteraceae;g__Rhodobacter            |                           | 0          | 0           | 2.71E-05   | 0          | 8.97E-05   | 7.94E-05   | 0          |       |       |       |       |       |       |
| k_Bacteria;p__Proteobacteria;c__Alphaproteobacteria;o__Rhodobacterales;f__Rhodobacteraceae;g__Roseicyclus            |                           | 0          | 0           | 0          | 0          | 0          | 0          | 0          |       |       |       |       |       |       |
| k_Bacteria;p__Proteobacteria;c__Alphaproteobacteria;o__Rhodobacterales;f__Rhodobacteraceae;g__Roseobacter            |                           | 0          | 0           | 0          | 1.47E-05   | 0          | 0          | 0          |       |       |       |       |       |       |
| k_Bacteria;p__Proteobacteria;c__Alphaproteobacteria;o__Rhodobacterales;f__Rhodobacteraceae;g__Rubellimicrobium       |                           | 0          | 0           | 0          | 0          | 0          | 0          | 0          |       |       |       |       |       |       |
| k_Bacteria;p__Proteobacteria;c__Alphaproteobacteria;o__Rhodobacterales;f__Rhodobacteraceae;g__Shimia                 |                           | 0          | 0           | 0          | 0          | 0          | 0          | 0          |       |       |       |       |       |       |
| k_Bacteria;p__Proteobacteria;c__Alphaproteobacteria;o__Rhodobacterales;f__Rhodobacteraceae;g__Sulfitobacter          |                           | 0.00182609 | 0.00457187  | 0          | 0          | 0          | 0          | 3.06E-05   |       |       |       |       |       |       |
| k_Bacteria;p__Proteobacteria;c__Alphaproteobacteria;o__Rhodobacterales;f__Rhodobacteraceae;g__Thalassobacter         |                           | 0          | 0           | 1.35E-05   | 1.47E-05   | 0          | 0          | 6.12E-05   |       |       |       |       |       |       |
| k_Bacteria;p__Proteobacteria;c__Alphaproteobacteria;o__Rhodobacterales;f__Rhodobacteraceae;g__Thalassobius           |                           | 0.00027879 | 0.00065516  | 0          | 0          | 0.00071736 | 0.00046317 | 9.18E-05   |       |       |       |       |       |       |
| k_Bacteria;p__Proteobacteria;c__Alphaproteobacteria;o__Rhodobacterales;f__Rhodobacteraceae;g__Tropicibacter          |                           | 6.97E-05   | 5.70E-05    | 0          | 0          | 0          | 0          | 0          |       |       |       |       |       |       |
| k_Bacteria;p__Proteobacteria;c__Alphaproteobacteria;o__Rhodospirillales;f__g__                                       |                           | 0          | 0           | 0          | 0          | 0          | 0          | 0          |       |       |       |       |       |       |
| k_Bacteria;p__Proteobacteria;c__Alphaproteobacteria;o__Rhodospirillales;f__Acetobacteraceae;g__                      |                           | 0          | 0           | 0          | 0          | 0          | 0          | 0          |       |       |       |       |       |       |
| k_Bacteria;p__Proteobacteria;c__Alphaproteobacteria;o__Rhodospirillales;f__Acetobacteraceae;g__Roseococcus           |                           | 0          | 0           | 0          | 0          | 0          | 0          | 0          |       |       |       |       |       |       |
| k_Bacteria;p__Proteobacteria;c__Alphaproteobacteria;o__Rhodospirillales;f__Rhodospirillaceae;g__                     |                           | 0.00204912 | 0.00484248  | 0.00128566 | 0.00128133 | 0.0020923  | 0.00187913 | 0.00351811 |       |       |       |       |       |       |
| k_Bacteria;p__Proteobacteria;c__Alphaproteobacteria;o__Rhodospirillales;f__Rhodospirillaceae;g__Skermanella          |                           | 0          | 0           | 0          | 0          | 0          | 0          | 0          |       |       |       |       |       |       |
| k_Bacteria;p__Proteobacteria;c__Alphaproteobacteria;o__Rickettsiales;f__g__                                          |                           | 0.00054364 | 0.00069789  | 0.00320738 | 0.00334325 | 0.00080703 | 0.0011116  | 0.00403818 |       |       |       |       |       |       |
| k_Bacteria;p__Proteobacteria;c__Alphaproteobacteria;o__Rickettsiales;f__AEGEAN_112;g__                               |                           | 2.79E-05   | 0           | 4.06E-05   | 5.89E-05   | 5.98E-05   | 0          | 0          |       |       |       |       |       |       |
| k_Bacteria;p__Proteobacteria;c__Alphaproteobacteria;o__Rickettsiales;f__Pelagibacteraceae;g__                        |                           | 0.01201595 | 0.02441178  | 0.25584637 | 0.35207223 | 0.11223697 | 0.16365609 | 0.33048825 |       |       |       |       |       |       |
| k_Bacteria;p__Proteobacteria;c__Alphaproteobacteria;o__Rickettsiales;f__Rickettsiaceae;g__                           |                           | 0          | 0           | 4.06E-05   | 2.95E-05   | 0.00014945 | 7.94E-05   | 0.00012237 |       |       |       |       |       |       |
| k_Bacteria;p__Proteobacteria;c__Alphaproteobacteria;o__Rickettsiales;f__mitochondria;g__                             |                           | 0          | 0           | 0          | 7.36E-05   | 0          | 1.32E-05   | 0          |       |       |       |       |       |       |
| k_Bacteria;p__Proteobacteria;c__Alphaproteobacteria;o__Rickettsiales;f__mitochondria;g__Carludovicia                 |                           | 0          | 0           | 0          | 0          | 0          | 0          | 0          |       |       |       |       |       |       |
| k_Bacteria;p__Proteobacteria;c__Alphaproteobacteria;o__Rickettsiales;f__mitochondria;g__Citrullus                    |                           | 0          | 0           | 0          | 0          | 0          | 0          | 0          |       |       |       |       |       |       |
| k_Bacteria;p__Proteobacteria;c__Alphaproteobacteria;o__Rickettsiales;f__mitochondria;g__Lupinus                      |                           | 0          | 0           | 0          | 0          | 0          | 0          | 0          |       |       |       |       |       |       |
| k_Bacteria;p__Proteobacteria;c__Alphaproteobacteria;o__Rickettsiales;f__mitochondria;g__Nageia                       |                           | 0          | 0           | 0          | 0          | 0          | 0          | 0          |       |       |       |       |       |       |
| k_Bacteria;p__Proteobacteria;c__Alphaproteobacteria;o__Rickettsiales;f__mitochondria;g__Nelumbo                      |                           | 0          | 0           | 0          | 0          | 0          | 0          | 0          |       |       |       |       |       |       |
| k_Bacteria;p__Proteobacteria;c__Alphaproteobacteria;o__Rickettsiales;f__mitochondria;g__Oenothera                    |                           | 0          | 0           | 0          | 0          | 0          | 0          | 0          |       |       |       |       |       |       |
| k_Bacteria;p__Proteobacteria;c__Alphaproteobacteria;o__Rickettsiales;f__mitochondria;g__Phyllocladus                 |                           | 0          | 0           | 0          | 0          | 0          | 0          | 0          |       |       |       |       |       |       |
| k_Bacteria;p__Proteobacteria;c__Alphaproteobacteria;o__Rickettsiales;f__mitochondria;g__Zea                          |                           | 0          | 0           | 4.06E-05   | 0          | 0          | 0          | 0          |       |       |       |       |       |       |
| k_Bacteria;p__Proteobacteria;c__Alphaproteobacteria;o__Sphingomonadales;f__g__                                       |                           | 1.39E-05   | 1.42E-05    | 0          | 1.47E-05   | 0.00011956 | 0          | 3.06E-05   |       |       |       |       |       |       |
| k_Bacteria;p__Proteobacteria;c__Alphaproteobacteria;o__Sphingomonadales;f__Erythrobracteraeae;g__                    |                           | 0          | 0           | 0          | 1.47E-05   | 2.99E-05   | 6.62E-05   | 0          |       |       |       |       |       |       |
| k_Bacteria;p__Proteobacteria;c__Alphaproteobacteria;o__Sphingomonadales;f__Erythrobracteraeae;g__Altererythrobracter |                           | 0          | 0           | 0          | 0          | 0          | 3.97E-05   | 0          |       |       |       |       |       |       |
| k_Bacteria;p__Proteobacteria;c__Alphaproteobacteria;o__Sphingomonadales;f__Erythrobracteraeae;g__Erythrobracter      |                           | 0          | 0           | 0          | 0          | 0          | 2.65E-05   | 0          |       |       |       |       |       |       |
| k_Bacteria;p__Proteobacteria;c__Alphaproteobacteria;o__Sphingomonadales;f__Erythrobracteraeae;g__Lutibacterium       |                           | 0          | 0           | 0          | 0          | 0          | 3.97E-05   | 0          |       |       |       |       |       |       |
| k_Bacteria;p__Proteobacteria;c__Alphaproteobacteria;o__Sphingomonadales;f__Sphingomonadaeae;g__                      |                           | 2.79E-05   | 1.42E-05    | 2.71E-05   | 0          | 2.99E-05   | 5.29E-05   | 0          |       |       |       |       |       |       |
| k_Bacteria;p__Proteobacteria;c__Alphaproteobacteria;o__Sphingomonadales;f__Sphingomonadaeae;g__Kaistobacter          |                           | 0          | 0           | 0          | 0          | 0          | 0          | 0          |       |       |       |       |       |       |
| k_Bacteria;p__Proteobacteria;c__Alphaproteobacteria;o__Sphingomonadales;f__Sphingomonadaeae;g__Novosphingobium       |                           | 0          | 0           | 0          | 0          | 0          | 0          | 0          |       |       |       |       |       |       |
| k_Bacteria;p__Proteobacteria;c__Alphaproteobacteria;o__Sphingomonadales;f__Sphingomonadaeae;g__Sphingobium           |                           | 0          | 0           | 1.35E-05   | 0          | 0          | 0          | 0          |       |       |       |       |       |       |
| k_Bacteria;p__Proteobacteria;c__Alphaproteobacteria;o__Sphingomonadales;f__Sphingomonadaeae;g__Sphingomonas          |                           | 2.79E-05   | 1.42E-05    | 4.06E-05   | 0          | 2.99E-05   | 3.97E-05   | 0          |       |       |       |       |       |       |
| k_Bacteria;p__Proteobacteria;c__Alphaproteobacteria;o__Sphingomonadales;f__Sphingomonadaeae;g__Sphingopyxis          |                           | 0          | 0           | 0          | 0          | 0          | 0          | 0          |       |       |       |       |       |       |
| k_Bacteria;p__Proteobacteria;c__Alphaproteobacteria;o__Sphingomonadales;f__Sphingomonadaeae;g__Zymomonas             |                           | 0          | 0           | 0          | 0          | 0          | 0          | 0          |       |       |       |       |       |       |
| k_Bacteria;p__Proteobacteria;c__Betaproteobacteria;o__f__g__                                                         |                           | 0.00051577 | 0.00156668  | 0.0004872  | 0.00058912 | 0.00215208 | 0.00228936 | 0.0027533  |       |       |       |       |       |       |
| k_Bacteria;p__Proteobacteria;c__Betaproteobacteria;o__Burkholderiales;Comamonadaeae;g__                              |                           | 0          | 1.42E-05    | 1.35E-05   | 4.42E-05   | 0.00056791 | 0.00037053 | 0.00024474 |       |       |       |       |       |       |
| k_Bacteria;p__Proteobacteria;c__Betaproteobacteria;o__Burkholderiales;f__g__                                         |                           | 0          | 0           | 0          | 0          | 0          | 0          | 0          |       |       |       |       |       |       |
| k_Bacteria;p__Proteobacteria;c__Betaproteobacteria;o__Burkholderiales;f__Alcaligenaceae;g__                          |                           | 0          | 0           | 0          | 0          | 5.98E-05   | 2.65E-05   | 0          |       |       |       |       |       |       |
| k_Bacteria;p__Proteobacteria;c__Betaproteobacteria;o__Burkholderiales;f__Alcaligenaceae;g__Achromobacter             |                           | 0          | 0           | 0          | 0          | 0          | 0          | 0          |       |       |       |       |       |       |
| k_Bacteria;p__Proteobacteria;c__Betaproteobacteria;o__Burkholderiales;f__Alcaligenaceae;g__Sutterella                |                           | 0          | 0           | 0          | 0          | 5.98E-05   | 2.65E-05   | 0          |       |       |       |       |       |       |
| k_Bacteria;p__Proteobacteria;c__Betaproteobacteria;o__Burkholderiales;f__Burkholderiaceae;g__                        |                           | 0          | 0           | 0          | 0          | 0          | 0          | 0          |       |       |       |       |       |       |
| k_Bacteria;p__Proteobacteria;c__Betaproteobacteria;o__Burkholderiales;f__Burkholderiaceae;g__Burkholderia            |                           | 0          | 0           | 0          | 0          | 0          | 0          | 0          |       |       |       |       |       |       |
| k_Bacteria;p__Proteobacteria;c__Betaproteobacteria;o__Burkholderiales;f__Burkholderiaceae;g__Lautropia               |                           | 0          | 0           | 0          | 0          | 0          | 0          | 0          |       |       |       |       |       |       |
| k_Bacteria;p__Proteobacteria;c__Betaproteobacteria;o__Burkholderiales;f__Comamonadaeae;g__Acidovorax                 |                           | 0          | 0           | 0          | 0          | 0          | 0          | 0          |       |       |       |       |       |       |
| k_Bacteria;p__Proteobacteria;c__Betaproteobacteria;o__Burkholderiales;f__Comamonadaeae;g__Comamonas                  |                           | 0          | 0           | 0          | 0          | 2.99E-05   | 0          | 0          |       |       |       |       |       |       |
| k_Bacteria;p__Proteobacteria;c__Betaproteobacteria;o__Burkholderiales;f__Comamonadaeae;g__Curlvibacter               |                           | 0          | 0           | 1.35E-05   | 0          | 0          | 0          | 0          |       |       |       |       |       |       |
| k_Bacteria;p__Proteobacteria;c__Betaproteobacteria;o__Burkholderiales;f__Comamonadaeae;g__Delftia                    |                           | 0          | 0           | 0          | 0          | 0          | 0          | 0          |       |       |       |       |       |       |
| k_Bacteria;p__Proteobacteria;c__Betaproteobacteria;o__Burkholderiales;f__Comamonadaeae;g__Hydrogenophaga             |                           | 0          | 0           | 0          | 0          | 5.98E-05   | 1.32E-05   | 0          |       |       |       |       |       |       |
| k_Bacteria;p__Proteobacteria;c__Betaproteobacteria;o__Burkholderiales;f__Comamonadaeae;g__Leptothrix                 |                           | 0          | 0           | 0          | 0          | 0          | 0          | 0          |       |       |       |       |       |       |
| k_Bacteria;p__Proteobacteria;c__Betaproteobacteria;o__Burkholderiales;f__Comamonadaeae;g__Limnibacterium             |                           | 0          | 0           | 0          | 0          | 0          | 3.97E-05   | 0          |       |       |       |       |       |       |
| k_Bacteria;p__Proteobacteria;c__Betaproteobacteria;o__Burkholderiales;f__Comamonadaeae;g__Methylobium                |                           | 0          | 2.85E-05    | 0          | 0          | 0          | 0          | 0          |       |       |       |       |       |       |
| k_Bacteria;p__Proteobacteria;c__Betaproteobacteria;o__Burkholderiales;f__Comamonadaeae;g__Polaromonas                |                           | 0          | 0           | 0          | 0          | 0          | 2.99E-05   | 0          |       |       |       |       |       |       |
| k_Bacteria;p__Proteobacteria;c__Betaproteobacteria;o__Burkholderiales;f__Comamonadaeae;g__RS62                       |                           | 2.79E-05   | 0.00015667  | 2.71E-05   | 1.47E-05   | 0.00176351 | 0.00144243 | 0.00015296 |       |       |       |       |       |       |
| k_Bacteria;p__Proteobacteria;c__Betaproteobacteria;o__Burkholderiales;f__Comamonadaeae;g__Rhodoferrax                |                           | 0          | 0           | 0          | 0          | 0          | 0          | 0          |       |       |       |       |       |       |
| k_Bacteria;p__Proteobacteria;c__Betaproteobacteria;o__Burkholderiales;f__Comamonadaeae;g__Roseateles                 |                           | 0          | 0           | 0          | 0          | 0          | 0          | 0          |       |       |       |       |       |       |
| k_Bacteria;p__Proteobacteria;c__Betaproteobacteria;o__Burkholderiales;f__Comamonadaeae;g__Schlegelella               |                           | 0          | 0           | 0          | 0          | 0          | 0          | 0          |       |       |       |       |       |       |
| k_Bacteria;p__Proteobacteria;c__Betaproteobacteria;o__Burkholderiales;f__Comamonadaeae;g__Tepidimonas                |                           | 0          | 0           | 0          | 0          | 0          | 0          | 0          |       |       |       |       |       |       |
| k_Bacteria;p__Proteobacteria;c__Betaproteobacteria;o__Burkholderiales;f__Comamonadaeae;g__Variovorax                 |                           | 0          | 0           | 0          | 0          | 0          | 0          | 0          |       |       |       |       |       |       |
| k_Bacteria;p__Proteobacteria;c__Betaproteobacteria;o__Burkholderiales;f__Oxalobacteraceae;g__                        |                           | 0          | 0           | 0.00010827 | 1.47E-05   | 0.00023912 | 9.26E-05   | 3.06E-05   |       |       |       |       |       |       |
| k_Bacteria;p__Proteobacteria;c__Betaproteobacteria;o__Burkholderiales;f__Oxalobacteraceae;g__Cupriavidus             |                           | 0          | 0           | 0          | 0          | 0          | 0          | 0          |       |       |       |       |       |       |
| k_Bacteria;p__Proteobacteria;c__Betaproteobacteria;o__Burkholderiales;f__Oxalobacteraceae;g__Herbaspirillum          |                           | 1.39E-05   | 0           | 0          | 0          | 0          | 0          | 0          |       |       |       |       |       |       |
| k_Bacteria;p__Proteobacteria;c__Betaproteobacteria;o__Burkholderiales;f__Oxalobacteraceae;g__Janthinobacterium       |                           | 0          | 0           | 0          | 0          | 0          | 0          | 7.94E-05   |       |       |       |       |       |       |
| k_Bacteria;p__Proteobacteria;c__Betaproteobacteria;o__Burkholderiales;f__Oxalobacteraceae;g__Massilia                |                           | 0          | 0           | 1.35E-05   | 0          | 0          | 0          | 0          |       |       |       |       |       |       |



Taxon

| Taxon                                                                                                                 | 2028                            | 2029                   | 1184                   | 1196           | 1245           | 1246           | 2019           |
|-----------------------------------------------------------------------------------------------------------------------|---------------------------------|------------------------|------------------------|----------------|----------------|----------------|----------------|
|                                                                                                                       | Copepod genus<br>Type of sample | Centropages<br>Starved | Centropages<br>Starved | Water<br>Water | Water<br>Water | Water<br>Water | Water<br>Water |
| k_Bacteria;p__Proteobacteria;c__Betaproteobacteria;o__Burkholderiales;f__Oxalobacteraceae;g__Polynucleobacter         |                                 | 0                      | 0                      | 5.41E-05       | 0              | 2.99E-05       | 2.65E-05       |
| k_Bacteria;p__Proteobacteria;c__Betaproteobacteria;o__Burkholderiales;f__Oxalobacteraceae;g__Ralstonia                |                                 | 0                      | 0                      | 0              | 0              | 0              | 0              |
| k_Bacteria;p__Proteobacteria;c__Betaproteobacteria;o__Ellin6067;f__g__                                                |                                 | 0                      | 0                      | 0              | 0              | 0              | 0              |
| k_Bacteria;p__Proteobacteria;c__Betaproteobacteria;o__Methylophilales;f__Methylophilaceae;g__                         | 0.00029273                      | 0.00075486             | 0.00208412             | 0.0024743      | 0.0035868      | 0.00489632     | 0.00541483     |
| k_Bacteria;p__Proteobacteria;c__Betaproteobacteria;o__Methylophilales;f__Methylophilaceae;g__Methylotenera            |                                 | 0                      | 2.71E-05               | 0              | 8.97E-05       | 0.00013233     | 3.06E-05       |
| k_Bacteria;p__Proteobacteria;c__Betaproteobacteria;o__Neisseriales;f__Neisseriaceae;g__                               |                                 | 0                      | 0                      | 0              | 0              | 0              | 0              |
| k_Bacteria;p__Proteobacteria;c__Betaproteobacteria;o__Neisseriales;f__Neisseriaceae;g__Kingella                       |                                 | 0                      | 0                      | 0              | 0              | 0              | 0              |
| k_Bacteria;p__Proteobacteria;c__Betaproteobacteria;o__Neisseriales;f__Neisseriaceae;g__Microvirgula                   |                                 | 0                      | 0                      | 0              | 0              | 2.65E-05       | 0              |
| k_Bacteria;p__Proteobacteria;c__Betaproteobacteria;o__Neisseriales;f__Neisseriaceae;g__Neisseria                      |                                 | 0                      | 0                      | 0              | 0              | 0              | 0              |
| k_Bacteria;p__Proteobacteria;c__Betaproteobacteria;o__Nitrosomonadales;f__Nitrosomonadaceae;g__                       |                                 | 0                      | 1.35E-05               | 0              | 0              | 0              | 3.06E-05       |
| k_Bacteria;p__Proteobacteria;c__Betaproteobacteria;o__Procabacteriales;f__Procabacteriaceae;g__                       |                                 | 0                      | 0                      | 0              | 5.98E-05       | 0.00013233     | 0              |
| k_Bacteria;p__Proteobacteria;c__Betaproteobacteria;o__Rhodocyclales;f__Rhodocyclaceae;g__                             | 0.00269035                      | 0.00591067             | 0.00343745             | 0.00377036     | 0.0173362      | 0.01715034     | 0.00933064     |
| k_Bacteria;p__Proteobacteria;c__Betaproteobacteria;o__Rhodocyclales;f__Rhodocyclaceae;g__Dechloromonas                |                                 | 0                      | 0                      | 0              | 0              | 1.32E-05       | 0              |
| k_Bacteria;p__Proteobacteria;c__Betaproteobacteria;o__Rhodocyclales;f__Rhodocyclaceae;g__Hydrogenophilus              |                                 | 0                      | 0                      | 0              | 0              | 0              | 0              |
| k_Bacteria;p__Proteobacteria;c__Betaproteobacteria;o__Rhodocyclales;f__Rhodocyclaceae;g__Methyloversatilis            |                                 | 0                      | 0                      | 0              | 0              | 0              | 0              |
| k_Bacteria;p__Proteobacteria;c__Betaproteobacteria;o__Rhodocyclales;f__Rhodocyclaceae;g__Propionivibrio               |                                 | 0                      | 0                      | 0              | 0              | 0              | 0              |
| k_Bacteria;p__Proteobacteria;c__Betaproteobacteria;o__Rhodocyclales;f__Rhodocyclaceae;g__Uliginosibacterium           |                                 | 0                      | 0                      | 0              | 0              | 0              | 0              |
| k_Bacteria;p__Proteobacteria;c__Betaproteobacteria;o__Rhodocyclales;f__Rhodocyclaceae;g__Zoogloea                     |                                 | 0                      | 0                      | 0              | 0              | 0              | 0              |
| k_Bacteria;p__Proteobacteria;c__Betaproteobacteria;o__SC1-84;f__g__                                                   |                                 | 0                      | 0                      | 0              | 0              | 0              | 0              |
| k_Bacteria;p__Proteobacteria;c__Betaproteobacteria;o__Tremblayales;f__g__                                             |                                 | 0                      | 0                      | 0              | 0              | 1.32E-05       | 0              |
| k_Bacteria;p__Proteobacteria;c__Deltaproteobacteria;o__f__g__                                                         |                                 | 0                      | 0                      | 0              | 0              | 3.97E-05       | 0              |
| k_Bacteria;p__Proteobacteria;c__Deltaproteobacteria;o__Bdellovibrionales;f__Bacteriovoracaceae;g__                    | 5.58E-05                        | 0.00012818             | 9.47E-05               | 0              | 2.99E-05       | 0              | 0              |
| k_Bacteria;p__Proteobacteria;c__Deltaproteobacteria;o__Bdellovibrionales;f__Bacteriovoracaceae;g__Bacteriovorax       | 1.39E-05                        | 7.12E-05               | 1.35E-05               | 1.47E-05       | 0              | 2.65E-05       | 0              |
| k_Bacteria;p__Proteobacteria;c__Deltaproteobacteria;o__Bdellovibrionales;f__Bdellovibrionaceae;g__Bdellovibrio        |                                 | 0                      | 0                      | 0              | 2.99E-05       | 0              | 0              |
| k_Bacteria;p__Proteobacteria;c__Deltaproteobacteria;o__Desulfarculales;f__Desulfarculaceae;g__                        |                                 | 0                      | 0                      | 1.47E-05       | 0              | 0              | 0              |
| k_Bacteria;p__Proteobacteria;c__Deltaproteobacteria;o__Desulfobacteriales;f__Desulfobacteraceae;g__                   |                                 | 0                      | 0                      | 0              | 5.98E-05       | 1.32E-05       | 0              |
| k_Bacteria;p__Proteobacteria;c__Deltaproteobacteria;o__Desulfobacteriales;f__Desulfobacteraceae;g__Desulfococcus      |                                 | 0                      | 0                      | 0              | 8.97E-05       | 0.0001191      | 0              |
| k_Bacteria;p__Proteobacteria;c__Deltaproteobacteria;o__Desulfobacteriales;f__Desulfobacteraceae;g__Desulfofrigigus    |                                 | 0                      | 0                      | 1.47E-05       | 0              | 0              | 0              |
| k_Bacteria;p__Proteobacteria;c__Deltaproteobacteria;o__Desulfobacteriales;f__Desulfobacteraceae;g__Desulfosarcina     |                                 | 0                      | 0                      | 1.47E-05       | 0              | 2.65E-05       | 0              |
| k_Bacteria;p__Proteobacteria;c__Deltaproteobacteria;o__Desulfobacteriales;f__Desulfobulbaceae;g__                     |                                 | 0                      | 0                      | 1.47E-05       | 5.98E-05       | 7.94E-05       | 0              |
| k_Bacteria;p__Proteobacteria;c__Deltaproteobacteria;o__Desulfobacteriales;f__Nitrospinae;g__Nitrospina                |                                 | 0                      | 0                      | 1.47E-05       | 0              | 0              | 0              |
| k_Bacteria;p__Proteobacteria;c__Deltaproteobacteria;o__Desulfobacteriales;f__Nitrospinae;g__Nitrospina                |                                 | 0                      | 0                      | 0              | 0              | 0              | 3.06E-05       |
| k_Bacteria;p__Proteobacteria;c__Deltaproteobacteria;o__Desulfobacteriales;f__Desulfobulbaceae;g__                     |                                 | 0                      | 0                      | 0              | 0              | 0              | 0              |
| k_Bacteria;p__Proteobacteria;c__Deltaproteobacteria;o__Desulfobacteriales;f__Desulfobulbaceae;g__Desulfobulbaceae     |                                 | 0                      | 0                      | 0              | 0              | 3.97E-05       | 0              |
| k_Bacteria;p__Proteobacteria;c__Deltaproteobacteria;o__Desulfobacteriales;f__Desulfobulbaceae;g__Desulfobulbaceae     |                                 | 0                      | 0                      | 0              | 5.98E-05       | 6.62E-05       | 0              |
| k_Bacteria;p__Proteobacteria;c__Deltaproteobacteria;o__Desulfuromonadales;f__Desulfuromonadaceae;g__Desulfuromusa     |                                 | 0                      | 0                      | 0              | 0              | 1.32E-05       | 0              |
| k_Bacteria;p__Proteobacteria;c__Deltaproteobacteria;o__FAC87;f__g__                                                   |                                 | 0                      | 0                      | 0              | 0              | 0              | 0              |
| k_Bacteria;p__Proteobacteria;c__Deltaproteobacteria;o__MIZ46;f__g__                                                   |                                 | 0                      | 0                      | 0              | 0              | 0              | 0              |
| k_Bacteria;p__Proteobacteria;c__Deltaproteobacteria;o__Myxococcales;f__g__                                            |                                 | 0                      | 1.42E-05               | 0              | 0.00014945     | 0              | 0              |
| k_Bacteria;p__Proteobacteria;c__Deltaproteobacteria;o__Myxococcales;f__0319-6G20;g__                                  |                                 | 0                      | 0                      | 0              | 0              | 0              | 0              |
| k_Bacteria;p__Proteobacteria;c__Deltaproteobacteria;o__Myxococcales;f__OM27;g__                                       |                                 | 0                      | 4.27E-05               | 0.00017593     | 0.00092786     | 0.00047824     | 0.0005161      |
| k_Bacteria;p__Proteobacteria;c__Deltaproteobacteria;o__N81-jf__g__                                                    |                                 | 0                      | 0                      | 1.35E-05       | 0              | 0              | 0              |
| k_Bacteria;p__Proteobacteria;c__Deltaproteobacteria;o__N81-jf__JT838;g__                                              |                                 | 0                      | 0                      | 0.00010827     | 0.00039766     | 0.00044835     | 0.00022497     |
| k_Bacteria;p__Proteobacteria;c__Deltaproteobacteria;o__PB19-f__g__                                                    |                                 | 0                      | 0                      | 5.41E-05       | 0.0002651      | 0              | 5.29E-05       |
| k_Bacteria;p__Proteobacteria;c__Deltaproteobacteria;o__Sva0853;f__g__                                                 |                                 | 0                      | 0                      | 0              | 0              | 0              | 0              |
| k_Bacteria;p__Proteobacteria;c__Deltaproteobacteria;o__Sva0853;f__S25_1238;g__                                        |                                 | 0                      | 0                      | 0              | 2.99E-05       | 1.32E-05       | 0              |
| k_Bacteria;p__Proteobacteria;c__Deltaproteobacteria;o__Sva0853;f__SAR324;g__                                          |                                 | 0                      | 0                      | 5.41E-05       | 1.47E-05       | 0              | 0              |
| k_Bacteria;p__Proteobacteria;c__Deltaproteobacteria;o__Syntrophobacteriales;f__Syntrophobacteraceae;g__               |                                 | 0                      | 0                      | 0              | 0              | 2.65E-05       | 0              |
| k_Bacteria;p__Proteobacteria;c__Epsilonproteobacteria;o__Campylobacteriales;f__Campylobacteraceae;g__Arcobacter       |                                 | 0                      | 8.55E-05               | 1.35E-05       | 0.00030929     | 0.00053802     | 0.0006352      |
| k_Bacteria;p__Proteobacteria;c__Epsilonproteobacteria;o__Campylobacteriales;f__Campylobacteraceae;g__Campylobacter    |                                 | 0                      | 0                      | 0              | 0              | 0              | 1.32E-05       |
| k_Bacteria;p__Proteobacteria;c__Epsilonproteobacteria;o__Campylobacteriales;f__Campylobacteraceae;g__Sulfurospirillum |                                 | 0                      | 0                      | 0              | 1.47E-05       | 5.98E-05       | 2.65E-05       |
| k_Bacteria;p__Proteobacteria;c__Epsilonproteobacteria;o__Campylobacteriales;f__Campylobacteraceae;g__                 |                                 | 0                      | 0                      | 0              | 0.00023565     | 0.00032879     | 0.00014557     |
| k_Bacteria;p__Proteobacteria;c__Epsilonproteobacteria;o__Campylobacteriales;f__Campylobacteraceae;g__Sulfurimonas     |                                 | 0                      | 0                      | 0              | 5.89E-05       | 0.00020923     | 7.94E-05       |
| k_Bacteria;p__Proteobacteria;c__Epsilonproteobacteria;o__Campylobacteriales;f__Campylobacteraceae;g__Wolinella        |                                 | 0                      | 0                      | 0              | 0              | 0              | 0              |
| k_Bacteria;p__Proteobacteria;c__Gammaproteobacteria;o__f__g__                                                         | 0.00015334                      | 0.00011394             | 2.71E-05               | 0.00013255     | 5.98E-05       | 0.0001191      | 0.0003977      |
| k_Bacteria;p__Proteobacteria;c__Gammaproteobacteria;o__Aeromonadales;f__Aeromonadaceae;g__                            |                                 | 0                      | 0                      | 0              | 0              | 0.00017934     | 0.00010587     |
| k_Bacteria;p__Proteobacteria;c__Gammaproteobacteria;o__Aeromonadales;f__Aeromonadaceae;g__Aeromonas                   |                                 | 0                      | 0                      | 0              | 0              | 0              | 3.97E-05       |
| k_Bacteria;p__Proteobacteria;c__Gammaproteobacteria;o__Aeromonadales;f__Aeromonadaceae;g__Tolunomas                   |                                 | 0                      | 0                      | 0              | 8.97E-05       | 9.26E-05       | 0              |
| k_Bacteria;p__Proteobacteria;c__Gammaproteobacteria;o__Alteromonadales;f__g__                                         | 2.79E-05                        | 0                      | 4.06E-05               | 8.84E-05       | 0.00035868     | 0.00021173     | 0.00027533     |
| k_Bacteria;p__Proteobacteria;c__Gammaproteobacteria;o__Alteromonadales;f__Alteromonadaceae;g__                        | 0.02712649                      | 0.0181308              | 6.77E-05               | 0.00016201     | 0.00020923     | 0.00013233     | 0.00116251     |
| k_Bacteria;p__Proteobacteria;c__Gammaproteobacteria;o__Alteromonadales;f__Alteromonadaceae;g__Alteromonas             | 0.01598874                      | 0.01008375             | 0                      | 0              | 0              | 1.32E-05       | 0.00520069     |
| k_Bacteria;p__Proteobacteria;c__Gammaproteobacteria;o__Alteromonadales;f__Alteromonadaceae;g__BD2-13                  |                                 | 0                      | 0                      | 0              | 0              | 2.65E-05       | 0              |
| k_Bacteria;p__Proteobacteria;c__Gammaproteobacteria;o__Alteromonadales;f__Alteromonadaceae;g__Candidatus Endobugula   |                                 | 0                      | 0                      | 2.95E-05       | 0              | 0              | 0              |
| k_Bacteria;p__Proteobacteria;c__Gammaproteobacteria;o__Alteromonadales;f__Alteromonadaceae;g__Cellvibrio              |                                 | 0                      | 0                      | 0              | 0              | 0              | 0              |
| k_Bacteria;p__Proteobacteria;c__Gammaproteobacteria;o__Alteromonadales;f__Alteromonadaceae;g__Glaciecloa              | 0.06741197                      | 0.16159631             | 0.00023007             | 0.0001031      | 0.0002989      | 0.0002382      | 0.00030592     |
| k_Bacteria;p__Proteobacteria;c__Gammaproteobacteria;o__Alteromonadales;f__Alteromonadaceae;g__HTCC2207                | 0.00022303                      | 0.00042728             | 0.00860716             | 0.021061       | 0.00884744     | 0.00816494     | 0.0031816      |
| k_Bacteria;p__Proteobacteria;c__Gammaproteobacteria;o__Alteromonadales;f__Alteromonadaceae;g__Marinobacter            | 0.00365218                      | 0.00843161             | 0                      | 0              | 0              | 1.32E-05       | 3.06E-05       |
| k_Bacteria;p__Proteobacteria;c__Gammaproteobacteria;o__Alteromonadales;f__Alteromonadaceae;g__Porticoccus             |                                 | 0                      | 0                      | 0              | 8.97E-05       | 1.32E-05       | 0              |
| k_Bacteria;p__Proteobacteria;c__Gammaproteobacteria;o__Alteromonadales;f__Alteromonadaceae;g__Spongiibacter           |                                 | 0                      | 0                      | 1.47E-05       | 0              | 0              | 0              |
| k_Bacteria;p__Proteobacteria;c__Gammaproteobacteria;o__Alteromonadales;f__Alteromonadaceae;g__ZD0117                  | 0.00057152                      | 0.00243548             | 0.000609               | 0.00011782     | 8.97E-05       | 0.0002382      | 0.00100954     |
| k_Bacteria;p__Proteobacteria;c__Gammaproteobacteria;o__Alteromonadales;f__Alteromonadaceae;g__nsmPV118                |                                 | 0                      | 0                      | 0              | 0              | 0              | 0              |
| k_Bacteria;p__Proteobacteria;c__Gammaproteobacteria;o__Alteromonadales;f__Colwelliaceae;g__                           | 0.01763361                      | 0.03251581             | 0.00086613             | 0.0002651      | 8.97E-05       | 0.0002382      | 6.12E-05       |
| k_Bacteria;p__Proteobacteria;c__Gammaproteobacteria;o__Alteromonadales;f__Colwelliaceae;g__Colwellia                  |                                 | 2.79E-05               | 1.42E-05               | 2.71E-05       | 1.47E-05       | 0              | 1.32E-05       |
| k_Bacteria;p__Proteobacteria;c__Gammaproteobacteria;o__Alteromonadales;f__Colwelliaceae;g__Thalassomonas              |                                 | 1.39E-05               | 0                      | 1.35E-05       | 0              | 2.65E-05       | 6.12E-05       |
| k_Bacteria;p__Proteobacteria;c__Gammaproteobacteria;o__Alteromonadales;f__HTCC2188;g__                                |                                 | 0                      | 1.42E-05               | 0              | 0.00053021     | 0.00295911     | 0.00250109     |

Taxon

| Taxon                                                                                                                 | 2028                            |                        | 2029                   |                | 1184           |                | 1196           |                | 1245           |                | 1246           |                | 2019           |                |
|-----------------------------------------------------------------------------------------------------------------------|---------------------------------|------------------------|------------------------|----------------|----------------|----------------|----------------|----------------|----------------|----------------|----------------|----------------|----------------|----------------|
|                                                                                                                       | Copepod genus<br>Type of sample | Centropages<br>Starved | Centropages<br>Starved | Water<br>Water | Water<br>Water | Water<br>Water | Water<br>Water | Water<br>Water | Water<br>Water | Water<br>Water | Water<br>Water | Water<br>Water | Water<br>Water | Water<br>Water |
| k_Bacteria;p__Proteobacteria;c__Gammaproteobacteria;o__Alteromonadales;f__HTCC2188;g__HTCC                            |                                 | 0.00023697             | 0.00047001             | 0.0006902      | 0.00013255     | 0.00035868     | 0.00030437     | 0.00030592     |                |                |                |                |                |                |
| k_Bacteria;p__Proteobacteria;c__Gammaproteobacteria;o__Alteromonadales;f__Idiomarinaeae;g__Idiomarina                 |                                 | 9.76E-05               | 0.00021364             | 0              | 0              | 0              | 0              | 0              |                |                |                |                |                |                |
| k_Bacteria;p__Proteobacteria;c__Gammaproteobacteria;o__Alteromonadales;f__Moritellaceae;g__Moritella                  |                                 | 1.39E-05               | 0                      | 0              | 4.42E-05       | 2.99E-05       | 0              | 0              |                |                |                |                |                |                |
| k_Bacteria;p__Proteobacteria;c__Gammaproteobacteria;o__Alteromonadales;f__OM60;g__                                    |                                 | 0.00034849             | 0.0007691              | 0.00320738     | 0.00726089     | 0.01629005     | 0.01220109     | 0.02123103     |                |                |                |                |                |                |
| k_Bacteria;p__Proteobacteria;c__Gammaproteobacteria;o__Alteromonadales;f__OM60;g__Congregibacter                      |                                 | 0                      | 0                      | 0              | 0              | 5.98E-05       | 0              | 0              |                |                |                |                |                |                |
| k_Bacteria;p__Proteobacteria;c__Gammaproteobacteria;o__Alteromonadales;f__Psychromonadaeae;g__Psychromonas            |                                 | 1.39E-05               | 0                      | 1.35E-05       | 0.00029456     | 0.00020923     | 0.00010587     | 3.06E-05       |                |                |                |                |                |                |
| k_Bacteria;p__Proteobacteria;c__Gammaproteobacteria;o__Alteromonadales;f__Shewanellaceae;g__Shewanella                |                                 | 0.00030667             | 7.12E-05               | 2.71E-05       | 7.36E-05       | 5.98E-05       | 0.00010587     | 0              |                |                |                |                |                |                |
| k_Bacteria;p__Proteobacteria;c__Gammaproteobacteria;o__Alteromonadales;f__[Chromatiaceae];g__                         |                                 | 0                      | 0                      | 0              | 0              | 2.99E-05       | 0              | 0              |                |                |                |                |                |                |
| k_Bacteria;p__Proteobacteria;c__Gammaproteobacteria;o__Alteromonadales;f__[Chromatiaceae];g__Rheinheimera             |                                 | 0                      | 0                      | 0              | 0              | 0              | 0              | 0              |                |                |                |                |                |                |
| k_Bacteria;p__Proteobacteria;c__Gammaproteobacteria;o__Cardiobacteriales;f__Cardiobacteriaceae;g__Cardiobacterium     |                                 | 0                      | 1.42E-05               | 0              | 0              | 0              | 0              | 0              |                |                |                |                |                |                |
| k_Bacteria;p__Proteobacteria;c__Gammaproteobacteria;o__Chromatiales;f__g__                                            |                                 | 0                      | 0                      | 0.00014887     | 5.89E-05       | 0.00014945     | 0.00013233     | 0.00018355     |                |                |                |                |                |                |
| k_Bacteria;p__Proteobacteria;c__Gammaproteobacteria;o__Chromatiales;f__Chromatiaceae;g__                              |                                 | 0                      | 0                      | 0              | 0              | 0.00011956     | 0              | 0              |                |                |                |                |                |                |
| k_Bacteria;p__Proteobacteria;c__Gammaproteobacteria;o__Enterobacteriales;f__Enterobacteriaceae;g__                    |                                 | 0                      | 0                      | 0              | 0              | 5.98E-05       | 6.62E-05       | 0              |                |                |                |                |                |                |
| k_Bacteria;p__Proteobacteria;c__Gammaproteobacteria;o__Enterobacteriales;f__Enterobacteriaceae;g__Enterobacter        |                                 | 0                      | 0                      | 0              | 0              | 0              | 0              | 0              |                |                |                |                |                |                |
| k_Bacteria;p__Proteobacteria;c__Gammaproteobacteria;o__Enterobacteriales;f__Enterobacteriaceae;g__Erwinia             |                                 | 0                      | 0                      | 0              | 0              | 0              | 0              | 0              |                |                |                |                |                |                |
| k_Bacteria;p__Proteobacteria;c__Gammaproteobacteria;o__Enterobacteriales;f__Enterobacteriaceae;g__Escherichia         |                                 | 0                      | 0                      | 0              | 0              | 0              | 0              | 0              |                |                |                |                |                |                |
| k_Bacteria;p__Proteobacteria;c__Gammaproteobacteria;o__Enterobacteriales;f__Enterobacteriaceae;g__Ewingella           |                                 | 0                      | 0                      | 0.00027983     | 5.98E-05       | 3.97E-05       | 3.06E-05       | 0              |                |                |                |                |                |                |
| k_Bacteria;p__Proteobacteria;c__Gammaproteobacteria;o__Enterobacteriales;f__Enterobacteriaceae;g__Gluconacetobacter   |                                 | 0                      | 0                      | 0              | 0              | 0              | 0              | 0              |                |                |                |                |                |                |
| k_Bacteria;p__Proteobacteria;c__Gammaproteobacteria;o__Enterobacteriales;f__Enterobacteriaceae;g__Klebsiella          |                                 | 0                      | 0                      | 0              | 0              | 0              | 0              | 0              |                |                |                |                |                |                |
| k_Bacteria;p__Proteobacteria;c__Gammaproteobacteria;o__Enterobacteriales;f__Enterobacteriaceae;g__Pantoea             |                                 | 0                      | 1.42E-05               | 0              | 0              | 8.97E-05       | 0              | 0              |                |                |                |                |                |                |
| k_Bacteria;p__Proteobacteria;c__Gammaproteobacteria;o__Enterobacteriales;f__Enterobacteriaceae;g__Salmonella          |                                 | 0                      | 0                      | 0              | 0              | 0              | 0              | 0              |                |                |                |                |                |                |
| k_Bacteria;p__Proteobacteria;c__Gammaproteobacteria;o__Enterobacteriales;f__Enterobacteriaceae;g__Serratia            |                                 | 0                      | 0                      | 0              | 0              | 0              | 1.32E-05       | 0              |                |                |                |                |                |                |
| k_Bacteria;p__Proteobacteria;c__Gammaproteobacteria;o__HTCC2188;f__HTCC2089;g__                                       |                                 | 0.00027879             | 0.00018515             | 0.00063606     | 0.00094259     | 0.0017934      | 0.00247463     | 0.00137665     |                |                |                |                |                |                |
| k_Bacteria;p__Proteobacteria;c__Gammaproteobacteria;o__HTCC2188;f__HTCC2089;g__Acinetobacter                          |                                 | 0                      | 2.85E-05               | 0              | 0              | 0              | 0              | 0              |                |                |                |                |                |                |
| k_Bacteria;p__Proteobacteria;c__Gammaproteobacteria;o__Legionellales;f__g__                                           |                                 | 0                      | 0                      | 0              | 0              | 0              | 2.65E-05       | 0              |                |                |                |                |                |                |
| k_Bacteria;p__Proteobacteria;c__Gammaproteobacteria;o__Legionellales;f__Coxiellaceae;g__                              |                                 | 0                      | 0                      | 1.35E-05       | 0              | 0              | 0              | 0              |                |                |                |                |                |                |
| k_Bacteria;p__Proteobacteria;c__Gammaproteobacteria;o__Legionellales;f__Francisellaceae;g__                           |                                 | 0                      | 5.70E-05               | 0              | 1.47E-05       | 0              | 1.32E-05       | 6.12E-05       |                |                |                |                |                |                |
| k_Bacteria;p__Proteobacteria;c__Gammaproteobacteria;o__Legionellales;f__Legionellaceae;g__                            |                                 | 1.39E-05               | 1.42E-05               | 0              | 0              | 2.99E-05       | 0              | 0              |                |                |                |                |                |                |
| k_Bacteria;p__Proteobacteria;c__Gammaproteobacteria;o__Legionellales;f__Legionellaceae;g__Legionella                  |                                 | 0                      | 0                      | 0              | 0              | 0              | 1.32E-05       | 0              |                |                |                |                |                |                |
| k_Bacteria;p__Proteobacteria;c__Gammaproteobacteria;o__Methylococcales;f__g__                                         |                                 | 0                      | 0                      | 0              | 0              | 0              | 0              | 0              |                |                |                |                |                |                |
| k_Bacteria;p__Proteobacteria;c__Gammaproteobacteria;o__Oceanospirillales;f__g__                                       |                                 | 8.36E-05               | 0.00015667             | 0.00801169     | 0.00201773     | 0.0008967      | 0.00133656     | 0.00061185     |                |                |                |                |                |                |
| k_Bacteria;p__Proteobacteria;c__Gammaproteobacteria;o__Oceanospirillales;f__Alcanivoracaceae;g__Alcanivorax           |                                 | 8.36E-05               | 0.00018515             | 0              | 0              | 0              | 0              | 3.06E-05       |                |                |                |                |                |                |
| k_Bacteria;p__Proteobacteria;c__Gammaproteobacteria;o__Oceanospirillales;f__Endozoicimonaceae;g__Endozoicimonas       |                                 | 0                      | 0                      | 0              | 0              | 5.98E-05       | 0              | 0              |                |                |                |                |                |                |
| k_Bacteria;p__Proteobacteria;c__Gammaproteobacteria;o__Oceanospirillales;f__Halomonadaceae;g__                        |                                 | 0.011542               | 0.02069447             | 0              | 0              | 5.98E-05       | 0              | 0              |                |                |                |                |                |                |
| k_Bacteria;p__Proteobacteria;c__Gammaproteobacteria;o__Oceanospirillales;f__Halomonadaceae;g__Candidatus Portiera     |                                 | 0.00260671             | 0.00665553             | 0.09615385     | 0.05978085     | 0.03293879     | 0.04234653     | 0.02581987     |                |                |                |                |                |                |
| k_Bacteria;p__Proteobacteria;c__Gammaproteobacteria;o__Oceanospirillales;f__Halomonadaceae;g__Cobetia                 |                                 | 0                      | 0                      | 0              | 0              | 0              | 0              | 0              |                |                |                |                |                |                |
| k_Bacteria;p__Proteobacteria;c__Gammaproteobacteria;o__Oceanospirillales;f__Halomonadaceae;g__Haererehalobacter       |                                 | 0                      | 0                      | 0              | 0              | 0              | 0              | 0              |                |                |                |                |                |                |
| k_Bacteria;p__Proteobacteria;c__Gammaproteobacteria;o__Oceanospirillales;f__Halomonadaceae;g__Halomonas               |                                 | 0.00206306             | 0.00246397             | 0              | 0              | 0.00053802     | 0.00026467     | 3.06E-05       |                |                |                |                |                |                |
| k_Bacteria;p__Proteobacteria;c__Gammaproteobacteria;o__Oceanospirillales;f__Oceanospirillaceae;g__                    |                                 | 0.00011152             | 0.00024212             | 0.00454718     | 0.00191464     | 0.00092659     | 0.0013498      | 0.00107073     |                |                |                |                |                |                |
| k_Bacteria;p__Proteobacteria;c__Gammaproteobacteria;o__Oceanospirillales;f__Oceanospirillaceae;g__Amphritea           |                                 | 0                      | 0                      | 0              | 0              | 0              | 1.32E-05       | 0              |                |                |                |                |                |                |
| k_Bacteria;p__Proteobacteria;c__Gammaproteobacteria;o__Oceanospirillales;f__Oceanospirillaceae;g__Marinobacterium     |                                 | 0                      | 0                      | 0              | 0              | 5.98E-05       | 0              | 0              |                |                |                |                |                |                |
| k_Bacteria;p__Proteobacteria;c__Gammaproteobacteria;o__Oceanospirillales;f__Oceanospirillaceae;g__Marinomonas         |                                 | 0.03218657             | 0.00830342             | 0              | 8.84E-05       | 0              | 9.26E-05       | 6.12E-05       |                |                |                |                |                |                |
| k_Bacteria;p__Proteobacteria;c__Gammaproteobacteria;o__Oceanospirillales;f__Oceanospirillaceae;g__Neptunomonas        |                                 | 0                      | 0                      | 0              | 2.95E-05       | 5.98E-05       | 1.32E-05       | 0              |                |                |                |                |                |                |
| k_Bacteria;p__Proteobacteria;c__Gammaproteobacteria;o__Oceanospirillales;f__Oceanospirillaceae;g__Oceaniserpentilla   |                                 | 0                      | 0                      | 0              | 0              | 0              | 0              | 0.00027533     |                |                |                |                |                |                |
| k_Bacteria;p__Proteobacteria;c__Gammaproteobacteria;o__Oceanospirillales;f__Oceanospirillaceae;g__Oleibacter          |                                 | 0.00129638             | 0.00139577             | 0              | 0              | 0              | 0              | 0.00045888     |                |                |                |                |                |                |
| k_Bacteria;p__Proteobacteria;c__Gammaproteobacteria;o__Oceanospirillales;f__Oceanospirillaceae;g__Oleispira           |                                 | 5.58E-05               | 0.00012818             | 0.00041953     | 0              | 2.99E-05       | 2.65E-05       | 0.0007954      |                |                |                |                |                |                |
| k_Bacteria;p__Proteobacteria;c__Gammaproteobacteria;o__Oceanospirillales;f__Oceanospirillaceae;g__Spongilspira        |                                 | 0                      | 0                      | 0              | 0              | 0              | 0              | 3.06E-05       |                |                |                |                |                |                |
| k_Bacteria;p__Proteobacteria;c__Gammaproteobacteria;o__Oceanospirillales;f__Oleiphilaceae;g__                         |                                 | 2.79E-05               | 1.42E-05               | 0              | 0              | 0              | 0              | 0              |                |                |                |                |                |                |
| k_Bacteria;p__Proteobacteria;c__Gammaproteobacteria;o__Oceanospirillales;f__SUP05;g__                                 |                                 | 5.58E-05               | 0                      | 0.01847291     | 0.00428584     | 0.00047824     | 0.00074106     | 0.00027533     |                |                |                |                |                |                |
| k_Bacteria;p__Proteobacteria;c__Gammaproteobacteria;o__Oceanospirillales;f__Saccharospirillaceae;g__Reinekea          |                                 | 0                      | 0                      | 0              | 0              | 0              | 2.65E-05       | 0              |                |                |                |                |                |                |
| k_Bacteria;p__Proteobacteria;c__Gammaproteobacteria;o__Oceanospirillales;f__Saccharospirillaceae;g__Saccharospirillum |                                 | 0                      | 1.42E-05               | 0              | 0              | 0              | 0              | 0              |                |                |                |                |                |                |
| k_Bacteria;p__Proteobacteria;c__Gammaproteobacteria;o__Pasteurellales;f__Pasteurellaceae;g__Actinobacillus            |                                 | 0                      | 0                      | 0              | 0              | 0              | 0              | 0              |                |                |                |                |                |                |
| k_Bacteria;p__Proteobacteria;c__Gammaproteobacteria;o__Pasteurellales;f__Pasteurellaceae;g__Aggregatibacter           |                                 | 0                      | 0                      | 0              | 0              | 0              | 0              | 0              |                |                |                |                |                |                |
| k_Bacteria;p__Proteobacteria;c__Gammaproteobacteria;o__Pasteurellales;f__Pasteurellaceae;g__Haemophilus               |                                 | 0                      | 1.42E-05               | 0              | 0              | 0              | 0              | 0              |                |                |                |                |                |                |
| k_Bacteria;p__Proteobacteria;c__Gammaproteobacteria;o__Pseudomonadales;f__Moraxellaceae;g__                           |                                 | 0.03091806             | 0.02607816             | 0.00033833     | 2.95E-05       | 2.99E-05       | 7.94E-05       | 9.18E-05       |                |                |                |                |                |                |
| k_Bacteria;p__Proteobacteria;c__Gammaproteobacteria;o__Pseudomonadales;f__Moraxellaceae;g__Alkaninobacter             |                                 | 0                      | 0                      | 0              | 0              | 0.00014945     | 3.97E-05       | 3.06E-05       |                |                |                |                |                |                |
| k_Bacteria;p__Proteobacteria;c__Gammaproteobacteria;o__Pseudomonadales;f__Moraxellaceae;g__Alkanindiges               |                                 | 0                      | 0                      | 0              | 0              | 0              | 5.29E-05       | 0              |                |                |                |                |                |                |
| k_Bacteria;p__Proteobacteria;c__Gammaproteobacteria;o__Pseudomonadales;f__Moraxellaceae;g__Enhydrobacter              |                                 | 0                      | 0                      | 0              | 0              | 0              | 0              | 0              |                |                |                |                |                |                |
| k_Bacteria;p__Proteobacteria;c__Gammaproteobacteria;o__Pseudomonadales;f__Moraxellaceae;g__Perlucciobaca              |                                 | 0                      | 0                      | 0              | 0              | 0              | 0              | 0              |                |                |                |                |                |                |
| k_Bacteria;p__Proteobacteria;c__Gammaproteobacteria;o__Pseudomonadales;f__Moraxellaceae;g__Psychrobacter              |                                 | 0.00844741             | 0.00840312             | 6.77E-05       | 0              | 5.98E-05       | 1.32E-05       | 0              |                |                |                |                |                |                |
| k_Bacteria;p__Proteobacteria;c__Gammaproteobacteria;o__Pseudomonadales;f__Pseudomonadaceae;g__                        |                                 | 0                      | 0                      | 0              | 0              | 0              | 0              | 0              |                |                |                |                |                |                |
| k_Bacteria;p__Proteobacteria;c__Gammaproteobacteria;o__Pseudomonadales;f__Pseudomonadaceae;g__Pseudomonas             |                                 | 0.00114305             | 0.00021364             | 0              | 0              | 0              | 1.32E-05       | 0              |                |                |                |                |                |                |
| k_Bacteria;p__Proteobacteria;c__Gammaproteobacteria;o__Salinisphaerales;f__Salinisphaeraeae;g__Salinisphaera          |                                 | 1.39E-05               | 0                      | 0              | 0              | 0              | 0              | 0              |                |                |                |                |                |                |
| k_Bacteria;p__Proteobacteria;c__Gammaproteobacteria;o__Thiohalorhabdadales;f__g__                                     |                                 | 0                      | 0                      | 5.41E-05       | 0.0001031      | 0.0002989      | 0.0002382      | 0.00015296     |                |                |                |                |                |                |
| k_Bacteria;p__Proteobacteria;c__Gammaproteobacteria;o__Thiohalorhabdadales;f__Thiohalorhabdadaeae;g__                 |                                 | 0                      | 0                      | 0              | 2.95E-05       | 0              | 0              | 0              |                |                |                |                |                |                |
| k_Bacteria;p__Proteobacteria;c__Gammaproteobacteria;o__Thiotrichales;f__Piscirickettsiaceae;g__                       |                                 | 5.58E-05               | 0.00015667             | 0.00295025     | 0.00167899     | 0.00068747     | 0.0007146      | 0.00330396     |                |                |                |                |                |                |
| k_Bacteria;p__Proteobacteria;c__Gammaproteobacteria;o__Thiotrichales;f__Piscirickettsiaceae;g__Methylophaga           |                                 | 0                      | 0.00024212             | 0              | 1.47E-05       | 0              | 0              | 0              |                |                |                |                |                |                |
| k_Bacteria;p__Proteobacteria;c__Gammaproteobacteria;o__Thiotrichales;f__Thiotrichaceae;g__                            |                                 | 0                      | 0                      | 0              | 0              | 0              | 3.97E-05       | 0              |                |                |                |                |                |                |
| k_Bacteria;p__Proteobacteria;c__Gammaproteobacteria;o__Thiotrichales;f__Thiotrichaceae;g__Cocleimonas                 |                                 | 0                      | 0                      | 0              | 0              | 5.98E-05       | 2.65E-05       | 0              |                |                |                |                |                |                |
| k_Bacteria;p__Proteobacteria;c__Gammaproteobacteria;o__Thiotrichales;f__Thiotrichaceae;g__E8                          |                                 | 0                      | 0                      | 0              | 0              | 0              | 0              | 0              |                |                |                |                |                |                |
| k_Bacteria;p__Proteobacteria;c__Gammaproteobacteria;o__Thiotrichales;f__Thiotrichaceae;g__Leucothrix                  |                                 | 0                      | 0                      | 0              | 0.00054494     | 0.00020923     | 0.00010587     | 0              |                |                |                |                |                |                |
| k_Bacteria;p__Proteobacteria;c__Gammaproteobacteria;o__Thiotrichales;f__Thiotrichaceae;g__Thiothrix                   |                                 | 0                      | 0                      | 0              | 0.00025038     | 2.99E-05       | 2.65E-05       | 0              |                |                |                |                |                |                |
| k_Bacteria;p__Proteobacteria;c__Gammaproteobacteria;o__Vibrionales;f__Pseudoalteromonadaceae;g__                      |                                 | 0.00255095             | 0.00378853             | 0.00033833     | 0.00039766     | 5.98E-05       | 9.26E-05       | 0.0023862      |                |                |                |                |                |                |
| k_Bacteria;p__Proteobacteria;c__Gammaproteobacteria;o__Vibrionales;f__Pseudoalteromonadaceae;g__Pseudoalteromonas     |                                 | 0.58893473             | 0.36355609             | 0.00776809     | 0.00053021     | 0.00352702     | 0.00207763     | 0.02306657     |                |                |                |                |                |                |
